# Supplementary material for: Structural basis of phosphatidylcholine recognition by the C2–domain of cytosolic phospholipase A2α
Source: eLife journal article supplement (doi:10.7554/elife.44760), 2019-05-03
Supplement: fig4-data1 [file elife-44760-fig4-data1-v3.pdf]

### Figure 4 -source data 1

cPLA2 $\alpha$  C2-domain binding affinity for phosphoglyceride and sphingomyelin (SM) vesicles

#### Figure 4B

| Phosphoglyceride | Relative Response (R.U.) | SD   |
|------------------|--------------------------|------|
| PC               | 68.78                    | 7.14 |
| PS/PE            | 11.6                     | 2.18 |
| PS               | 4.74                     | 1.89 |
| PA               | 7.05                     | 2.18 |
| PG               | 9.77                     | 2.24 |
| PI               | 8.99                     | 2.07 |
| PC/PS            | 61.54                    | 5.54 |
| PC/PE            | 63.48                    | 4.37 |

#### Figure 4C

| C2 domain conc. ( $\mu$ M) | POPC Relative Response (R.U.) | 18:1 SM Relative Response (R.U.) |
|----------------------------|-------------------------------|----------------------------------|
| 0                          | 0                             | 0                                |
| 0.1                        | 10.72                         | 1.5                              |
| 0.2                        | 26.35                         | 3.61                             |
| 0.4                        | 44.29                         | 7.85                             |
| 0.6                        | 59.12                         | 12.42                            |
| 1                          | 69.78                         | 19.01                            |
| 2                          | 79.89                         | 42.34                            |
| 4                          | 82.69                         | 64.95                            |

#### Figure 4D

| C2 domain | 18:1 SM Relative Response (R.U.) | SD   |
|-----------|----------------------------------|------|
| WT        | 23.92                            | 5.38 |
| Y96F      | 16.04                            | 3.72 |
| Y96A      | 7.64                             | 1.95 |
| N65D      | 9.41                             | 2.54 |
