# Supplementary material for: Structural basis of phosphatidylcholine recognition by the C2–domain of cytosolic phospholipase A2α
Source: eLife journal article supplement (doi:10.7554/elife.44760), 2019-05-03
Supplement: supp [file 2018-02-23_kinetics KsA wt and mut 19_2 3mm Tx PAPC.xlsx]

## Sheet: Raw Data
	Sample Name		AA	AA d8
1	1		47500	29100
2	2		138000	33300
3	3		180000	35300
4	4		207000	36900
5	5		224000	40300
6	6		255000	43900
7	7		80100	32600
8	8		399000	38600
9	9		520000	39700
10	10		548000	42000
11	11		602000	45200
12	12		644000	49600
13	13		118000	33100
14	14		756000	45200
15	15		895000	44400
16	16		966000	45300
17	17		1050000	48900
18	18		1130000	54200
19	19		174000	36000
20	20		1090000	51400
21	21		1270000	47900
22	22		1370000	49600
23	23		1470000	50400
24	24		1590000	59300
25	25		22200	30300
26	26		23700	29100
27	27		35400	32600
28	28		37400	32100
29	29		72600	34100
30	30		81200	35000
31	31		108000	37200
32	32		132000	38700
33	33		153000	39400
34	34		172000	40400
35	35		189000	45300
36	36		206000	44800
37	37		31800	30300
38	38		34400	28800
39	39		89700	34800
40	40		98300	34500
41	41		203000	37700
42	42		229000	37700
43	43		307000	41200
44	44		338000	42300
45	45		400000	43500
46	46		447000	44600
47	47		436000	47600
48	48		506000	49500
49	49		40100	29600
50	50		44800	30600
51	51		194000	39200
52	52		213000	39800
53	53		398000	39200
54	54		438000	38800
55	55		556000	45600
56	56		633000	45400
57	57		709000	46000
58	58		787000	46700
59	59		777000	54200
60	60		872000	54300
61	61		51500	30900
62	62		54200	30600
63	63		380000	44800
64	64		419000	44800
65	65		685000	43000
66	66		730000	42900
67	67		918000	49600
68	68		1030000	50200
69	69		1070000	48000
70	70		1130000	49800
71	71		1190000	58100
72	72		1310000	60300

## Sheet: AA
	Sample Name	AA	AA d8		ng AA				gram of AA	mol AA	nmol AA	nmol AA/min	nmol AA/min/mg cpla2					19	N65D
1	100	47500	29100		65.2921				6.52921e-08	2.14447e-10	0.214447	0.00357412	14.2965					20	A94Y
2	300	138000	33300		165.766				1.65766e-07	5.44446e-10	0.544446	0.0090741	36.2964					21	A94F
3	500	180000	35300		203.966				2.03966e-07	6.69912e-10	0.669912	0.0111652	44.6608					22	Y96A
4	800	207000	36900		224.39				2.2439e-07	7.36994e-10	0.736994	0.0122832	49.1329
5	1200	224000	40300		222.333				2.22333e-07	7.30235e-10	0.730235	0.0121706	48.6824
6	1600	255000	43900		232.346				2.32346e-07	7.63125e-10	0.763125	0.0127187	50.875
7	100	80100	32600		98.2822				9.82822e-08	3.22801e-10	0.322801	0.00538002	21.5201
8	300	399000	38600		413.472				4.13472e-07	1.35802e-09	1.35802	0.0226336	90.5345
9	500	520000	39700		523.929				5.23929e-07	1.72081e-09	1.72081	0.0286802	114.721
10	800	548000	42000		521.905				5.21905e-07	1.71416e-09	1.71416	0.0285693	114.277
11	1200	602000	45200		532.743				5.32743e-07	1.74976e-09	1.74976	0.0291626	116.651
12	1600	644000	49600		519.355				5.19355e-07	1.70578e-09	1.70578	0.0284297	113.719
13	100	118000	33100		142.598				1.42598e-07	4.68354e-10	0.468354	0.00780589	31.2236
14	300	756000	45200		669.027				6.69027e-07	2.19737e-09	2.19737	0.0366228	146.491
15	500	895000	44400		806.306				8.06306e-07	2.64826e-09	2.64826	0.0441376	176.55
16	800	966000	45300		852.98				8.5298e-07	2.80155e-09	2.80155	0.0466925	186.77
17	1200	1050000	48900		858.896				8.58896e-07	2.82098e-09	2.82098	0.0470164	188.065
18	1600	1130000	54200		833.948				8.33948e-07	2.73904e-09	2.73904	0.0456507	182.603
19	100	174000	36000		193.333				1.93333e-07	6.3499e-10	0.63499	0.0105832	42.3326
20	300	1090000	51400		848.249				8.48249e-07	2.78601e-09	2.78601	0.0464336	185.734
21	500	1270000	47900		1060.54				1.06054e-06	3.48328e-09	3.48328	0.0580546	232.219
22	800	1370000	49600		1104.84				1.10484e-06	3.62876e-09	3.62876	0.0604794	241.918
23	1200	1470000	50400		1166.67				1.16667e-06	3.83183e-09	3.83183	0.0638639	255.456
24	1600	1590000	59300		1072.51				1.07251e-06	3.52259e-09	3.52259	0.0587099	234.839
25	100	22200	30300		29.3069				2.93069e-08	9.62565e-11	0.0962565	0.00160428	6.4171
26	100	23700	29100		32.5773				3.25773e-08	1.06998e-10	0.106998	0.0017833	7.13319
27	300	35400	32600		43.4356				4.34356e-08	1.42661e-10	0.142661	0.00237768	9.51074
28	300	37400	32100		46.6044				4.66044e-08	1.53069e-10	0.153069	0.00255115	10.2046
29	500	72600	34100		85.1613				8.51613e-08	2.79706e-10	0.279706	0.00466177	18.6471
30	500	81200	35000		92.8				9.28e-08	3.04795e-10	0.304795	0.00507992	20.3197
31	800	108000	37200		116.129				1.16129e-07	3.81418e-10	0.381418	0.00635696	25.4278
32	800	132000	38700		136.434				1.36434e-07	4.48108e-10	0.448108	0.00746847	29.8739
33	1200	153000	39400		155.33				1.5533e-07	5.1017e-10	0.51017	0.00850284	34.0113
34	1200	172000	40400		170.297				1.70297e-07	5.59329e-10	0.559329	0.00932214	37.2886
35	1600	189000	45300		166.887				1.66887e-07	5.4813e-10	0.54813	0.0091355	36.542
36	1600	206000	44800		183.929				1.83929e-07	6.041e-10	0.6041	0.0100683	40.2734
37	100	31800	30300		41.9802				4.19802e-08	1.37881e-10	0.137881	0.00229802	9.19207
38	100	34400	28800		47.7778				4.77778e-08	1.56923e-10	0.156923	0.00261538	10.4615
39	300	89700	34800		103.103				1.03103e-07	3.38636e-10	0.338636	0.00564393	22.5757
40	300	98300	34500		113.971				1.13971e-07	3.7433e-10	0.37433	0.00623883	24.9553
41	500	203000	37700		215.385				2.15385e-07	7.07416e-10	0.707416	0.0117903	47.161
42	500	229000	37700		242.971				2.42971e-07	7.9802e-10	0.79802	0.0133003	53.2014
43	800	307000	41200		298.058				2.98058e-07	9.78951e-10	0.978951	0.0163159	65.2634
44	800	338000	42300		319.622				3.19622e-07	1.04978e-09	1.04978	0.0174963	69.985
45	1200	400000	43500		367.816				3.67816e-07	1.20807e-09	1.20807	0.0201344	80.5377
46	1200	447000	44600		400.897				4.00897e-07	1.31672e-09	1.31672	0.0219453	87.7812
47	1600	436000	47600		366.387				3.66387e-07	1.20337e-09	1.20337	0.0200562	80.2247
48	1600	506000	49500		408.889				4.08889e-07	1.34297e-09	1.34297	0.0223828	89.5311
49	100	40100	29600		54.1892				5.41892e-08	1.77981e-10	0.177981	0.00296634	11.8654
50	100	44800	30600		58.5621				5.85621e-08	1.92343e-10	0.192343	0.00320572	12.8229
51	300	194000	39200		197.959				1.97959e-07	6.50183e-10	0.650183	0.0108364	43.3455
52	300	213000	39800		214.07				2.1407e-07	7.03099e-10	0.703099	0.0117183	46.8733
53	500	398000	39200		406.122				4.06122e-07	1.33388e-09	1.33388	0.0222313	88.9254
54	500	438000	38800		451.546				4.51546e-07	1.48307e-09	1.48307	0.0247179	98.8715
55	800	556000	45600		487.719				4.87719e-07	1.60188e-09	1.60188	0.026698	106.792
56	800	633000	45400		557.709				5.57709e-07	1.83176e-09	1.83176	0.0305293	122.117
57	1200	709000	46000		616.522				6.16522e-07	2.02492e-09	2.02492	0.0337487	134.995
58	1200	787000	46700		674.09				6.7409e-07	2.214e-09	2.214	0.0369	147.6
59	1600	777000	54200		573.432				5.73432e-07	1.8834e-09	1.8834	0.0313899	125.56
60	1600	872000	54300		642.357				6.42357e-07	2.10978e-09	2.10978	0.035163	140.652
61	100	51500	30900		66.6667				6.66667e-08	2.18962e-10	0.218962	0.00364937	14.5975
62	100	54200	30600		70.8497				7.08497e-08	2.32701e-10	0.232701	0.00387835	15.5134
63	300	380000	44800		339.286				3.39286e-07	1.11436e-09	1.11436	0.0185727	74.2907
64	300	419000	44800		374.107				3.74107e-07	1.22873e-09	1.22873	0.0204788	81.9152
65	500	685000	43000		637.209				6.37209e-07	2.09287e-09	2.09287	0.0348811	139.525
66	500	730000	42900		680.653				6.80653e-07	2.23556e-09	2.23556	0.0372593	149.037
67	800	918000	49600		740.323				7.40323e-07	2.43154e-09	2.43154	0.0405256	162.102
68	800	1030000	50200		820.717				8.20717e-07	2.69559e-09	2.69559	0.0449265	179.706
69	1200	1070000	48000		891.667				8.91667e-07	2.92862e-09	2.92862	0.0488103	195.241
70	1200	1130000	49800		907.631				9.07631e-07	2.98105e-09	2.98105	0.0496841	198.737
71	1600	1190000	58100		819.277				8.19277e-07	2.69086e-09	2.69086	0.0448476	179.391
72	1600	1310000	60300		868.988				8.68988e-07	2.85413e-09	2.85413	0.0475688	190.275

## Sheet: conversion before graphs
				wt	100	300	500	800	1200	1600
100	14.2965			15	14.2965	36.2964	44.6608	49.1329	48.6824	50.875
300	36.2964			30	21.5201	90.5345	114.721	114.277	116.651	113.719
500	44.6608			45	31.2236	146.491	176.55	186.77	188.065	182.603
800	49.1329			60	42.3326	185.734	232.219	241.918	255.456	234.839
1200	48.6824			mut19	100	300	500	800	1200	1600
1600	50.875			0	0	0	0	0	0	0
100	21.5201			15	6.4171	9.51074	18.6471	25.4278	34.0113	36.542
300	90.5345			30	9.19207	22.5757	47.161	65.2634	80.5377	80.2247
500	114.721			45	11.8654	43.3455	88.9254	106.792	134.995	125.56
800	114.277			60	14.5975	74.2907	139.525	162.102	195.241	179.391
1200	116.651			mut19	100	300	500	800	1200	1600
1600	113.719			0	0	0	0	0	0	0
100	31.2236			15	7.13319	10.2046	20.3197	29.8739	37.2886	40.2734
300	146.491			30	10.4615	24.9553	53.2014	69.985	87.7812	89.5311
500	176.55			45	12.8229	46.8733	98.8715	122.117	147.6	140.652
800	186.77			60	15.5134	81.9152	149.037	179.706	198.737	190.275
1200	188.065
1600	182.603
100	42.3326
300	185.734
500	232.219
800	241.918
1200	255.456
1600	234.839
100	6.4171
100	7.13319
300	9.51074
300	10.2046
500	18.6471
500	20.3197
800	25.4278
800	29.8739
1200	34.0113
1200	37.2886
1600	36.542
1600	40.2734
100	9.19207
100	10.4615
300	22.5757
300	24.9553
500	47.161
500	53.2014
800	65.2634
800	69.985
1200	80.5377
1200	87.7812
1600	80.2247
1600	89.5311
100	11.8654
100	12.8229
300	43.3455
300	46.8733
500	88.9254
500	98.8715
800	106.792
800	122.117
1200	134.995
1200	147.6
1600	125.56
1600	140.652
100	14.5975
100	15.5134
300	74.2907
300	81.9152
500	139.525
500	149.037
800	162.102
800	179.706
1200	195.241
1200	198.737
1600	179.391
1600	190.275

## Sheet: WT
wt	100	300	500	800	1200	1600
0	0	0	0	0	0	0
15	14.2965	36.2964	44.6608	49.1329	48.6824	50.875
30	21.5201	90.5345	114.721	114.277	116.651	113.719
45	31.2236	146.491	176.55	186.77	188.065	182.603
60	42.3326	185.734	232.219	241.918	255.456	234.839
concentration	slope
0	0
100	0.6773
300	3.2111
500	3.9755
800	4.1432
1200	4.3353
1600	4.0094

## Sheet: Mut19N65D_1
mut19	100	300	500	800	1200	1600
0	0	0	0	0	0	0
15	6.4171	9.51074	18.6471	25.4278	34.0113	36.542
30	9.19207	22.5757	47.161	65.2634	80.5377	80.2247
45	11.8654	43.3455	88.9254	106.792	134.995	125.56
60	14.5975	74.2907	139.525	162.102	195.241	179.391
concentration	slope
0	0
100	0.231
300	1.2161
500	2.3288
800	2.7038
1200	3.2764
1600	2.9853

## Sheet: Mut19_2
mut19	100	300	500	800	1200	1600
0	0	0	0	0	0	0
15	7.13319	10.2046	20.3197	29.8739	37.2886	40.2734
30	10.4615	24.9553	53.2014	69.985	87.7812	89.5311
45	12.8229	46.8733	98.8715	122.117	147.6	140.652
60	15.5134	81.9152	149.037	179.706	198.737	190.275
concentration	slope
0	0
100	0.2448
300	1.3367
500	2.5108
800	3.011
1200	3.3852
1600	3.2062
