# Supplementary material for: Structural basis of phosphatidylcholine recognition by the C2–domain of cytosolic phospholipase A2α
Source: eLife journal article supplement (doi:10.7554/elife.44760), 2019-05-03
Supplement: supp [file 2018-02-23_kinetics KsA wt and mut 19_2 3mm Tx PAPC_02.xlsx]

## Sheet: Raw Data
	Sample Name		AA	AA d8
1	1		50200	31900
2	2		159000	36300
3	3		197000	37600
4	4		214000	39200
5	5		225000	40700
6	6		263000	45000
7	7		76100	33300
8	8		449000	41500
9	9		528000	42900
10	10		576000	43600
11	11		599000	47400
12	12		648000	49400
13	13		123000	34500
14	14		840000	47900
15	15		979000	46500
16	16		1000000	48300
17	17		1050000	48800
18	18		1110000	50900
19	19		168000	35600
20	20		1170000	56600
21	21		1460000	50800
22	22		1490000	50200
23	23		1510000	51000
24	24		1570000	53100
25	25		10300	32800
26	26		21300	32800
27	27		26500	33300
28	28		29500	35700
29	29		60800	35500
30	30		66500	36500
31	31		96000	38200
32	32		104000	38100
33	33		129000	40700
34	34		147000	41400
35	35		161000	43400
36	36		183000	44100
37	37		25600	31300
38	38		27000	32000
39	39		60900	34100
40	40		65700	32700
41	41		150000	38200
42	42		106000	36800
43	43		244000	41900
44	44		280000	39900
45	45		337000	44900
46	46		375000	43000
47	47		393000	48400
48	48		454000	48500
49	49		35000	31700
50	50		35900	31700
51	51		114000	34700
52	52		125000	35700
53	53		292000	37300
54	54		329000	39900
55	55		446000	42400
56	56		505000	43800
57	57		570000	45500
58	58		640000	46300
59	59		685000	50500
60	60		752000	51200
61	61		44100	32000
62	62		44400	32200
63	63		193000	35800
64	64		209000	35500
65	65		470000	40800
66	66		529000	42300
67	67		698000	45800
68	68		785000	44600
69	69		901000	47600
70	70		987000	49200
71	71		1050000	54700
72	72		1140000	54000

## Sheet: AA
	Sample Name	AA	AA d8		ng AA				gram of AA	mol AA	nmol AA	nmol AA/min	nmol AA/min/mg cpla2					19	N65D
1	100	50200	31900		62.9467				6.29467e-08	2.06744e-10	0.206744	0.00344573	13.7829					20	A94Y
2	300	159000	36300		175.207				1.75207e-07	5.75454e-10	0.575454	0.0095909	38.3636					21	A94F
3	500	197000	37600		209.574				2.09574e-07	6.88333e-10	0.688333	0.0114722	45.8888					22	Y96A
4	800	214000	39200		218.367				2.18367e-07	7.17212e-10	0.717212	0.0119535	47.8141
5	1200	225000	40700		221.13				2.2113e-07	7.26287e-10	0.726287	0.0121048	48.4191
6	1600	263000	45000		233.778				2.33778e-07	7.67827e-10	0.767827	0.0127971	51.1884
7	100	76100	33300		91.4114				9.14114e-08	3.00234e-10	0.300234	0.00500391	20.0156
8	300	449000	41500		432.771				4.32771e-07	1.42141e-09	1.42141	0.0236901	94.7604
9	500	528000	42900		492.308				4.92308e-07	1.61695e-09	1.61695	0.0269492	107.797
10	800	576000	43600		528.44				5.2844e-07	1.73563e-09	1.73563	0.0289271	115.708
11	1200	599000	47400		505.485				5.05485e-07	1.66023e-09	1.66023	0.0276705	110.682
12	1600	648000	49400		524.696				5.24696e-07	1.72333e-09	1.72333	0.0287221	114.889
13	100	123000	34500		142.609				1.42609e-07	4.68388e-10	0.468388	0.00780647	31.2259
14	300	840000	47900		701.461				7.01461e-07	2.3039e-09	2.3039	0.0383983	153.593
15	500	979000	46500		842.151				8.42151e-07	2.76598e-09	2.76598	0.0460997	184.399
16	800	1000000	48300		828.157				8.28157e-07	2.72002e-09	2.72002	0.0453337	181.335
17	1200	1050000	48800		860.656				8.60656e-07	2.82676e-09	2.82676	0.0471127	188.451
18	1600	1110000	50900		872.299				8.72299e-07	2.865e-09	2.865	0.0477501	191
19	100	168000	35600		188.764				1.88764e-07	6.19982e-10	0.619982	0.010333	41.3321
20	300	1170000	56600		826.855				8.26855e-07	2.71575e-09	2.71575	0.0452625	181.05
21	500	1460000	50800		1149.61				1.14961e-06	3.7758e-09	3.7758	0.06293	251.72
22	800	1490000	50200		1187.25				1.18725e-06	3.89944e-09	3.89944	0.0649907	259.963
23	1200	1510000	51000		1184.31				1.18431e-06	3.88979e-09	3.88979	0.0648299	259.32
24	1600	1570000	53100		1182.67				1.18267e-06	3.88441e-09	3.88441	0.0647402	258.961
25	100	10300	32800		12.561				1.2561e-08	4.12556e-11	0.0412556	0.000687594	2.75038
26	100	21300	32800		25.9756				2.59756e-08	8.53151e-11	0.0853151	0.00142192	5.68767
27	300	26500	33300		31.8318				3.18318e-08	1.04549e-10	0.104549	0.00174249	6.96996
28	300	29500	35700		33.0532				3.30532e-08	1.08561e-10	0.108561	0.00180935	7.2374
29	500	60800	35500		68.507				6.8507e-08	2.25007e-10	0.225007	0.00375011	15.0004
30	500	66500	36500		72.8767				7.28767e-08	2.39358e-10	0.239358	0.00398931	15.9572
31	800	96000	38200		100.524				1.00524e-07	3.30163e-10	0.330163	0.00550271	22.0108
32	800	104000	38100		109.186				1.09186e-07	3.58615e-10	0.358615	0.00597691	23.9077
33	1200	129000	40700		126.781				1.26781e-07	4.16404e-10	0.416404	0.00694007	27.7603
34	1200	147000	41400		142.029				1.42029e-07	4.66484e-10	0.466484	0.00777474	31.0989
35	1600	161000	43400		148.387				1.48387e-07	4.87367e-10	0.487367	0.00812278	32.4911
36	1600	183000	44100		165.986				1.65986e-07	5.45171e-10	0.545171	0.00908618	36.3447
37	100	25600	31300		32.7157				3.27157e-08	1.07452e-10	0.107452	0.00179087	7.16348
38	100	27000	32000		33.75				3.375e-08	1.10849e-10	0.110849	0.00184749	7.38997
39	300	60900	34100		71.437				7.1437e-08	2.3463e-10	0.23463	0.00391049	15.642
40	300	65700	32700		80.367				8.0367e-08	2.6396e-10	0.26396	0.00439933	17.5973
41	500	150000	38200		157.068				1.57068e-07	5.15879e-10	0.515879	0.00859798	34.3919
42	500	106000	36800		115.217				1.15217e-07	3.78423e-10	0.378423	0.00630706	25.2282
43	800	244000	41900		232.936				2.32936e-07	7.6506e-10	0.76506	0.012751	51.004
44	800	280000	39900		280.702				2.80702e-07	9.21945e-10	0.921945	0.0153658	61.463
45	1200	337000	44900		300.223				3.00223e-07	9.8606e-10	0.98606	0.0164343	65.7374
46	1200	375000	43000		348.837				3.48837e-07	1.14573e-09	1.14573	0.0190955	76.3821
47	1600	393000	48400		324.793				3.24793e-07	1.06676e-09	1.06676	0.0177793	71.1174
48	1600	454000	48500		374.433				3.74433e-07	1.2298e-09	1.2298	0.0204966	81.9866
49	100	35000	31700		44.164				4.4164e-08	1.45054e-10	0.145054	0.00241756	9.67024
50	100	35900	31700		45.2997				4.52997e-08	1.48784e-10	0.148784	0.00247973	9.91891
51	300	114000	34700		131.412				1.31412e-07	4.31614e-10	0.431614	0.00719356	28.7743
52	300	125000	35700		140.056				1.40056e-07	4.60004e-10	0.460004	0.00766674	30.6669
53	500	292000	37300		313.137				3.13137e-07	1.02848e-09	1.02848	0.0171413	68.565
54	500	329000	39900		329.825				3.29825e-07	1.08329e-09	1.08329	0.0180548	72.219
55	800	446000	42400		420.755				4.20755e-07	1.38194e-09	1.38194	0.0230323	92.1293
56	800	505000	43800		461.187				4.61187e-07	1.51474e-09	1.51474	0.0252456	100.982
57	1200	570000	45500		501.099				5.01099e-07	1.64582e-09	1.64582	0.0274304	109.722
58	1200	640000	46300		552.916				5.52916e-07	1.81601e-09	1.81601	0.0302669	121.068
59	1600	685000	50500		542.574				5.42574e-07	1.78205e-09	1.78205	0.0297008	118.803
60	1600	752000	51200		587.5				5.875e-07	1.9296e-09	1.9296	0.03216	128.64
61	100	44100	32000		55.125				5.5125e-08	1.81054e-10	0.181054	0.00301757	12.0703
62	100	44400	32200		55.1553				5.51553e-08	1.81154e-10	0.181154	0.00301923	12.0769
63	300	193000	35800		215.642				2.15642e-07	7.08262e-10	0.708262	0.0118044	47.2175
64	300	209000	35500		235.493				2.35493e-07	7.7346e-10	0.77346	0.012891	51.564
65	500	470000	40800		460.784				4.60784e-07	1.51341e-09	1.51341	0.0252236	100.894
66	500	529000	42300		500.236				5.00236e-07	1.64299e-09	1.64299	0.0273832	109.533
67	800	698000	45800		609.607				6.09607e-07	2.00221e-09	2.00221	0.0333702	133.481
68	800	785000	44600		704.036				7.04036e-07	2.31236e-09	2.31236	0.0385393	154.157
69	1200	901000	47600		757.143				7.57143e-07	2.48678e-09	2.48678	0.0414464	165.785
70	1200	987000	49200		802.439				8.02439e-07	2.63555e-09	2.63555	0.0439259	175.704
71	1600	1050000	54700		767.824				7.67824e-07	2.52187e-09	2.52187	0.0420311	168.124
72	1600	1140000	54000		844.444				8.44444e-07	2.77352e-09	2.77352	0.0462253	184.901

## Sheet: conversion before graphs
				wt	100	300	500	800	1200	1600
100	13.7829			15	13.7829	38.3636	45.8888	47.8141	48.4191	51.1884
300	38.3636			30	20.0156	94.7604	107.797	115.708	110.682	114.889
500	45.8888			45	31.2259	153.593	184.399	181.335	188.451	191
800	47.8141			60	41.3321	181.05	251.72	259.963	259.32	258.961
1200	48.4191			mut19	100	300	500	800	1200	1600
1600	51.1884			0	0	0	0	0	0	0
100	20.0156			15	2.75038	6.96996	15.0004	22.0108	27.7603	32.4911
300	94.7604			30	7.16348	15.642	34.3919	51.004	65.7374	71.1174
500	107.797			45	9.67024	28.7743	68.565	92.1293	109.722	118.803
800	115.708			60	12.0703	47.2175	100.894	133.481	165.785	168.124
1200	110.682			mut19	100	300	500	800	1200	1600
1600	114.889			0	0	0	0	0	0	0
100	31.2259			15	5.68767	7.2374	15.9572	23.9077	31.0989	36.3447
300	153.593			30	7.38997	17.5973	25.2282	61.463	76.3821	81.9866
500	184.399			45	9.91891	30.6669	72.219	100.982	121.068	128.64
800	181.335			60	12.0769	51.564	109.533	154.157	175.704	184.901
1200	188.451
1600	191
100	41.3321
300	181.05
500	251.72
800	259.963
1200	259.32
1600	258.961
100	2.75038
100	5.68767
300	6.96996
300	7.2374
500	15.0004
500	15.9572
800	22.0108
800	23.9077
1200	27.7603
1200	31.0989
1600	32.4911
1600	36.3447
100	7.16348
100	7.38997
300	15.642
300	17.5973
500	34.3919
500	25.2282
800	51.004
800	61.463
1200	65.7374
1200	76.3821
1600	71.1174
1600	81.9866
100	9.67024
100	9.91891
300	28.7743
300	30.6669
500	68.565
500	72.219
800	92.1293
800	100.982
1200	109.722
1200	121.068
1600	118.803
1600	128.64
100	12.0703
100	12.0769
300	47.2175
300	51.564
500	100.894
500	109.533
800	133.481
800	154.157
1200	165.785
1200	175.704
1600	168.124
1600	184.901

## Sheet: WT
wt	100	300	500	800	1200	1600
0	0	0	0	0	0	0
15	13.7829	38.3636	45.8888	47.8141	48.4191	51.1884
30	20.0156	94.7604	107.797	115.708	110.682	114.889
45	31.2259	153.593	184.399	181.335	188.451	191
60	41.3321	181.05	251.72	259.963	259.32	258.961
concentration	slope
0	0
100	0.6674
300	3.1822
500	4.2797
800	4.3563
1200	4.3911
1600	4.3849

## Sheet: Mut19N65D_1
mut19	100	300	500	800	1200	1600
0	0	0	0	0	0	0
15	2.75038	6.96996	15.0004	22.0108	27.7603	32.4911
30	7.16348	15.642	34.3919	51.004	65.7374	71.1174
45	9.67024	28.7743	68.565	92.1293	109.722	118.803
60	12.0703	47.2175	100.894	133.481	165.785	168.124
concentration	slope
0	0
100	0.2071
300	0.7749
500	1.7024
800	2.2472
1200	2.7569
1600	2.8171

## Sheet: Mut19_2
mut19	100	300	500	800	1200	1600
0	0	0	0	0	0	0
15	5.68767	7.2374	15.9572	23.9077	31.0989	36.3447
30	7.38997	17.5973	25.2282	61.463	76.3821	81.9866
45	9.91891	30.6669	72.219	100.982	121.068	128.64
60	12.0769	51.564	109.533	154.157	175.704	184.901
concentration	slope
0	0
100	0.1892
300	0.8437
500	1.8355
800	2.5693
1200	2.9425
1600	3.0807
