# Supplementary material for: Structural basis of phosphatidylcholine recognition by the C2–domain of cytosolic phospholipase A2α
Source: eLife journal article supplement (doi:10.7554/elife.44760), 2019-05-03
Supplement: supp [file 2018-02-23_kinetics KsA wt and mut 22 3mm Tx PAPC.xlsx]

## Sheet: Raw Data
	Sample Name		AA	AA d8
1	1		61000	36200
2	2		134000	37300
3	3		183000	40500
4	4		194000	40400
5	5		200000	43000
6	6		211000	43300
7	7		92500	38900
8	8		340000	42700
9	9		447000	46300
10	10		445000	43600
11	11		485000	45400
12	12		496000	45600
13	13		143000	38600
14	14		599000	42500
15	15		774000	45300
16	16		739000	45800
17	17		830000	47600
18	18		806000	44700
19	19		185000	39500
20	20		875000	45400
21	21		1080000	48300
22	22		1110000	48100
23	23		1130000	46500
24	24		1140000	45100
25	25		36400	35200
26	26		39000	36600
27	27		31300	36700
28	28		32900	35300
29	29		79900	38100
30	30		86700	38300
31	31		118000	40200
32	32		134000	41500
33	33		157000	42400
34	34		172000	41000
35	35		193000	43200
36	36		196000	42600
37	37		48500	36800
38	38		53500	35700
39	39		63700	37600
40	40		67800	38300
41	41		189000	41500
42	42		216000	41800
43	43		284000	42300
44	44		324000	43400
45	45		384000	43600
46	46		415000	44800
47	47		418000	46500
48	48		452000	43700
49	49		64200	37100
50	50		72700	36800
51	51		109000	39100
52	52		114000	37200
53	53		330000	42800
54	54		357000	41300
55	55		523000	44300
56	56		535000	44700
57	57		607000	45000
58	58		658000	44500
59	59		673000	46700
60	60		717000	46800
61	61		84200	36500
62	62		94900	36600
63	63		177000	39900
64	64		194000	39400
65	65		523000	42000
66	66		554000	42800
67	67		728000	45300
68	68		821000	45100
69	69		870000	44700
70	70		976000	46300
71	71		939000	46400
72	72		998000	44900

## Sheet: AA
	Sample Name	AA	AA d8		ng AA				gram of AA	mol AA	nmol AA	nmol AA/min	nmol AA/min/mg cpla2					19	N65D
1	100	61000	36200		67.4033				6.74033e-08	2.21381e-10	0.221381	0.00368969	14.7588					20	A94Y
2	300	134000	37300		143.7				1.437e-07	4.71972e-10	0.471972	0.00786619	31.4648					21	A94F
3	500	183000	40500		180.741				1.80741e-07	5.9363e-10	0.59363	0.00989384	39.5753					22	Y96A
4	800	194000	40400		192.079				1.92079e-07	6.30871e-10	0.630871	0.0105145	42.058
5	1200	200000	43000		186.047				1.86047e-07	6.11057e-10	0.611057	0.0101843	40.7371
6	1600	211000	43300		194.919				1.94919e-07	6.40198e-10	0.640198	0.01067	42.6799
7	100	92500	38900		95.1157				9.51157e-08	3.12401e-10	0.312401	0.00520668	20.8267
8	300	340000	42700		318.501				3.18501e-07	1.04609e-09	1.04609	0.0174349	69.7396
9	500	447000	46300		386.177				3.86177e-07	1.26837e-09	1.26837	0.0211395	84.5581
10	800	445000	43600		408.257				4.08257e-07	1.34089e-09	1.34089	0.0223482	89.3927
11	1200	485000	45400		427.313				4.27313e-07	1.40348e-09	1.40348	0.0233913	93.5652
12	1600	496000	45600		435.088				4.35088e-07	1.42901e-09	1.42901	0.0238169	95.2677
13	100	143000	38600		148.187				1.48187e-07	4.86708e-10	0.486708	0.0081118	32.4472
14	300	599000	42500		563.765				5.63765e-07	1.85165e-09	1.85165	0.0308608	123.443
15	500	774000	45300		683.444				6.83444e-07	2.24472e-09	2.24472	0.037412	149.648
16	800	739000	45800		645.415				6.45415e-07	2.11982e-09	2.11982	0.0353303	141.321
17	1200	830000	47600		697.479				6.97479e-07	2.29082e-09	2.29082	0.0381803	152.721
18	1600	806000	44700		721.253				7.21253e-07	2.3689e-09	2.3689	0.0394817	157.927
19	100	185000	39500		187.342				1.87342e-07	6.15311e-10	0.615311	0.0102552	41.0207
20	300	875000	45400		770.925				7.70925e-07	2.53205e-09	2.53205	0.0422008	168.803
21	500	1080000	48300		894.41				8.9441e-07	2.93763e-09	2.93763	0.0489604	195.842
22	800	1110000	48100		923.077				9.23077e-07	3.03178e-09	3.03178	0.0505297	202.119
23	1200	1130000	46500		972.043				9.72043e-07	3.19261e-09	3.19261	0.0532101	212.84
24	1600	1140000	45100		1011.09				1.01109e-06	3.32084e-09	3.32084	0.0553474	221.389
25	100	36400	35200		41.3636				4.13636e-08	1.35856e-10	0.135856	0.00226427	9.05706
26	100	39000	36600		42.623				4.2623e-08	1.39992e-10	0.139992	0.0023332	9.3328
27	300	31300	36700		34.1144				3.41144e-08	1.12046e-10	0.112046	0.00186744	7.46976
28	300	32900	35300		37.2805				3.72805e-08	1.22445e-10	0.122445	0.00204075	8.163
29	500	79900	38100		83.8845				8.38845e-08	2.75513e-10	0.275513	0.00459188	18.3675
30	500	86700	38300		90.5483				9.05483e-08	2.97399e-10	0.297399	0.00495666	19.8266
31	800	118000	40200		117.413				1.17413e-07	3.85634e-10	0.385634	0.00642724	25.709
32	800	134000	41500		129.157				1.29157e-07	4.24206e-10	0.424206	0.0070701	28.2804
33	1200	157000	42400		148.113				1.48113e-07	4.86467e-10	0.486467	0.00810779	32.4312
34	1200	172000	41000		167.805				1.67805e-07	5.51143e-10	0.551143	0.00918572	36.7429
35	1600	193000	43200		178.704				1.78704e-07	5.8694e-10	0.58694	0.00978233	39.1293
36	1600	196000	42600		184.038				1.84038e-07	6.04458e-10	0.604458	0.0100743	40.2972
37	100	48500	36800		52.7174				5.27174e-08	1.73147e-10	0.173147	0.00288578	11.5431
38	100	53500	35700		59.944				5.9944e-08	1.96882e-10	0.196882	0.00328136	13.1255
39	300	63700	37600		67.766				6.7766e-08	2.22572e-10	0.222572	0.00370954	14.8382
40	300	67800	38300		70.8094				7.08094e-08	2.32568e-10	0.232568	0.00387614	15.5046
41	500	189000	41500		182.169				1.82169e-07	5.9832e-10	0.59832	0.009972	39.888
42	500	216000	41800		206.699				2.06699e-07	6.78887e-10	0.678887	0.0113148	45.2591
43	800	284000	42300		268.558				2.68558e-07	8.82059e-10	0.882059	0.014701	58.804
44	800	324000	43400		298.618				2.98618e-07	9.80788e-10	0.980788	0.0163465	65.3859
45	1200	384000	43600		352.294				3.52294e-07	1.15708e-09	1.15708	0.0192847	77.1389
46	1200	415000	44800		370.536				3.70536e-07	1.217e-09	1.217	0.0202833	81.1332
47	1600	418000	46500		359.57				3.5957e-07	1.18098e-09	1.18098	0.019683	78.7321
48	1600	452000	43700		413.73				4.1373e-07	1.35887e-09	1.35887	0.0226478	90.5911
49	100	64200	37100		69.2183				6.92183e-08	2.27343e-10	0.227343	0.00378905	15.1562
50	100	72700	36800		79.0217				7.90217e-08	2.59541e-10	0.259541	0.00432569	17.3028
51	300	109000	39100		111.509				1.11509e-07	3.66243e-10	0.366243	0.00610405	24.4162
52	300	114000	37200		122.581				1.22581e-07	4.02607e-10	0.402607	0.00671012	26.8405
53	500	330000	42800		308.411				3.08411e-07	1.01295e-09	1.01295	0.0168826	67.5303
54	500	357000	41300		345.763				3.45763e-07	1.13563e-09	1.13563	0.0189272	75.7089
55	800	523000	44300		472.235				4.72235e-07	1.55102e-09	1.55102	0.0258504	103.401
56	800	535000	44700		478.747				4.78747e-07	1.57241e-09	1.57241	0.0262069	104.827
57	1200	607000	45000		539.556				5.39556e-07	1.77213e-09	1.77213	0.0295355	118.142
58	1200	658000	44500		591.461				5.91461e-07	1.94261e-09	1.94261	0.0323768	129.507
59	1600	673000	46700		576.445				5.76445e-07	1.89329e-09	1.89329	0.0315549	126.22
60	1600	717000	46800		612.821				6.12821e-07	2.01277e-09	2.01277	0.0335461	134.184
61	100	84200	36500		92.274				9.2274e-08	3.03067e-10	0.303067	0.00505112	20.2045
62	100	94900	36600		103.716				1.03716e-07	3.40647e-10	0.340647	0.00567746	22.7098
63	300	177000	39900		177.444				1.77444e-07	5.82801e-10	0.582801	0.00971335	38.8534
64	300	194000	39400		196.954				1.96954e-07	6.46883e-10	0.646883	0.0107814	43.1255
65	500	523000	42000		498.095				4.98095e-07	1.63596e-09	1.63596	0.027266	109.064
66	500	554000	42800		517.757				5.17757e-07	1.70054e-09	1.70054	0.0283423	113.369
67	800	728000	45300		642.826				6.42826e-07	2.11132e-09	2.11132	0.0351886	140.754
68	800	821000	45100		728.16				7.2816e-07	2.39159e-09	2.39159	0.0398598	159.439
69	1200	870000	44700		778.523				7.78523e-07	2.55701e-09	2.55701	0.0426168	170.467
70	1200	976000	46300		843.197				8.43197e-07	2.76942e-09	2.76942	0.046157	184.628
71	1600	939000	46400		809.483				8.09483e-07	2.65869e-09	2.65869	0.0443115	177.246
72	1600	998000	44900		889.087				8.89087e-07	2.92014e-09	2.92014	0.048669	194.676

## Sheet: conversion before graphs
				wt	100	300	500	800	1200	1600
100	14.7588			15	14.7588	31.4648	39.5753	42.058	40.7371	42.6799
300	31.4648			30	20.8267	69.7396	84.5581	89.3927	93.5652	95.2677
500	39.5753			45	32.4472	123.443	149.648	141.321	152.721	157.927
800	42.058			60	41.0207	168.803	195.842	202.119	212.84	221.389
1200	40.7371			mut22	100	300	500	800	1200	1600
1600	42.6799			0	0	0	0	0	0	0
100	20.8267			15	9.05706	7.46976	18.3675	25.709	32.4312	39.1293
300	69.7396			30	11.5431	14.8382	39.888	58.804	77.1389	78.7321
500	84.5581			45	15.1562	24.4162	67.5303	103.401	118.142	126.22
800	89.3927			60	20.2045	38.8534	109.064	140.754	170.467	177.246
1200	93.5652			mut22	100	300	500	800	1200	1600
1600	95.2677			0	0	0	0	0	0	0
100	32.4472			15	9.3328	8.163	19.8266	28.2804	36.7429	40.2972
300	123.443			30	13.1255	15.5046	45.2591	65.3859	81.1332	90.5911
500	149.648			45	17.3028	26.8405	75.7089	104.827	129.507	134.184
800	141.321			60	22.7098	43.1255	113.369	159.439	184.628	194.676
1200	152.721
1600	157.927
100	41.0207
300	168.803
500	195.842
800	202.119
1200	212.84
1600	221.389
100	9.05706
100	9.3328
300	7.46976
300	8.163
500	18.3675
500	19.8266
800	25.709
800	28.2804
1200	32.4312
1200	36.7429
1600	39.1293
1600	40.2972
100	11.5431
100	13.1255
300	14.8382
300	15.5046
500	39.888
500	45.2591
800	58.804
800	65.3859
1200	77.1389
1200	81.1332
1600	78.7321
1600	90.5911
100	15.1562
100	17.3028
300	24.4162
300	26.8405
500	67.5303
500	75.7089
800	103.401
800	104.827
1200	118.142
1200	129.507
1600	126.22
1600	134.184
100	20.2045
100	22.7098
300	38.8534
300	43.1255
500	109.064
500	113.369
800	140.754
800	159.439
1200	170.467
1200	184.628
1600	177.246
1600	194.676

## Sheet: WT
wt	100	300	500	800	1200	1600
0	0	0	0	0	0	0
15	14.7588	31.4648	39.5753	42.058	40.7371	42.6799
30	20.8267	69.7396	84.5581	89.3927	93.5652	95.2677
45	32.4472	123.443	149.648	141.321	152.721	157.927
60	41.0207	168.803	195.842	202.119	212.84	221.389
concentration	slope
0	0
100	0.6649
300	2.8639
500	3.345
800	3.3567
1200	3.5844
1600	3.7202

## Sheet: Mut22Y96A_1
mut22	100	300	500	800	1200	1600
0	0	0	0	0	0	0
15	9.05706	7.46976	18.3675	25.709	32.4312	39.1293
30	11.5431	14.8382	39.888	58.804	77.1389	78.7321
45	15.1562	24.4162	67.5303	103.401	118.142	126.22
60	20.2045	38.8534	109.064	140.754	170.467	177.246
concentration	slope
0	0
100	0.3101
300	0.631
500	1.7819
800	2.3947
1200	2.8443
1600	2.9439

## Sheet: Mut22_2
mut22	100	300	500	800	1200	1600
0	0	0	0	0	0	0
15	9.3328	8.163	19.8266	28.2804	36.7429	40.2972
30	13.1255	15.5046	45.2591	65.3859	81.1332	90.5911
45	17.3028	26.8405	75.7089	104.827	129.507	134.184
60	22.7098	43.1255	113.369	159.439	184.628	194.676
concentration	slope
0	0
100	0.3559
300	0.6995
500	1.8841
800	2.6362
1200	3.0801
1600	3.2216
