# Supplementary material for: Structural basis of phosphatidylcholine recognition by the C2–domain of cytosolic phospholipase A2α
Source: eLife journal article supplement (doi:10.7554/elife.44760), 2019-05-03
Supplement: supp [file 2018-03-05_kinetics KsA wt and mut 22 3mm Tx PAPC_02.xlsx]

## Sheet: Raw Data
	Sample Name		AA	AA d8
1	1		46100	30700
2	2		94400	32900
3	3		141000	34100
4	4		160000	35200
5	5		155000	35700
6	6		171000	37500
7	7		80300	33500
8	8		248000	36100
9	9		361000	37200
10	10		387000	37700
11	11		384000	39000
12	12		401000	39600
13	13		118000	37800
14	14		425000	37100
15	15		617000	37800
16	16		572000	39000
17	17		616000	40000
18	18		661000	40800
19	19		153000	42600
20	20		702000	39600
21	21		842000	38500
22	22		902000	40900
23	23		804000	41600
24	24		910000	41000
25	25		40500	33300
26	26		42000	33400
27	27		29800	34100
28	28		32700	31700
29	29		86100	35300
30	30		96800	35300
31	31		126000	36400
32	32		141000	35800
33	33		162000	36000
34	34		180000	37200
35	35		206000	40000
36	36		213000	38400
37	37		51700	33100
38	38		54700	33000
39	39		62400	32100
40	40		65300	33700
41	41		207000	36700
42	42		225000	36600
43	43		313000	37700
44	44		341000	38700
45	45		414000	40000
46	46		415000	39300
47	47		443000	39000
48	48		476000	41200
49	49		70100	34200
50	50		69000	32600
51	51		105000	34800
52	52		120000	34200
53	53		372000	39000
54	54		388000	36100
55	55		491000	39700
56	56		578000	38300
57	57		648000	40700
58	58		654000	37200
59	59		686000	39700
60	60		735000	39000
61	61		spilled tube during extraction, human error
62	62		90200	33400
63	63		175000	35400
64	64		186000	34500
65	65		553000	38600
66	66		596000	40200
67	67		774000	42500
68	68		791000	39200
69	69		869000	41500
70	70		980000	40000
71	71		990000	41600
72	72		993000	41500

## Sheet: AA
	Sample Name	AA	AA d8		ng AA				gram of AA	mol AA	nmol AA	nmol AA/min	nmol AA/min/mg cpla2					19	N65D
1	100	46100	30700		60.0651				6.00651e-08	1.9728e-10	0.19728	0.003288	13.152					20	A94Y
2	300	94400	32900		114.772				1.14772e-07	3.76961e-10	0.376961	0.00628268	25.1307					21	A94F
3	500	141000	34100		165.396				1.65396e-07	5.43231e-10	0.543231	0.00905385	36.2154					22	Y96A
4	800	160000	35200		181.818				1.81818e-07	5.97169e-10	0.597169	0.00995282	39.8113
5	1200	155000	35700		173.669				1.73669e-07	5.70405e-10	0.570405	0.00950675	38.027
6	1600	171000	37500		182.4				1.824e-07	5.9908e-10	0.59908	0.00998466	39.9387
7	100	80300	33500		95.8806				9.58806e-08	3.14913e-10	0.314913	0.00524855	20.9942
8	300	248000	36100		274.792				2.74792e-07	9.02536e-10	0.902536	0.0150423	60.169
9	500	361000	37200		388.172				3.88172e-07	1.27492e-09	1.27492	0.0212487	84.9949
10	800	387000	37700		410.61				4.1061e-07	1.34862e-09	1.34862	0.022477	89.908
11	1200	384000	39000		393.846				3.93846e-07	1.29356e-09	1.29356	0.0215593	86.2373
12	1600	401000	39600		405.051				4.05051e-07	1.33036e-09	1.33036	0.0221727	88.6906
13	100	118000	37800		124.868				1.24868e-07	4.10119e-10	0.410119	0.00683532	27.3413
14	300	425000	37100		458.221				4.58221e-07	1.50499e-09	1.50499	0.0250832	100.333
15	500	617000	37800		652.91				6.5291e-07	2.14444e-09	2.14444	0.0357406	142.962
16	800	572000	39000		586.667				5.86667e-07	1.92687e-09	1.92687	0.0321144	128.458
17	1200	616000	40000		616				6.16e-07	2.02321e-09	2.02321	0.0337201	134.881
18	1600	661000	40800		648.039				6.48039e-07	2.12844e-09	2.12844	0.035474	141.896
19	100	153000	42600		143.662				1.43662e-07	4.71848e-10	0.471848	0.00786413	31.4565
20	300	702000	39600		709.091				7.09091e-07	2.32896e-09	2.32896	0.038816	155.264
21	500	842000	38500		874.805				8.74805e-07	2.87324e-09	2.87324	0.0478873	191.549
22	800	902000	40900		882.152				8.82152e-07	2.89736e-09	2.89736	0.0482894	193.158
23	1200	804000	41600		773.077				7.73077e-07	2.53912e-09	2.53912	0.0423186	169.274
24	1600	910000	41000		887.805				8.87805e-07	2.91593e-09	2.91593	0.0485989	194.395
25	100	40500	33300		48.6486				4.86486e-08	1.59783e-10	0.159783	0.00266305	10.6522
26	100	42000	33400		50.2994				5.02994e-08	1.65205e-10	0.165205	0.00275341	11.0137
27	300	29800	34100		34.956				3.4956e-08	1.14811e-10	0.114811	0.00191351	7.65404
28	300	32700	31700		41.2618				4.12618e-08	1.35522e-10	0.135522	0.00225869	9.03477
29	500	86100	35300		97.5637				9.75637e-08	3.20441e-10	0.320441	0.00534069	21.3627
30	500	96800	35300		109.688				1.09688e-07	3.60264e-10	0.360264	0.0060044	24.0176
31	800	126000	36400		138.462				1.38462e-07	4.54767e-10	0.454767	0.00757945	30.3178
32	800	141000	35800		157.542				1.57542e-07	5.17435e-10	0.517435	0.00862392	34.4957
33	1200	162000	36000		180				1.8e-07	5.91197e-10	0.591197	0.00985329	39.4132
34	1200	180000	37200		193.548				1.93548e-07	6.35696e-10	0.635696	0.0105949	42.3797
35	1600	206000	40000		206				2.06e-07	6.76592e-10	0.676592	0.0112765	45.1062
36	1600	213000	38400		221.875				2.21875e-07	7.28733e-10	0.728733	0.0121455	48.5822
37	100	51700	33100		62.4773				6.24773e-08	2.05202e-10	0.205202	0.00342004	13.6802
38	100	54700	33000		66.303				6.6303e-08	2.17768e-10	0.217768	0.00362946	14.5178
39	300	62400	32100		77.757				7.7757e-08	2.55387e-10	0.255387	0.00425646	17.0258
40	300	65300	33700		77.5074				7.75074e-08	2.54568e-10	0.254568	0.00424279	16.9712
41	500	207000	36700		225.613				2.25613e-07	7.4101e-10	0.74101	0.0123502	49.4007
42	500	225000	36600		245.902				2.45902e-07	8.07647e-10	0.807647	0.0134608	53.8431
43	800	313000	37700		332.095				3.32095e-07	1.09074e-09	1.09074	0.0181791	72.7163
44	800	341000	38700		352.455				3.52455e-07	1.15761e-09	1.15761	0.0192935	77.1742
45	1200	414000	40000		414				4.14e-07	1.35975e-09	1.35975	0.0226626	90.6502
46	1200	415000	39300		422.392				4.22392e-07	1.38732e-09	1.38732	0.0231219	92.4877
47	1600	443000	39000		454.359				4.54359e-07	1.49231e-09	1.49231	0.0248718	99.4873
48	1600	476000	41200		462.136				4.62136e-07	1.51785e-09	1.51785	0.0252975	101.19
49	100	70100	34200		81.9883				8.19883e-08	2.69285e-10	0.269285	0.00448808	17.9523
50	100	69000	32600		84.6626				8.46626e-08	2.78068e-10	0.278068	0.00463447	18.5379
51	300	105000	34800		120.69				1.2069e-07	3.96397e-10	0.396397	0.00660661	26.4264
52	300	120000	34200		140.351				1.40351e-07	4.60973e-10	0.460973	0.00768288	30.7315
53	500	372000	39000		381.538				3.81538e-07	1.25314e-09	1.25314	0.0208856	83.5424
54	500	388000	36100		429.917				4.29917e-07	1.41203e-09	1.41203	0.0235339	94.1354
55	800	491000	39700		494.71				4.9471e-07	1.62484e-09	1.62484	0.0270807	108.323
56	800	578000	38300		603.655				6.03655e-07	1.98266e-09	1.98266	0.0330444	132.178
57	1200	648000	40700		636.855				6.36855e-07	2.09171e-09	2.09171	0.0348618	139.447
58	1200	654000	37200		703.226				7.03226e-07	2.3097e-09	2.3097	0.0384949	153.98
59	1600	686000	39700		691.184				6.91184e-07	2.27014e-09	2.27014	0.0378357	151.343
60	1600	735000	39000		753.846				7.53846e-07	2.47595e-09	2.47595	0.0412659	165.064
61	spilled tube during extraction, human error												spilled tube during extraction, human error	spilled tube during extraction, human error
62	100	90200	33400		108.024				1.08024e-07	3.54797e-10	0.354797	0.00591328	23.6531
63	300	175000	35400		197.74				1.9774e-07	6.49463e-10	0.649463	0.0108244	43.2976
64	300	186000	34500		215.652				2.15652e-07	7.08294e-10	0.708294	0.0118049	47.2196
65	500	553000	38600		573.057				5.73057e-07	1.88217e-09	1.88217	0.0313694	125.478
66	500	596000	40200		593.035				5.93035e-07	1.94778e-09	1.94778	0.032463	129.852
67	800	774000	42500		728.471				7.28471e-07	2.39261e-09	2.39261	0.0398768	159.507
68	800	791000	39200		807.143				8.07143e-07	2.651e-09	2.651	0.0441834	176.734
69	1200	869000	41500		837.59				8.3759e-07	2.75101e-09	2.75101	0.0458501	183.4
70	1200	980000	40000		980				9.8e-07	3.21874e-09	3.21874	0.0536457	214.583
71	1600	990000	41600		951.923				9.51923e-07	3.12652e-09	3.12652	0.0521087	208.435
72	1600	993000	41500		957.108				9.57108e-07	3.14355e-09	3.14355	0.0523926	209.57

## Sheet: conversion before graphs
				wt	100	300	500	800	1200	1600
100	13.152			15	13.152	25.1307	36.2154	39.8113	38.027	39.9387
300	25.1307			30	20.9942	60.169	84.9949	89.908	86.2373	88.6906
500	36.2154			45	27.3413	100.333	142.962	128.458	134.881	141.896
800	39.8113			60	31.4565	155.264	191.549	193.158	169.274	194.395
1200	38.027			mut22	100	300	500	800	1200	1600
1600	39.9387			0	0	0	0	0	0	0
100	20.9942			15	10.6522	7.65404	21.3627	30.3178	39.4132	45.1062
300	60.169			30	13.6802	17.0258	49.4007	72.7163	90.6502	99.4873
500	84.9949			45	17.9523	26.4264	83.5424	108.323	139.447	151.343
800	89.908			60	spilled tube during extraction, human error	43.2976	125.478	159.507	183.4	208.435
1200	86.2373			mut22	100	300	500	800	1200	1600
1600	88.6906			0	0	0	0	0	0	0
100	27.3413			15	11.0137	9.03477	24.0176	34.4957	42.3797	48.5822
300	100.333			30	14.5178	16.9712	53.8431	77.1742	92.4877	101.19
500	142.962			45	18.5379	30.7315	94.1354	132.178	153.98	165.064
800	128.458			60	23.6531	47.2196	129.852	176.734	214.583	209.57
1200	134.881
1600	141.896
100	31.4565
300	155.264
500	191.549
800	193.158
1200	169.274
1600	194.395
100	10.6522
100	11.0137
300	7.65404
300	9.03477
500	21.3627
500	24.0176
800	30.3178
800	34.4957
1200	39.4132
1200	42.3797
1600	45.1062
1600	48.5822
100	13.6802
100	14.5178
300	17.0258
300	16.9712
500	49.4007
500	53.8431
800	72.7163
800	77.1742
1200	90.6502
1200	92.4877
1600	99.4873
1600	101.19
100	17.9523
100	18.5379
300	26.4264
300	30.7315
500	83.5424
500	94.1354
800	108.323
800	132.178
1200	139.447
1200	153.98
1600	151.343
1600	165.064
100	spilled tube during extraction, human error
100	23.6531
300	43.2976
300	47.2196
500	125.478
500	129.852
800	159.507
800	176.734
1200	183.4
1200	214.583
1600	208.435
1600	209.57

## Sheet: WT
wt	100	300	500	800	1200	1600
0	0	0	0	0	0	0
15	13.152	25.1307	36.2154	39.8113	38.027	39.9387
30	20.9942	60.169	84.9949	89.908	86.2373	88.6906
45	27.3413	100.333	142.962	128.458	134.881	141.896
60	31.4565	155.264	191.549	193.158	169.274	194.395
concentration	slope
0	0
100	0.514
300	2.5715
500	3.2656
800	3.1664
1200	2.9027
1600	3.2717

## Sheet: Mut22Y96A_1
mut22	100	300	500	800	1200	1600
0	0	0	0	0	0	0
15	10.6522	7.65404	21.3627	30.3178	39.4132	45.1062
30	13.6802	17.0258	49.4007	72.7163	90.6502	99.4873
45	17.9523	26.4264	83.5424	108.323	139.447	151.343
60		43.2976	125.478	159.507	183.4	208.435
	spilled tube during extraction, human error
concentration	slope
0	0
100	0.3792
300	0.7025
500	2.0876
800	2.6468
1200	3.1122
1600	3.4874

## Sheet: Mut22_2
mut22	100	300	500	800	1200	1600
0	0	0	0	0	0	0
15	11.0137	9.03477	24.0176	34.4957	42.3797	48.5822
30	14.5178	16.9712	53.8431	77.1742	92.4877	101.19
45	18.5379	30.7315	94.1354	132.178	153.98	165.064
60	23.6531	47.2196	129.852	176.734	214.583	209.57
concentration	slope
0	0
100	0.3655
300	0.7742
500	2.1988
800	3.0077
1200	3.6051
1600	3.5708
