# Supplementary material for: Structural basis of phosphatidylcholine recognition by the C2–domain of cytosolic phospholipase A2α
Source: eLife journal article supplement (doi:10.7554/elife.44760), 2019-05-03
Supplement: supp [file 2018-03-07_kinetics KsA wt and mut 17 3mm Tx PAPC.xlsx]

## Sheet: Raw Data
	Sample Name		AA	AA d8
1	1		54300	36300
2	2		167000	40800
3	3		216000	42200
4	4		229000	42100
5	5		245000	43400
6	6		269000	47900
7	7		95500	38000
8	8		435000	43900
9	9		526000	43500
10	10		556000	44500
11	11		532000	46500
12	12		609000	50000
13	13		155000	39600
14	14		746000	46200
15	15		868000	43800
16	16		926000	48000
17	17		933000	46100
18	18		1020000	52000
19	19		218000	40600
20	20		1030000	44100
21	21		1270000	45000
22	22		1210000	44200
23	23		1320000	45200
24	24		1400000	53300
25	25		56600	38400
26	26		55000	36600
27	27		131000	40600
28	28		144000	41900
29	29		193000	42500
30	30		218000	43300
31	31		220000	45700
32	32		250000	44900
33	33		247000	48500
34	34		275000	47300
35	35		280000	47500
36	36		295000	46600
37	37		77400	37000
38	38		83700	37000
39	39		350000	44100
40	40		370000	43900
41	41		495000	44800
42	42		564000	46000
43	43		553000	47300
44	44		571000	45800
45	45		579000	47000
46	46		636000	47500
47	47		596000	50300
48	48		664000	48600
49	49		100000	38500
50	50		112000	37900
51	51		629000	45400
52	52		691000	44200
53	53		824000	46500
54	54		920000	48900
55	55		915000	45800
56	56		977000	46800
57	57		901000	46400
58	58		1020000	49800
59	59		976000	50500
60	60		1030000	46200
61	61		133000	37200
62	62		134000	38100
63	63		936000	46500
64	64		1040000	48000
65	65		1190000	48000
66	66		1290000	46700
67	67		1240000	45400
68	68		1360000	47700
69	69		1330000	48300
70	70		1440000	48800
71	71		1350000	46700
72	72		1500000	51200

## Sheet: AA
	Sample Name	AA	AA d8		ng AA				gram of AA	mol AA	nmol AA	nmol AA/min	nmol AA/min/mg cpla2					19	N65D
1	100	54300	36300		59.8347				5.98347e-08	1.96523e-10	0.196523	0.00327538	13.1015					20	A94Y
2	300	167000	40800		163.725				1.63725e-07	5.37745e-10	0.537745	0.00896241	35.8497					21	A94F
3	500	216000	42200		204.739				2.04739e-07	6.72452e-10	0.672452	0.0112075	44.8301					22	Y96A
4	800	229000	42100		217.577				2.17577e-07	7.14617e-10	0.714617	0.0119103	47.6411
5	1200	245000	43400		225.806				2.25806e-07	7.41645e-10	0.741645	0.0123608	49.443
6	1600	269000	47900		224.635				2.24635e-07	7.37797e-10	0.737797	0.0122966	49.1864
7	100	95500	38000		100.526				1.00526e-07	3.30172e-10	0.330172	0.00550286	22.0114
8	300	435000	43900		396.355				3.96355e-07	1.3018e-09	1.3018	0.0216967	86.7867
9	500	526000	43500		483.678				4.83678e-07	1.58861e-09	1.58861	0.0264768	105.907
10	800	556000	44500		499.775				4.99775e-07	1.64148e-09	1.64148	0.0273579	109.432
11	1200	532000	46500		457.634				4.57634e-07	1.50307e-09	1.50307	0.0250511	100.205
12	1600	609000	50000		487.2				4.872e-07	1.60017e-09	1.60017	0.0266696	106.678
13	100	155000	39600		156.566				1.56566e-07	5.14229e-10	0.514229	0.00857048	34.2819
14	300	746000	46200		645.887				6.45887e-07	2.12137e-09	2.12137	0.0353562	141.425
15	500	868000	43800		792.694				7.92694e-07	2.60355e-09	2.60355	0.0433925	173.57
16	800	926000	48000		771.667				7.71667e-07	2.53448e-09	2.53448	0.0422414	168.966
17	1200	933000	46100		809.544				8.09544e-07	2.65889e-09	2.65889	0.0443149	177.259
18	1600	1020000	52000		784.615				7.84615e-07	2.57701e-09	2.57701	0.0429502	171.801
19	100	218000	40600		214.778				2.14778e-07	7.05424e-10	0.705424	0.0117571	47.0283
20	300	1030000	44100		934.24				9.3424e-07	3.06845e-09	3.06845	0.0511408	204.563
21	500	1270000	45000		1128.89				1.12889e-06	3.70776e-09	3.70776	0.0617959	247.184
22	800	1210000	44200		1095.02				1.09502e-06	3.59652e-09	3.59652	0.0599421	239.768
23	1200	1320000	45200		1168.14				1.16814e-06	3.83668e-09	3.83668	0.0639446	255.779
24	1600	1400000	53300		1050.66				1.05066e-06	3.45081e-09	3.45081	0.0575135	230.054
25	100	56600	38400		58.9583				5.89583e-08	1.93644e-10	0.193644	0.00322741	12.9096
26	100	55000	36600		60.1093				6.01093e-08	1.97425e-10	0.197425	0.00329041	13.1616
27	300	131000	40600		129.064				1.29064e-07	4.23902e-10	0.423902	0.00706503	28.2601
28	300	144000	41900		137.47				1.3747e-07	4.51511e-10	0.451511	0.00752518	30.1007
29	500	193000	42500		181.647				1.81647e-07	5.96607e-10	0.596607	0.00994345	39.7738
30	500	218000	43300		201.386				2.01386e-07	6.61437e-10	0.661437	0.011024	44.0958
31	800	220000	45700		192.56				1.9256e-07	6.3245e-10	0.63245	0.0105408	42.1634
32	800	250000	44900		222.717				2.22717e-07	7.31499e-10	0.731499	0.0121916	48.7666
33	1200	247000	48500		203.711				2.03711e-07	6.69075e-10	0.669075	0.0111513	44.605
34	1200	275000	47300		232.558				2.32558e-07	7.63821e-10	0.763821	0.0127303	50.9214
35	1600	280000	47500		235.789				2.35789e-07	7.74434e-10	0.774434	0.0129072	51.6289
36	1600	295000	46600		253.219				2.53219e-07	8.3168e-10	0.83168	0.0138613	55.4453
37	100	77400	37000		83.6757				8.36757e-08	2.74827e-10	0.274827	0.00458045	18.3218
38	100	83700	37000		90.4865				9.04865e-08	2.97196e-10	0.297196	0.00495327	19.8131
39	300	350000	44100		317.46				3.1746e-07	1.04268e-09	1.04268	0.0173779	69.5117
40	300	370000	43900		337.13				3.3713e-07	1.10728e-09	1.10728	0.0184547	73.8186
41	500	495000	44800		441.964				4.41964e-07	1.4516e-09	1.4516	0.0241933	96.7734
42	500	564000	46000		490.435				4.90435e-07	1.6108e-09	1.6108	0.0268466	107.387
43	800	553000	47300		467.653				4.67653e-07	1.53597e-09	1.53597	0.0255996	102.398
44	800	571000	45800		498.69				4.9869e-07	1.63791e-09	1.63791	0.0272985	109.194
45	1200	579000	47000		492.766				4.92766e-07	1.61845e-09	1.61845	0.0269742	107.897
46	1200	636000	47500		535.579				5.35579e-07	1.75907e-09	1.75907	0.0293179	117.271
47	1600	596000	50300		473.956				4.73956e-07	1.55668e-09	1.55668	0.0259446	103.778
48	1600	664000	48600		546.502				5.46502e-07	1.79495e-09	1.79495	0.0299158	119.663
49	100	100000	38500		103.896				1.03896e-07	3.41239e-10	0.341239	0.00568732	22.7493
50	100	112000	37900		118.206				1.18206e-07	3.88239e-10	0.388239	0.00647064	25.8826
51	300	629000	45400		554.185				5.54185e-07	1.82018e-09	1.82018	0.0303364	121.345
52	300	691000	44200		625.339				6.25339e-07	2.05388e-09	2.05388	0.0342314	136.926
53	500	824000	46500		708.817				7.08817e-07	2.32806e-09	2.32806	0.038801	155.204
54	500	920000	48900		752.556				7.52556e-07	2.47172e-09	2.47172	0.0411953	164.781
55	800	915000	45800		799.127				7.99127e-07	2.62467e-09	2.62467	0.0437446	174.978
56	800	977000	46800		835.043				8.35043e-07	2.74264e-09	2.74264	0.0457106	182.843
57	1200	901000	46400		776.724				7.76724e-07	2.5511e-09	2.5511	0.0425183	170.073
58	1200	1020000	49800		819.277				8.19277e-07	2.69086e-09	2.69086	0.0448476	179.391
59	1600	976000	50500		773.069				7.73069e-07	2.53909e-09	2.53909	0.0423182	169.273
60	1600	1030000	46200		891.775				8.91775e-07	2.92897e-09	2.92897	0.0488162	195.265
61	100	133000	37200		143.011				1.43011e-07	4.69709e-10	0.469709	0.00782848	31.3139
62	100	134000	38100		140.682				1.40682e-07	4.62061e-10	0.462061	0.00770102	30.8041
63	300	936000	46500		805.161				8.05161e-07	2.6445e-09	2.6445	0.0440749	176.3
64	300	1040000	48000		866.667				8.66667e-07	2.84651e-09	2.84651	0.0474418	189.767
65	500	1190000	48000		991.667				9.91667e-07	3.25706e-09	3.25706	0.0542843	217.137
66	500	1290000	46700		1104.93				1.10493e-06	3.62905e-09	3.62905	0.0604841	241.937
67	800	1240000	45400		1092.51				1.09251e-06	3.58828e-09	3.58828	0.0598046	239.218
68	800	1360000	47700		1140.46				1.14046e-06	3.74576e-09	3.74576	0.0624294	249.718
69	1200	1330000	48300		1101.45				1.10145e-06	3.61763e-09	3.61763	0.0602939	241.175
70	1200	1440000	48800		1180.33				1.18033e-06	3.8767e-09	3.8767	0.0646117	258.447
71	1600	1350000	46700		1156.32				1.15632e-06	3.79784e-09	3.79784	0.0632974	253.189
72	1600	1500000	51200		1171.88				1.17187e-06	3.84894e-09	3.84894	0.064149	256.596
										50ng enzyme	double triton water mixture
										50
										100

## Sheet: conversion before graphs
				wt	100	300	500	800	1200	1600
100	13.1015			15	13.1015	35.8497	44.8301	47.6411	49.443	49.1864
300	35.8497			30	22.0114	86.7867	105.907	109.432	100.205	106.678
500	44.8301			45	34.2819	141.425	173.57	168.966	177.259	171.801
800	47.6411			60	47.0283	204.563	247.184	239.768	255.779	230.054
1200	49.443			mut17	100	300	500	800	1200	1600
1600	49.1864			0	0	0	0	0	0	0
100	22.0114			15	12.9096	28.2601	39.7738	42.1634	44.605	51.6289
300	86.7867			30	18.3218	69.5117	96.7734	102.398	107.897	103.778
500	105.907			45	22.7493	121.345	155.204	174.978	170.073	169.273
800	109.432			60	31.3139	176.3	217.137	239.218	241.175	253.189
1200	100.205			mut17	100	300	500	800	1200	1600
1600	106.678			0	0	0	0	0	0	0
100	34.2819			15	13.1616	30.1007	44.0958	48.7666	50.9214	55.4453
300	141.425			30	19.8131	73.8186	107.387	109.194	117.271	119.663
500	173.57			45	25.8826	136.926	164.781	182.843	179.391	195.265
800	168.966			60	30.8041	189.767	241.937	249.718	258.447	256.596
1200	177.259
1600	171.801
100	47.0283
300	204.563
500	247.184
800	239.768
1200	255.779
1600	230.054
100	12.9096
100	13.1616
300	28.2601
300	30.1007
500	39.7738
500	44.0958
800	42.1634
800	48.7666
1200	44.605
1200	50.9214
1600	51.6289
1600	55.4453
100	18.3218
100	19.8131
300	69.5117
300	73.8186
500	96.7734
500	107.387
800	102.398
800	109.194
1200	107.897
1200	117.271
1600	103.778
1600	119.663
100	22.7493
100	25.8826
300	121.345
300	136.926
500	155.204
500	164.781
800	174.978
800	182.843
1200	170.073
1200	179.391
1600	169.273
1600	195.265
100	31.3139
100	30.8041
300	176.3
300	189.767
500	217.137
500	241.937
800	239.218
800	249.718
1200	241.175
1200	258.447
1600	253.189
1600	256.596

## Sheet: WT
wt	100	300	500	800	1200	1600
0	0	0	0	0	0	0
15	13.1015	35.8497	44.8301	47.6411	49.443	49.1864
30	22.0114	86.7867	105.907	109.432	100.205	106.678
45	34.2819	141.425	173.57	168.966	177.259	171.801
60	47.0283	204.563	247.184	239.768	255.779	230.054
concentration	slope
0	0
100	0.7682
300	3.4313
500	4.154
800	4.0057
1200	4.2625
1600	3.8848

## Sheet: Mut17N64A_1
mut17	100	300	500	800	1200	1600
0	0	0	0	0	0	0
15	12.9096	28.2601	39.7738	42.1634	44.605	51.6289
30	18.3218	69.5117	96.7734	102.398	107.897	103.778
45	22.7493	121.345	155.204	174.978	170.073	169.273
60	31.3139	176.3	217.137	239.218	241.175	253.189
concentration	slope
0	0
100	0.4831
300	2.9712
500	3.6647
800	4.075
1200	4.0521
1600	4.1602

## Sheet: Mut17N64A_2
mut17	100	300	500	800	1200	1600
0	0	0	0	0	0	0
15	13.1616	30.1007	44.0958	48.7666	50.9214	55.4453
30	19.8131	73.8186	107.387	109.194	117.271	119.663
45	25.8826	136.926	164.781	182.843	179.391	195.265
60	30.8041	189.767	241.937	249.718	258.447	256.596
concentration	slope
0	0
100	0.4955
300	3.2424
500	4.0304
800	4.2234
1200	4.3024
1600	4.3534
