# Supplementary material for: Structural basis of phosphatidylcholine recognition by the C2–domain of cytosolic phospholipase A2α
Source: eLife journal article supplement (doi:10.7554/elife.44760), 2019-05-03
Supplement: supp [file 2018-03-08_kinetics KsA wt and mut 17 3mm Tx PAPC_02.xlsx]

## Sheet: Raw Data
	Sample Name		AA	AA d8
1	1		64400	39600
2	2		198000	43500
3	3		241000	44700
4	4		271000	47800
5	5		279000	47700
6	6		301000	50000
7	7		108000	40500
8	8		469000	48100
9	9		588000	47100
10	10		582000	48200
11	11		659000	50200
12	12		653000	51300
13	13		151000	41700
14	14		868000	49200
15	15		975000	46700
16	16		1040000	48200
17	17		1050000	49700
18	18		1030000	52600
19	19		209000	43400
20	20		1190000	48700
21	21		1170000	46300
22	22		1450000	48200
23	23		1440000	48600
24	24		1460000	51300
25	25		59000	41500
26	26		60500	40100
27	27		158000	44800
28	28		177000	44700
29	29		229000	46400
30	30		264000	46900
31	31		264000	48900
32	32		285000	47500
33	33		292000	49900
34	34		326000	50800
35	35		294000	49400
36	36		338000	51200
37	37		77000	40000
38	38		97900	39300
39	39		436000	47600
40	40		414000	48000
41	41		575000	46000
42	42		620000	49300
43	43		632000	47900
44	44		698000	48600
45	45		716000	52400
46	46		754000	50800
47	47		658000	51600
48	48		750000	51400
49	49		107000	43000
50	50		119000	41200
51	51		747000	50500
52	52		791000	48900
53	53		958000	49400
54	54		991000	48600
55	55		980000	49900
56	56		1080000	47100
57	57		1060000	51700
58	58		1140000	51200
59	59		1060000	51100
60	60		1170000	49600
61	61		137000	41600
62	62		150000	41300
63	63		1050000	50300
64	64		1160000	49100
65	65		1310000	47500
66	66		1380000	46700
67	67		1310000	48500
68	68		1520000	47200
69	69		1430000	51100
70	70		1540000	51100
71	71		1480000	51800
72	72		1590000	50000

## Sheet: AA
	Sample Name	AA	AA d8		ng AA				gram of AA	mol AA	nmol AA	nmol AA/min	nmol AA/min/mg cpla2					19	N65D
1	100	64400	39600		65.0505				6.50505e-08	2.13654e-10	0.213654	0.0035609	14.2436					20	A94Y
2	300	198000	43500		182.069				1.82069e-07	5.97993e-10	0.597993	0.00996654	39.8662					21	A94F
3	500	241000	44700		215.66				2.1566e-07	7.0832e-10	0.70832	0.0118053	47.2213					22	Y96A
4	800	271000	47800		226.778				2.26778e-07	7.44837e-10	0.744837	0.012414	49.6558
5	1200	279000	47700		233.962				2.33962e-07	7.68433e-10	0.768433	0.0128072	51.2288
6	1600	301000	50000		240.8				2.408e-07	7.90891e-10	0.790891	0.0131815	52.726
7	100	108000	40500		106.667				1.06667e-07	3.50339e-10	0.350339	0.00583899	23.3559
8	300	469000	48100		390.021				3.90021e-07	1.281e-09	1.281	0.0213499	85.3997
9	500	588000	47100		499.363				4.99363e-07	1.64012e-09	1.64012	0.0273354	109.342
10	800	582000	48200		482.988				4.82988e-07	1.58634e-09	1.58634	0.026439	105.756
11	1200	659000	50200		525.1				5.251e-07	1.72465e-09	1.72465	0.0287442	114.977
12	1600	653000	51300		509.162				5.09162e-07	1.67231e-09	1.67231	0.0278718	111.487
13	100	151000	41700		144.844				1.44844e-07	4.7573e-10	0.47573	0.00792884	31.7154
14	300	868000	49200		705.691				7.05691e-07	2.31779e-09	2.31779	0.0386299	154.519
15	500	975000	46700		835.118				8.35118e-07	2.74289e-09	2.74289	0.0457148	182.859
16	800	1040000	48200		863.071				8.63071e-07	2.83469e-09	2.83469	0.0472449	188.98
17	1200	1050000	49700		845.07				8.4507e-07	2.77557e-09	2.77557	0.0462596	185.038
18	1600	1030000	52600		783.27				7.8327e-07	2.57259e-09	2.57259	0.0428766	171.506
19	100	209000	43400		192.627				1.92627e-07	6.32669e-10	0.632669	0.0105445	42.1779
20	300	1190000	48700		977.413				9.77413e-07	3.21024e-09	3.21024	0.053504	214.016
21	500	1170000	46300		1010.8				1.0108e-06	3.3199e-09	3.3199	0.0553316	221.327
22	800	1450000	48200		1203.32				1.20332e-06	3.95222e-09	3.95222	0.0658703	263.481
23	1200	1440000	48600		1185.19				1.18519e-06	3.89266e-09	3.89266	0.0648776	259.51
24	1600	1460000	51300		1138.4				1.1384e-06	3.739e-09	3.739	0.0623167	249.267
25	100	59000	41500		56.8675				5.68675e-08	1.86777e-10	0.186777	0.00311295	12.4518
26	100	60500	40100		60.3491				6.03491e-08	1.98212e-10	0.198212	0.00330354	13.2142
27	300	158000	44800		141.071				1.41071e-07	4.63339e-10	0.463339	0.00772232	30.8893
28	300	177000	44700		158.389				1.58389e-07	5.20218e-10	0.520218	0.00867031	34.6812
29	500	229000	46400		197.414				1.97414e-07	6.48392e-10	0.648392	0.0108065	43.2261
30	500	264000	46900		225.16				2.2516e-07	7.39522e-10	0.739522	0.0123254	49.3015
31	800	264000	48900		215.951				2.15951e-07	7.09276e-10	0.709276	0.0118213	47.285
32	800	285000	47500		240				2.4e-07	7.88263e-10	0.788263	0.0131377	52.5509
33	1200	292000	49900		234.068				2.34068e-07	7.6878e-10	0.76878	0.012813	51.252
34	1200	326000	50800		256.693				2.56693e-07	8.4309e-10	0.84309	0.0140515	56.206
35	1600	294000	49400		238.057				2.38057e-07	7.8188e-10	0.78188	0.0130313	52.1254
36	1600	338000	51200		264.062				2.64063e-07	8.67295e-10	0.867295	0.0144549	57.8196
37	100	77000	40000		77				7.7e-08	2.52901e-10	0.252901	0.00421502	16.8601
38	100	97900	39300		99.6438				9.96438e-08	3.27273e-10	0.327273	0.00545455	21.8182
39	300	436000	47600		366.387				3.66387e-07	1.20337e-09	1.20337	0.0200562	80.2247
40	300	414000	48000		345				3.45e-07	1.13313e-09	1.13313	0.0188855	75.5419
41	500	575000	46000		500				5e-07	1.64221e-09	1.64221	0.0273702	109.481
42	500	620000	49300		503.043				5.03043e-07	1.65221e-09	1.65221	0.0275368	110.147
43	800	632000	47900		527.766				5.27766e-07	1.73341e-09	1.73341	0.0288902	115.561
44	800	698000	48600		574.486				5.74486e-07	1.88686e-09	1.88686	0.0314476	125.79
45	1200	716000	52400		546.565				5.46565e-07	1.79515e-09	1.79515	0.0299192	119.677
46	1200	754000	50800		593.701				5.93701e-07	1.94997e-09	1.94997	0.0324995	129.998
47	1600	658000	51600		510.078				5.10078e-07	1.67531e-09	1.67531	0.0279219	111.688
48	1600	750000	51400		583.658				5.83658e-07	1.91698e-09	1.91698	0.0319497	127.799
49	100	107000	43000		99.5349				9.95349e-08	3.26915e-10	0.326915	0.00544859	21.7944
50	100	119000	41200		115.534				1.15534e-07	3.79463e-10	0.379463	0.00632439	25.2975
51	300	747000	50500		591.683				5.91683e-07	1.94334e-09	1.94334	0.032389	129.556
52	300	791000	48900		647.035				6.47035e-07	2.12514e-09	2.12514	0.035419	141.676
53	500	958000	49400		775.709				7.75709e-07	2.54776e-09	2.54776	0.0424627	169.851
54	500	991000	48600		815.638				8.15638e-07	2.6789e-09	2.6789	0.0446484	178.594
55	800	980000	49900		785.571				7.85571e-07	2.58015e-09	2.58015	0.0430025	172.01
56	800	1080000	47100		917.197				9.17197e-07	3.01247e-09	3.01247	0.0502078	200.831
57	1200	1060000	51700		820.116				8.20116e-07	2.69361e-09	2.69361	0.0448936	179.574
58	1200	1140000	51200		890.625				8.90625e-07	2.92519e-09	2.92519	0.0487532	195.013
59	1600	1060000	51100		829.746				8.29746e-07	2.72524e-09	2.72524	0.0454207	181.683
60	1600	1170000	49600		943.548				9.43548e-07	3.09902e-09	3.09902	0.0516503	206.601
61	100	137000	41600		131.731				1.31731e-07	4.3266e-10	0.43266	0.00721101	28.844
62	100	150000	41300		145.278				1.45278e-07	4.77157e-10	0.477157	0.00795261	31.8105
63	300	1050000	50300		834.99				8.3499e-07	2.74247e-09	2.74247	0.0457078	182.831
64	300	1160000	49100		945.01				9.4501e-07	3.10382e-09	3.10382	0.0517303	206.921
65	500	1310000	47500		1103.16				1.10316e-06	3.62324e-09	3.62324	0.0603874	241.55
66	500	1380000	46700		1182.01				1.18201e-06	3.88224e-09	3.88224	0.064704	258.816
67	800	1310000	48500		1080.41				1.08041e-06	3.54854e-09	3.54854	0.0591423	236.569
68	800	1520000	47200		1288.14				1.28814e-06	4.23079e-09	4.23079	0.0705132	282.053
69	1200	1430000	51100		1119.37				1.11937e-06	3.6765e-09	3.6765	0.0612751	245.1
70	1200	1540000	51100		1205.48				1.20548e-06	3.95931e-09	3.95931	0.0659885	263.954
71	1600	1480000	51800		1142.86				1.14286e-06	3.75363e-09	3.75363	0.0625606	250.242
72	1600	1590000	50000		1272				1.272e-06	4.17779e-09	4.17779	0.0696299	278.52

## Sheet: conversion before graphs
				wt	100	300	500	800	1200	1600
100	14.2436			15	14.2436	39.8662	47.2213	49.6558	51.2288	52.726
300	39.8662			30	23.3559	85.3997	109.342	105.756	114.977	111.487
500	47.2213			45	31.7154	154.519	182.859	188.98	185.038	171.506
800	49.6558			60	42.1779	214.016	221.327	263.481	259.51	249.267
1200	51.2288			mut17	100	300	500	800	1200	1600
1600	52.726			0	0	0	0	0	0	0
100	23.3559			15	12.4518	30.8893	43.2261	47.285	51.252	52.1254
300	85.3997			30	16.8601	80.2247	109.481	115.561	119.677	111.688
500	109.342			45	21.7944	129.556	169.851	172.01	179.574	181.683
800	105.756			60	28.844	182.831	241.55	236.569	245.1	250.242
1200	114.977			mut17	100	300	500	800	1200	1600
1600	111.487			0	0	0	0	0	0	0
100	31.7154			15	13.2142	34.6812	49.3015	52.5509	56.206	57.8196
300	154.519			30	21.8182	75.5419	110.147	125.79	129.998	127.799
500	182.859			45	25.2975	141.676	178.594	200.831	195.013	206.601
800	188.98			60	31.8105	206.921	258.816	282.053	263.954	278.52
1200	185.038
1600	171.506
100	42.1779
300	214.016
500	221.327
800	263.481
1200	259.51
1600	249.267
100	12.4518
100	13.2142
300	30.8893
300	34.6812
500	43.2261
500	49.3015
800	47.285
800	52.5509
1200	51.252
1200	56.206
1600	52.1254
1600	57.8196
100	16.8601
100	21.8182
300	80.2247
300	75.5419
500	109.481
500	110.147
800	115.561
800	125.79
1200	119.677
1200	129.998
1600	111.688
1600	127.799
100	21.7944
100	25.2975
300	129.556
300	141.676
500	169.851
500	178.594
800	172.01
800	200.831
1200	179.574
1200	195.013
1600	181.683
1600	206.601
100	28.844
100	31.8105
300	182.831
300	206.921
500	241.55
500	258.816
800	236.569
800	282.053
1200	245.1
1200	263.954
1600	250.242
1600	278.52

## Sheet: WT
wt	100	300	500	800	1200	1600
0	0	0	0	0	0	0
15	14.2436	39.8662	47.2213	49.6558	51.2288	52.726
30	23.3559	85.3997	109.342	105.756	114.977	111.487
45	31.7154	154.519	182.859	188.98	185.038	171.506
60	42.1779	214.016	221.327	263.481	259.51	249.267
concentration	slope
0	0
100	0.6789
300	3.6179
500	3.8553
800	4.4419
1200	4.3522
1600	4.1154

## Sheet: Mut17N64A_1
mut17	100	300	500	800	1200	1600
0	0	0	0	0	0	0
15	12.4518	30.8893	43.2261	47.285	51.252	52.1254
30	16.8601	80.2247	109.481	115.561	119.677	111.688
45	21.7944	129.556	169.851	172.01	179.574	181.683
60	28.844	182.831	241.55	236.569	245.1	250.242
concentration	slope
0	0
100	0.4469
300	3.0955
500	4.0648
800	3.9858
1200	4.1235
1600	4.2003

## Sheet: Mut17N64A_2
mut17	100	300	500	800	1200	1600
0	0	0	0	0	0	0
15	13.2142	34.6812	49.3015	52.5509	56.206	57.8196
30	21.8182	75.5419	110.147	125.79	129.998	127.799
45	25.2975	141.676	178.594	200.831	195.013	206.601
60	31.8105	206.921	258.816	282.053	263.954	278.52
concentration	slope
0	0
100	0.5047
300	3.4772
500	4.3128
800	4.7492
1200	4.4448
1600	4.7055
