# Supplementary material for: Structural basis of phosphatidylcholine recognition by the C2–domain of cytosolic phospholipase A2α
Source: eLife journal article supplement (doi:10.7554/elife.44760), 2019-05-03
Supplement: supp [file 2018-03-12_kinetics KsA wt and mut 23 3mm Tx PAPC.xlsx]

## Sheet: Raw Data
	Sample Name		AA	AA d8
1	1		41300	23600
2	2		108000	24900
3	3		139000	25300
4	4		148000	26900
5	5		167000	29500
6	6		153000	26600
7	7		67000	25100
8	8		322000	28300
9	9		387000	29300
10	10		411000	29600
11	11		407000	30200
12	12		435000	30000
13	13		121000	26300
14	14		566000	31100
15	15		677000	32000
16	16		738000	32400
17	17		688000	32300
18	18		713000	32100
19	19		166000	26200
20	20		817000	36100
21	21		988000	34700
22	22		1070000	34400
23	23		1070000	33300
24	24		1030000	33300
25	25		82500	41500
26	26		89100	42400
27	27		204000	44500
28	28		222000	45300
29	29		256000	47700
30	30		278000	46500
31	31		286000	46200
32	32		315000	48200
33	33		299000	48300
34	34		339000	51400
35	35		326000	50600
36	36		338000	49600
37	37		122000	42500
38	38		127000	41300
39	39		502000	47400
40	40		557000	48200
41	41		614000	49200
42	42		711000	51600
43	43		715000	51100
44	44		732000	47300
45	45		678000	49200
46	46		736000	50600
47	47		682000	50200
48	48		775000	52900
49	49		156000	42600
50	50		180000	42200
51	51		810000	47600
52	52		917000	48700
53	53		1050000	48700
54	54		1080000	48300
55	55		1070000	50500
56	56		1200000	49400
57	57		1110000	51700
58	58		1230000	49500
59	59		1090000	53200
60	60		1190000	51100
61	61		202000	42800
62	62		236000	42800
63	63		1250000	50500
64	64		1310000	48300
65	65		1400000	49700
66	66		1520000	47700
67	67		1560000	49900
68	68		1990000	49800
69	69		1490000	52100
70	70		1670000	48200
71	71		1520000	51500
72	72		1680000	48600

## Sheet: AA
	Sample Name	AA	AA d8		ng AA				gram of AA	mol AA	nmol AA	nmol AA/min	nmol AA/min/mg cpla2					19	N65D
1	100	41300	23600		70				7e-08	2.2991e-10	0.22991	0.00383183	15.3273					20	A94Y
2	300	108000	24900		173.494				1.73494e-07	5.69829e-10	0.569829	0.00949714	37.9886					21	A94F
3	500	139000	25300		219.763				2.19763e-07	7.21796e-10	0.721796	0.0120299	48.1197					22	Y96A
4	800	148000	26900		220.074				2.20074e-07	7.22819e-10	0.722819	0.012047	48.1879
5	1200	167000	29500		226.441				2.26441e-07	7.43728e-10	0.743728	0.0123955	49.5819
6	1600	153000	26600		230.075				2.30075e-07	7.55666e-10	0.755666	0.0125944	50.3777
7	100	67000	25100		106.773				1.06773e-07	3.50688e-10	0.350688	0.0058448	23.3792
8	300	322000	28300		455.124				4.55124e-07	1.49482e-09	1.49482	0.0249137	99.6548
9	500	387000	29300		528.328				5.28328e-07	1.73525e-09	1.73525	0.0289209	115.684
10	800	411000	29600		555.405				5.55405e-07	1.82419e-09	1.82419	0.0304032	121.613
11	1200	407000	30200		539.073				5.39073e-07	1.77055e-09	1.77055	0.0295091	118.036
12	1600	435000	30000		580				5.8e-07	1.90497e-09	1.90497	0.0317495	126.998
13	100	121000	26300		184.03				1.8403e-07	6.04435e-10	0.604435	0.0100739	40.2957
14	300	566000	31100		727.974				7.27974e-07	2.39098e-09	2.39098	0.0398497	159.399
15	500	677000	32000		846.25				8.4625e-07	2.77945e-09	2.77945	0.0463241	185.297
16	800	738000	32400		911.111				9.11111e-07	2.99248e-09	2.99248	0.0498747	199.499
17	1200	688000	32300		852.012				8.52012e-07	2.79837e-09	2.79837	0.0466396	186.558
18	1600	713000	32100		888.474				8.88474e-07	2.91813e-09	2.91813	0.0486355	194.542
19	100	166000	26200		253.435				2.53435e-07	8.3239e-10	0.83239	0.0138732	55.4926
20	300	817000	36100		905.263				9.05263e-07	2.97327e-09	2.97327	0.0495545	198.218
21	500	988000	34700		1138.9				1.1389e-06	3.74065e-09	3.74065	0.0623442	249.377
22	800	1070000	34400		1244.19				1.24419e-06	4.08644e-09	4.08644	0.0681074	272.429
23	1200	1070000	33300		1285.29				1.28529e-06	4.22143e-09	4.22143	0.0703571	281.429
24	1600	1030000	33300		1237.24				1.23724e-06	4.06362e-09	4.06362	0.067727	270.908
25	100	82500	41500		79.5181				7.95181e-08	2.61171e-10	0.261171	0.00435286	17.4114
26	100	89100	42400		84.0566				8.40566e-08	2.76078e-10	0.276078	0.0046013	18.4052
27	300	204000	44500		183.371				1.83371e-07	6.02268e-10	0.602268	0.0100378	40.1512
28	300	222000	45300		196.026				1.96026e-07	6.43835e-10	0.643835	0.0107306	42.9223
29	500	256000	47700		214.675				2.14675e-07	7.05085e-10	0.705085	0.0117514	47.0057
30	500	278000	46500		239.14				2.3914e-07	7.85438e-10	0.785438	0.0130906	52.3625
31	800	286000	46200		247.619				2.47619e-07	8.13287e-10	0.813287	0.0135548	54.2191
32	800	315000	48200		261.411				2.61411e-07	8.58585e-10	0.858585	0.0143098	57.239
33	1200	299000	48300		247.619				2.47619e-07	8.13287e-10	0.813287	0.0135548	54.2191
34	1200	339000	51400		263.813				2.63813e-07	8.66476e-10	0.866476	0.0144413	57.7651
35	1600	326000	50600		257.708				2.57708e-07	8.46422e-10	0.846422	0.014107	56.4281
36	1600	338000	49600		272.581				2.72581e-07	8.95272e-10	0.895272	0.0149212	59.6848
37	100	122000	42500		114.824				1.14824e-07	3.7713e-10	0.37713	0.0062855	25.142
38	100	127000	41300		123.002				1.23002e-07	4.03993e-10	0.403993	0.00673321	26.9329
39	300	502000	47400		423.629				4.23629e-07	1.39138e-09	1.39138	0.0231896	92.7586
40	300	557000	48200		462.241				4.62241e-07	1.5182e-09	1.5182	0.0253033	101.213
41	500	614000	49200		499.187				4.99187e-07	1.63954e-09	1.63954	0.0273257	109.303
42	500	711000	51600		551.163				5.51163e-07	1.81026e-09	1.81026	0.0301709	120.684
43	800	715000	51100		559.687				5.59687e-07	1.83825e-09	1.83825	0.0306375	122.55
44	800	732000	47300		619.027				6.19027e-07	2.03315e-09	2.03315	0.0338859	135.543
45	1200	678000	49200		551.22				5.5122e-07	1.81044e-09	1.81044	0.030174	120.696
46	1200	736000	50600		581.818				5.81818e-07	1.91094e-09	1.91094	0.031849	127.396
47	1600	682000	50200		543.426				5.43426e-07	1.78485e-09	1.78485	0.0297474	118.99
48	1600	775000	52900		586.011				5.86011e-07	1.92471e-09	1.92471	0.0320785	128.314
49	100	156000	42600		146.479				1.46479e-07	4.81099e-10	0.481099	0.00801832	32.0733
50	100	180000	42200		170.616				1.70616e-07	5.60377e-10	0.560377	0.00933961	37.3584
51	300	810000	47600		680.672				6.80672e-07	2.23562e-09	2.23562	0.0372603	149.041
52	300	917000	48700		753.183				7.53183e-07	2.47378e-09	2.47378	0.0412296	164.918
53	500	1050000	48700		862.423				8.62423e-07	2.83257e-09	2.83257	0.0472095	188.838
54	500	1080000	48300		894.41				8.9441e-07	2.93763e-09	2.93763	0.0489604	195.842
55	800	1070000	50500		847.525				8.47525e-07	2.78364e-09	2.78364	0.0463939	185.576
56	800	1200000	49400		971.66				9.7166e-07	3.19135e-09	3.19135	0.0531891	212.757
57	1200	1110000	51700		858.801				8.58801e-07	2.82067e-09	2.82067	0.0470112	188.045
58	1200	1230000	49500		993.939				9.93939e-07	3.26452e-09	3.26452	0.0544087	217.635
59	1600	1090000	53200		819.549				8.19549e-07	2.69175e-09	2.69175	0.0448625	179.45
60	1600	1190000	51100		931.507				9.31507e-07	3.05947e-09	3.05947	0.0509911	203.965
61	100	202000	42800		188.785				1.88785e-07	6.20051e-10	0.620051	0.0103342	41.3367
62	100	236000	42800		220.561				2.20561e-07	7.24416e-10	0.724416	0.0120736	48.2944
63	300	1250000	50500		990.099				9.90099e-07	3.25191e-09	3.25191	0.0541985	216.794
64	300	1310000	48300		1084.89				1.08489e-06	3.56323e-09	3.56323	0.0593872	237.549
65	500	1400000	49700		1126.76				1.12676e-06	3.70077e-09	3.70077	0.0616794	246.718
66	500	1520000	47700		1274.63				1.27463e-06	4.18644e-09	4.18644	0.069774	279.096
67	800	1560000	49900		1250.5				1.2505e-06	4.10718e-09	4.10718	0.068453	273.812
68	800	1990000	49800		1598.39				1.59839e-06	5.24981e-09	5.24981	0.0874968	349.987
69	1200	1490000	52100		1143.95				1.14395e-06	3.75724e-09	3.75724	0.0626206	250.482
70	1200	1670000	48200		1385.89				1.38589e-06	4.55186e-09	4.55186	0.0758644	303.458
71	1600	1520000	51500		1180.58				1.18058e-06	3.87754e-09	3.87754	0.0646257	258.503
72	1600	1680000	48600		1382.72				1.38272e-06	4.54143e-09	4.54143	0.0756906	302.762

## Sheet: conversion before graphs
				wt	100	300	500	800	1200	1600
100	15.3273			15	15.3273	37.9886	48.1197	48.1879	49.5819	50.3777
300	37.9886			30	23.3792	99.6548	115.684	121.613	118.036	126.998
500	48.1197			45	40.2957	159.399	185.297	199.499	186.558	194.542
800	48.1879			60	55.4926	198.218	249.377	272.429	281.429	270.908
1200	49.5819			mut23	100	300	500	800	1200	1600
1600	50.3777			0	0	0	0	0	0	0
100	23.3792			15	17.4114	40.1512	47.0057	54.2191	54.2191	56.4281
300	99.6548			30	25.142	92.7586	109.303	122.55	120.696	118.99
500	115.684			45	32.0733	149.041	188.838	185.576	188.045	179.45
800	121.613			60	41.3367	216.794	246.718	273.812	250.482	258.503
1200	118.036			mut23	100	300	500	800	1200	1600
1600	126.998			0	0	0	0	0	0	0
100	40.2957			15	18.4052	42.9223	52.3625	57.239	57.7651	59.6848
300	159.399			30	26.9329	101.213	120.684	135.543	127.396	128.314
500	185.297			45	37.3584	164.918	195.842	212.757	217.635	203.965
800	199.499			60	48.2944	237.549	279.096	349.987	303.458	302.762
1200	186.558
1600	194.542
100	55.4926
300	198.218
500	249.377
800	272.429
1200	281.429
1600	270.908
100	17.4114
100	18.4052
300	40.1512
300	42.9223
500	47.0057
500	52.3625
800	54.2191
800	57.239
1200	54.2191
1200	57.7651
1600	56.4281
1600	59.6848
100	25.142
100	26.9329
300	92.7586
300	101.213
500	109.303
500	120.684
800	122.55
800	135.543
1200	120.696
1200	127.396
1600	118.99
1600	128.314
100	32.0733
100	37.3584
300	149.041
300	164.918
500	188.838
500	195.842
800	185.576
800	212.757
1200	188.045
1200	217.635
1600	179.45
1600	203.965
100	41.3367
100	48.2944
300	216.794
300	237.549
500	246.718
500	279.096
800	273.812
800	349.987
1200	250.482
1200	303.458
1600	258.503
1600	302.762

## Sheet: WT
wt	100	300	500	800	1200	1600
0	0	0	0	0	0	0
15	15.3273	37.9886	48.1197	48.1879	49.5819	50.3777
30	23.3792	99.6548	115.684	121.613	118.036	126.998
45	40.2957	159.399	185.297	199.499	186.558	194.542
60	55.4926	198.218	249.377	272.429	281.429	270.908
concentration	slope
0	0
100	0.9064
300	3.452
500	4.2395
800	4.6411
1200	4.66
1600	4.5372

## Sheet: Mut23Y96F_1
mut23	100	300	500	800	1200	1600
0	0	0	0	0	0	0
15	17.4114	40.1512	47.0057	54.2191	54.2191	56.4281
30	25.142	92.7586	109.303	122.55	120.696	118.99
45	32.0733	149.041	188.838	185.576	188.045	179.45
60	41.3367	216.794	246.718	273.812	250.482	258.503
concentration	slope
0	0
100	0.6489
300	3.6165
500	4.2351
800	4.5265
1200	4.2319
1600	4.2668

## Sheet: Mut23Y96F_2
mut23	100	300	500	800	1200	1600
0	0	0	0	0	0	0
15	18.4052	42.9223	52.3625	57.239	57.7651	59.6848
30	26.9329	101.213	120.684	135.543	127.396	128.314
45	37.3584	164.918	195.842	212.757	217.635	203.965
60	48.2944	237.549	279.096		303.458	302.762
				349.987
concentration	slope
0	0
100	0.7703
300	3.9806
500	4.6778
800	4.7772
1200	5.1119
1600	4.9987
