# Supplementary material for: Structural basis of phosphatidylcholine recognition by the C2–domain of cytosolic phospholipase A2α
Source: eLife journal article supplement (doi:10.7554/elife.44760), 2019-05-03
Supplement: supp [file 2018-03-13_kinetics KsA wt and mut 23 3mm Tx PAPC_02.xlsx]

## Sheet: Raw Data
	Sample Name		AA	AA d8
1	1		72500	37800
2	2		138000	41700
3	3		201000	43800
4	4		218000	43700
5	5		225000	42600
6	6		238000	45700
7	7		127000	40800
8	8		378000	43800
9	9		520000	47300
10	10		565000	48100
11	11		555000	47500
12	12		580000	48300
13	13		181000	41300
14	14		656000	46100
15	15		843000	48800
16	16		903000	48000
17	17		904000	48200
18	18		954000	49400
19	19		233000	46000
20	20		942000	49500
21	21		1240000	48700
22	22		1260000	49100
23	23		1260000	48400
24	24		1360000	52600
25	25		94700	42100
26	26		104000	42200
27	27		195000	43600
28	28		216000	42300
29	29		272000	45500
30	30		303000	45700
31	31		301000	47600
32	32		339000	46800
33	33		340000	47600
34	34		372000	46500
35	35		333000	48000
36	36		351000	47300
37	37		141000	42300
38	38		159000	42400
39	39		517000	48000
40	40		571000	48600
41	41		676000	49400
42	42		758000	50000
43	43		775000	51100
44	44		818000	48700
45	45		747000	46100
46	46		864000	51600
47	47		764000	49700
48	48		816000	50700
49	49		178000	42700
50	50		208000	46700
51	51		868000	53800
52	52		960000	56200
53	53		1060000	51400
54	54		1200000	47900
55	55		1220000	51200
56	56		1300000	51100
57	57		1180000	47800
58	58		1240000	48700
59	59		1230000	51200
60	60		1330000	50800
61	61		235000	45100
62	62		261000	44200
63	63		1220000	59000
64	64		1320000	59700
65	65		1520000	52200
66	66		1680000	54400
67	67		1700000	52400
68	68		1780000	48500
69	69		1670000	50900
70	70		1820000	51400
71	71		1610000	49200
72	72		1850000	52400

## Sheet: AA
	Sample Name	AA	AA d8		ng AA				gram of AA	mol AA	nmol AA	nmol AA/min	nmol AA/min/mg cpla2					19	N65D
1	100	72500	37800		76.7196				7.67196e-08	2.5198e-10	0.25198	0.00419967	16.7987					20	A94Y
2	300	138000	41700		132.374				1.32374e-07	4.34773e-10	0.434773	0.00724622	28.9849					21	A94F
3	500	201000	43800		183.562				1.83562e-07	6.02895e-10	0.602895	0.0100483	40.193					22	Y96A
4	800	218000	43700		199.542				1.99542e-07	6.55383e-10	0.655383	0.010923	43.6922
5	1200	225000	42600		211.268				2.11268e-07	6.93894e-10	0.693894	0.0115649	46.2596
6	1600	238000	45700		208.315				2.08315e-07	6.84196e-10	0.684196	0.0114033	45.6131
7	100	127000	40800		124.51				1.2451e-07	4.08944e-10	0.408944	0.00681573	27.2629
8	300	378000	43800		345.205				3.45205e-07	1.1338e-09	1.1338	0.0188967	75.5869
9	500	520000	47300		439.746				4.39746e-07	1.44432e-09	1.44432	0.0240719	96.2877
10	800	565000	48100		469.854				4.69854e-07	1.5432e-09	1.5432	0.0257201	102.88
11	1200	555000	47500		467.368				4.67368e-07	1.53504e-09	1.53504	0.025584	102.336
12	1600	580000	48300		480.331				4.80331e-07	1.57761e-09	1.57761	0.0262936	105.174
13	100	181000	41300		175.303				1.75303e-07	5.75769e-10	0.575769	0.00959615	38.3846
14	300	656000	46100		569.197				5.69197e-07	1.86949e-09	1.86949	0.0311581	124.633
15	500	843000	48800		690.984				6.90984e-07	2.26949e-09	2.26949	0.0378248	151.299
16	800	903000	48000		752.5				7.525e-07	2.47153e-09	2.47153	0.0411922	164.769
17	1200	904000	48200		750.207				7.50207e-07	2.464e-09	2.464	0.0410667	164.267
18	1600	954000	49400		772.47				7.7247e-07	2.53712e-09	2.53712	0.0422854	169.141
19	100	233000	46000		202.609				2.02609e-07	6.65454e-10	0.665454	0.0110909	44.3636
20	300	942000	49500		761.212				7.61212e-07	2.50015e-09	2.50015	0.0416691	166.676
21	500	1240000	48700		1018.48				1.01848e-06	3.34513e-09	3.34513	0.0557521	223.008
22	800	1260000	49100		1026.48				1.02648e-06	3.37139e-09	3.37139	0.0561898	224.759
23	1200	1260000	48400		1041.32				1.04132e-06	3.42015e-09	3.42015	0.0570025	228.01
24	1600	1360000	52600		1034.22				1.03422e-06	3.39682e-09	3.39682	0.0566137	226.455
25	100	94700	42100		89.9762				8.99762e-08	2.95521e-10	0.295521	0.00492534	19.7014
26	100	104000	42200		98.5782				9.85782e-08	3.23773e-10	0.323773	0.00539622	21.5849
27	300	195000	43600		178.899				1.78899e-07	5.87581e-10	0.587581	0.00979302	39.1721
28	300	216000	42300		204.255				2.04255e-07	6.70862e-10	0.670862	0.011181	44.7241
29	500	272000	45500		239.121				2.39121e-07	7.85376e-10	0.785376	0.0130896	52.3584
30	500	303000	45700		265.208				2.65208e-07	8.71057e-10	0.871057	0.0145176	58.0704
31	800	301000	47600		252.941				2.52941e-07	8.30767e-10	0.830767	0.0138461	55.3845
32	800	339000	46800		289.744				2.89744e-07	9.51642e-10	0.951642	0.0158607	63.4428
33	1200	340000	47600		285.714				2.85714e-07	9.38408e-10	0.938408	0.0156401	62.5606
34	1200	372000	46500		320				3.2e-07	1.05102e-09	1.05102	0.017517	70.0678
35	1600	333000	48000		277.5				2.775e-07	9.11429e-10	0.911429	0.0151905	60.7619
36	1600	351000	47300		296.829				2.96829e-07	9.74913e-10	0.974913	0.0162486	64.9942
37	100	141000	42300		133.333				1.33333e-07	4.37924e-10	0.437924	0.00729873	29.1949
38	100	159000	42400		150				1.5e-07	4.92664e-10	0.492664	0.00821107	32.8443
39	300	517000	48000		430.833				4.30833e-07	1.41504e-09	1.41504	0.023584	94.3361
40	300	571000	48600		469.959				4.69959e-07	1.54355e-09	1.54355	0.0257258	102.903
41	500	676000	49400		547.368				5.47368e-07	1.79779e-09	1.79779	0.0299632	119.853
42	500	758000	50000		606.4				6.064e-07	1.99168e-09	1.99168	0.0331946	132.779
43	800	775000	51100		606.654				6.06654e-07	1.99251e-09	1.99251	0.0332085	132.834
44	800	818000	48700		671.869				6.71869e-07	2.2067e-09	2.2067	0.0367784	147.114
45	1200	747000	46100		648.156				6.48156e-07	2.12882e-09	2.12882	0.0354804	141.922
46	1200	864000	51600		669.767				6.69767e-07	2.1998e-09	2.1998	0.0366634	146.654
47	1600	764000	49700		614.889				6.14889e-07	2.01956e-09	2.01956	0.0336593	134.637
48	1600	816000	50700		643.787				6.43787e-07	2.11447e-09	2.11447	0.0352412	140.965
49	100	178000	42700		166.745				1.66745e-07	5.47661e-10	0.547661	0.00912769	36.5108
50	100	208000	46700		178.158				1.78158e-07	5.85149e-10	0.585149	0.00975248	39.0099
51	300	868000	53800		645.353				6.45353e-07	2.11962e-09	2.11962	0.0353269	141.308
52	300	960000	56200		683.274				6.83274e-07	2.24417e-09	2.24417	0.0374028	149.611
53	500	1060000	51400		824.903				8.24903e-07	2.70933e-09	2.70933	0.0451556	180.622
54	500	1200000	47900		1002.09				1.00209e-06	3.29129e-09	3.29129	0.0548548	219.419
55	800	1220000	51200		953.125				9.53125e-07	3.13047e-09	3.13047	0.0521745	208.698
56	800	1300000	51100		1017.61				1.01761e-06	3.34228e-09	3.34228	0.0557046	222.818
57	1200	1180000	47800		987.448				9.87448e-07	3.2432e-09	3.2432	0.0540534	216.213
58	1200	1240000	48700		1018.48				1.01848e-06	3.34513e-09	3.34513	0.0557521	223.008
59	1600	1230000	51200		960.938				9.60938e-07	3.15613e-09	3.15613	0.0526022	210.409
60	1600	1330000	50800		1047.24				1.04724e-06	3.4396e-09	3.4396	0.0573267	229.307
61	100	235000	45100		208.426				2.08426e-07	6.8456e-10	0.68456	0.0114093	45.6373
62	100	261000	44200		236.199				2.36199e-07	7.75779e-10	0.775779	0.0129297	51.7186
63	300	1220000	59000		827.119				8.27119e-07	2.71661e-09	2.71661	0.0452769	181.108
64	300	1320000	59700		884.422				8.84422e-07	2.90482e-09	2.90482	0.0484137	193.655
65	500	1520000	52200		1164.75				1.16475e-06	3.82554e-09	3.82554	0.063759	255.036
66	500	1680000	54400		1235.29				1.23529e-06	4.05724e-09	4.05724	0.0676206	270.482
67	800	1700000	52400		1297.71				1.29771e-06	4.26224e-09	4.26224	0.0710373	284.149
68	800	1780000	48500		1468.04				1.46804e-06	4.82168e-09	4.82168	0.0803613	321.445
69	1200	1670000	50900		1312.38				1.31238e-06	4.31041e-09	4.31041	0.0718402	287.361
70	1200	1820000	51400		1416.34				1.41634e-06	4.65188e-09	4.65188	0.0775313	310.125
71	1600	1610000	49200		1308.94				1.30894e-06	4.29913e-09	4.29913	0.0716522	286.609
72	1600	1850000	52400		1412.21				1.41221e-06	4.63832e-09	4.63832	0.0773053	309.221

## Sheet: conversion before graphs
				wt	100	300	500	800	1200	1600
100	16.7987			15	16.7987	28.9849	40.193	43.6922	46.2596	45.6131
300	28.9849			30	27.2629	75.5869	96.2877	102.88	102.336	105.174
500	40.193			45	38.3846	124.633	151.299	164.769	164.267	169.141
800	43.6922			60	44.3636	166.676	223.008	224.759	228.01	226.455
1200	46.2596			mut23	100	300	500	800	1200	1600
1600	45.6131			0	0	0	0	0	0	0
100	27.2629			15	19.7014	39.1721	52.3584	55.3845	62.5606	60.7619
300	75.5869			30	29.1949	94.3361	119.853	132.834	141.922	134.637
500	96.2877			45	36.5108	141.308	180.622	208.698	216.213	210.409
800	102.88			60	45.6373	181.108	255.036	284.149	287.361	286.609
1200	102.336			mut23	100	300	500	800	1200	1600
1600	105.174			0	0	0	0	0	0	0
100	38.3846			15	21.5849	44.7241	58.0704	63.4428	70.0678	64.9942
300	124.633			30	32.8443	102.903	132.779	147.114	146.654	140.965
500	151.299			45	39.0099	149.611	219.419	222.818	223.008	229.307
800	164.769			60	51.7186	193.655	270.482	321.445	310.125	309.221
1200	164.267
1600	169.141
100	44.3636
300	166.676
500	223.008
800	224.759
1200	228.01
1600	226.455
100	19.7014
100	21.5849
300	39.1721
300	44.7241
500	52.3584
500	58.0704
800	55.3845
800	63.4428
1200	62.5606
1200	70.0678
1600	60.7619
1600	64.9942
100	29.1949
100	32.8443
300	94.3361
300	102.903
500	119.853
500	132.779
800	132.834
800	147.114
1200	141.922
1200	146.654
1600	134.637
1600	140.965
100	36.5108
100	39.0099
300	141.308
300	149.611
500	180.622
500	219.419
800	208.698
800	222.818
1200	216.213
1200	223.008
1600	210.409
1600	229.307
100	45.6373
100	51.7186
300	181.108
300	193.655
500	255.036
500	270.482
800	284.149
800	321.445
1200	287.361
1200	310.125
1600	286.609
1600	309.221

## Sheet: WT
wt	100	300	500	800	1200	1600
0	0	0	0	0	0	0
15	16.7987	28.9849	40.193	43.6922	46.2596	45.6131
30	27.2629	75.5869	96.2877	102.88	102.336	105.174
45	38.3846	124.633	151.299	164.769	164.267	169.141
60	44.3636	166.676	223.008	224.759	228.01	226.455
concentration	slope
0	0
100	0.7354
300	2.86
500	3.7142
800	3.804
1200	3.8268
1600	3.8429

## Sheet: Mut23Y96F_1
mut23	100	300	500	800	1200	1600
0	0	0	0	0	0	0
15	19.7014	39.1721	52.3584	55.3845	62.5606	60.7619
30	29.1949	94.3361	119.853	132.834	141.922	134.637
45	36.5108	141.308	180.622	208.698	216.213	210.409
60	45.6373	181.108	255.036	284.149	287.361	286.609
concentration	slope
0	0
100	0.7206
300	3.0957
500	4.2556
800	4.8107
1200	4.8558
1600	4.8191

## Sheet: Mut23Y96F_2
mut23	100	300	500	800	1200	1600
0	0	0	0	0	0	0
15	21.5849	44.7241	58.0704	63.4428	70.0678	64.9942
30	32.8443	102.903	132.779	147.114	146.654	140.965
45	39.0099	149.611	219.419	222.818	223.008	229.307
60	51.7186	193.655	270.482	321.445	310.125	309.221
concentration	slope
0	0
100	0.8057
300	3.2813
500	4.6821
800	5.3484
1200	5.1546
1600	5.2184
