# Supplementary material for: Structural basis of phosphatidylcholine recognition by the C2–domain of cytosolic phospholipase A2α
Source: eLife journal article supplement (doi:10.7554/elife.44760), 2019-05-03
Supplement: supp [file 2018-08-01_kinetics 250ng WT and mut22 Y96A PAPC 2mM Tx100 KmB, 10 Concentrations.xlsx]

## Sheet: Raw Data
	Sample Name		AA	AA d8
1	1		13300	76700
2	2		49800	77200
3	3		109000	81000
4	4		162000	83600
5	5		328000	84200
6	6		489000	92200
7	7		536000	88800
8	8		629000	87900
9	9		786000	94600
10	10		828000	102000
11	11		26700	70100
12	12		99800	79400
13	13		235000	83900
14	14		403000	86300
15	15		784000	92400
16	16		1120000	93800
17	17		1230000	94600
18	18		1410000	99100
19	19		1680000	95500
20	20		1880000	103000
21	21		41800	77300
22	22		176000	74000
23	23		366000	79500
24	24		618000	88000
25	25		1260000	88000
26	26		1730000	98200
27	27		1960000	93700
28	28		2200000	101000
29	29		2550000	98300
30	30		2880000	109000
31	31		58200	73700
32	32		236000	80100
33	33		537000	81800
34	34		879000	87500
35	35		1780000	88100
36	36		2370000	91400
37	37		2380000	91700
38	38		3120000	94400
39	39		3700000	108000
40	40		3810000	113000
41	41		4970	75400
42	42		21800	79400
43	43		43900	80100
44	44		68900	80100
45	45		179000	85600
46	46		239000	89400
47	47		276000	82200
48	48		377000	94100
49	49		451000	101000
50	50		400000	91800
51	51		8660	75100
52	52		38500	62700
53	53		84200	76100
54	54		146000	78100
55	55		452000	88500
56	56		600000	92800
57	57		617000	87800
58	58		815000	99400
59	59		1030000	109000
60	60		963000	106000
61	61		12400	70600
62	62		63300	69100
63	63		132000	77000
64	64		240000	84600
65	65		679000	88800
66	66		955000	89600
67	67		904000	81500
68	68		1280000	95300
69	69		1620000	120000
70	70		1480000	99800
71	71		16000	73900
72	72		88200	71900
73	73		194000	78700
74	74		363000	84300
75	75		983000	93900
76	76		1320000	85500
77	77		1440000	92500
78	78		1790000	88400
79	79		2300000	118000
80	80		2140000	110000
81	Experimental Blank		845	70300
82	PAPC Blank		8530	88000
83	WT Blank		610	69300
84	Mut 22 Blank		990	72700

## Sheet: AA
	Sample Name	AA	AA d8		ng AA		avg		gram of AA	mol AA	nmol AA	nmol AA/min	nmol AA/min/mg cpla2					19	N65D
1	50	13300	76700		6.93611				6.93611e-09	2.27812e-11	0.0227812	0.000379686	1.51875					20	A94Y
2	100	49800	77200		25.8031				2.58031e-08	8.47485e-11	0.0847485	0.00141247	5.6499					21	A94F
3	150	109000	81000		53.8272				5.38272e-08	1.76792e-10	0.176792	0.00294653	11.7861					22	Y96A
4	200	162000	83600		77.512				7.7512e-08	2.54583e-10	0.254583	0.00424304	16.9722
5	300	328000	84200		155.819				1.55819e-07	5.11778e-10	0.511778	0.00852963	34.1185
6	400	489000	92200		212.148				2.12148e-07	6.96783e-10	0.696783	0.0116131	46.4522
7	500	536000	88800		241.441				2.41441e-07	7.92997e-10	0.792997	0.0132166	52.8665
8	800	629000	87900		286.234				2.86234e-07	9.40117e-10	0.940117	0.0156686	62.6744
9	1200	786000	94600		332.347				3.32347e-07	1.09157e-09	1.09157	0.0181928	72.7713
10	1600	828000	102000		324.706				3.24706e-07	1.06647e-09	1.06647	0.0177746	71.0982
11	50	26700	70100		15.2354				1.52354e-08	5.00395e-11	0.0500395	0.000833992	3.33597
12	100	99800	79400		50.2771				5.02771e-08	1.65132e-10	0.165132	0.00275219	11.0088
13	150	235000	83900		112.038				1.12038e-07	3.67981e-10	0.367981	0.00613302	24.5321
14	200	403000	86300		186.79				1.8679e-07	6.13499e-10	0.613499	0.010225	40.9
15	300	784000	92400		339.394				3.39394e-07	1.11472e-09	1.11472	0.0185786	74.3144
16	400	1120000	93800		477.612				4.77612e-07	1.56868e-09	1.56868	0.0261447	104.579
17	500	1230000	94600		520.085				5.20085e-07	1.70818e-09	1.70818	0.0284697	113.879
18	800	1410000	99100		569.122				5.69122e-07	1.86924e-09	1.86924	0.031154	124.616
19	1200	1680000	95500		703.665				7.03665e-07	2.31114e-09	2.31114	0.038519	154.076
20	1600	1880000	103000		730.097				7.30097e-07	2.39795e-09	2.39795	0.0399659	159.863
21	50	41800	77300		21.63				2.163e-08	7.10422e-11	0.0710422	0.00118404	4.73615
22	100	176000	74000		95.1351				9.51351e-08	3.12465e-10	0.312465	0.00520774	20.831
23	150	366000	79500		184.151				1.84151e-07	6.04831e-10	0.604831	0.0100805	40.322
24	200	618000	88000		280.909				2.80909e-07	9.22626e-10	0.922626	0.0153771	61.5084
25	300	1260000	88000		572.727				5.72727e-07	1.88108e-09	1.88108	0.0313514	125.405
26	400	1730000	98200		704.684				7.04684e-07	2.31449e-09	2.31449	0.0385748	154.299
27	500	1960000	93700		836.713				8.36713e-07	2.74812e-09	2.74812	0.0458021	183.208
28	800	2200000	101000		871.287				8.71287e-07	2.86168e-09	2.86168	0.0476947	190.779
29	1200	2550000	98300		1037.64				1.03764e-06	3.40805e-09	3.40805	0.0568009	227.204
30	1600	2880000	109000		1056.88				1.05688e-06	3.47125e-09	3.47125	0.0578542	231.417
31	50	58200	73700		31.5875				3.15875e-08	1.03747e-10	0.103747	0.00172912	6.91646
32	100	236000	80100		117.853				1.17853e-07	3.87079e-10	0.387079	0.00645131	25.8053
33	150	537000	81800		262.592				2.62592e-07	8.62464e-10	0.862464	0.0143744	57.4976
34	200	879000	87500		401.829				4.01829e-07	1.31978e-09	1.31978	0.0219963	87.9852
35	300	1780000	88100		808.173				8.08173e-07	2.65439e-09	2.65439	0.0442398	176.959
36	400	2370000	91400		1037.2				1.0372e-06	3.40661e-09	3.40661	0.0567768	227.107
37	500	2380000	91700		1038.17				1.03817e-06	3.40979e-09	3.40979	0.0568298	227.319
38	800	3120000	94400		1322.03				1.32203e-06	4.34213e-09	4.34213	0.0723688	289.475
39	1200	3700000	108000		1370.37				1.37037e-06	4.50088e-09	4.50088	0.0750147	300.059
40	1600	3810000	113000		1348.67				1.34867e-06	4.42962e-09	4.42962	0.073827	295.308
41	50	4970	75400		2.6366				2.6366e-09	8.65974e-12	0.00865974	0.000144329	0.577316
42	100	21800	79400		10.9824				1.09824e-08	3.60708e-11	0.0360708	0.00060118	2.40472
43	150	43900	80100		21.9226				2.19226e-08	7.20032e-11	0.0720032	0.00120005	4.80021
44	200	68900	80100		34.407				3.4407e-08	1.13007e-10	0.113007	0.00188346	7.53382
45	300	179000	85600		83.6449				8.36449e-08	2.74726e-10	0.274726	0.00457876	18.315
46	400	239000	89400		106.935				1.06935e-07	3.51221e-10	0.351221	0.00585368	23.4147
47	500	276000	82200		134.307				1.34307e-07	4.4112e-10	0.44112	0.00735201	29.408
48	800	377000	94100		160.255				1.60255e-07	5.26346e-10	0.526346	0.00877244	35.0898
49	1200	451000	101000		178.614				1.78614e-07	5.86645e-10	0.586645	0.00977741	39.1096
50	1600	400000	91800		174.292				1.74292e-07	5.7245e-10	0.57245	0.00954083	38.1633
51	50	8660	75100		4.61252				4.61252e-09	1.51495e-11	0.0151495	0.000252491	1.00997
52	100	38500	62700		24.5614				2.45614e-08	8.06702e-11	0.0806702	0.0013445	5.37801
53	150	84200	76100		44.2576				4.42576e-08	1.45361e-10	0.145361	0.00242268	9.69072
54	200	146000	78100		74.7759				7.47759e-08	2.45596e-10	0.245596	0.00409327	16.3731
55	300	452000	88500		204.294				2.04294e-07	6.70988e-10	0.670988	0.0111831	44.7326
56	400	600000	92800		258.621				2.58621e-07	8.49421e-10	0.849421	0.014157	56.6281
57	500	617000	87800		281.093				2.81093e-07	9.23231e-10	0.923231	0.0153872	61.5488
58	800	815000	99400		327.968				3.27968e-07	1.07719e-09	1.07719	0.0179531	71.8125
59	1200	1030000	109000		377.982				3.77982e-07	1.24145e-09	1.24145	0.0206909	82.7636
60	1600	963000	106000		363.396				3.63396e-07	1.19355e-09	1.19355	0.0198925	79.5699
61	50	12400	70600		7.0255				7.0255e-09	2.30747e-11	0.0230747	0.000384579	1.53832
62	100	63300	69100		36.6425				3.66425e-08	1.2035e-10	0.12035	0.00200583	8.02332
63	150	132000	77000		68.5714				6.85714e-08	2.25218e-10	0.225218	0.00375363	15.0145
64	200	240000	84600		113.475				1.13475e-07	3.72701e-10	0.372701	0.00621169	24.8467
64	300	679000	88800		305.856				3.05856e-07	1.00456e-09	1.00456	0.0167427	66.9708
64	400	955000	89600		426.339				4.26339e-07	1.40028e-09	1.40028	0.023338	93.3521
64	500	904000	81500		443.681				4.43681e-07	1.45724e-09	1.45724	0.0242873	97.1493
64	800	1280000	95300		537.251				5.37251e-07	1.76456e-09	1.76456	0.0294094	117.637
64	1200	1620000	120000		540				5.4e-07	1.77359e-09	1.77359	0.0295599	118.239
64	1600	1480000	99800		593.186				5.93186e-07	1.94828e-09	1.94828	0.0324713	129.885
64	50	16000	73900		8.66035				8.66035e-09	2.84443e-11	0.0284443	0.000474072	1.89629
64	100	88200	71900		49.0682				4.90682e-08	1.61161e-10	0.161161	0.00268601	10.7441
64	150	194000	78700		98.6023				9.86023e-08	3.23852e-10	0.323852	0.00539754	21.5901
64	200	363000	84300		172.242				1.72242e-07	5.65717e-10	0.565717	0.00942861	37.7144
64	300	983000	93900		418.743				4.18743e-07	1.37533e-09	1.37533	0.0229222	91.6889
64	400	1320000	85500		617.544				6.17544e-07	2.02828e-09	2.02828	0.0338047	135.219
64	500	1440000	92500		622.703				6.22703e-07	2.04522e-09	2.04522	0.034087	136.348
64	800	1790000	88400		809.955				8.09955e-07	2.66024e-09	2.66024	0.0443373	177.349
64	1200	2300000	118000		779.661				7.79661e-07	2.56074e-09	2.56074	0.042679	170.716
64	1600	2140000	110000		778.182				7.78182e-07	2.55588e-09	2.55588	0.0425981	170.392

## Sheet: conversion before graphs
50	1.51875			wt	50	100	150	200	300	400	500	800	1200	1600
100	5.6499			15	1.51875	5.6499	11.7861	16.9722	34.1185	46.4522	52.8665	62.6744	72.7713	71.0982
150	11.7861			30	3.33597	11.0088	24.5321	40.9	74.3144	104.579	113.879	124.616	154.076	159.863
200	16.9722			45	4.73615	20.831	40.322	61.5084	125.405	154.299	183.208	190.779	227.204	231.417
300	34.1185			60	6.91646	25.8053	57.4976	87.9852	176.959	227.107	227.319	289.475	300.059	295.308
400	46.4522			mut22	50	100	150	200	300	400	500	800	1200	1600
500	52.8665			15	0.577316	2.40472	4.80021	7.53382	18.315	23.4147	29.408	35.0898	39.1096	38.1633
800	62.6744			30	1.00997	5.37801	9.69072	16.3731	44.7326	56.6281	61.5488	71.8125	82.7636	79.5699
1200	72.7713			45	1.53832	8.02332	15.0145	24.8467	66.9708	93.3521	97.1493	117.637	118.239	129.885
1600	71.0982			60	1.89629	10.7441	21.5901	37.7144	91.6889	135.219	136.348	177.349	170.716	170.392
50	3.33597
100	11.0088
150	24.5321
200	40.9
300	74.3144
400	104.579
500	113.879
800	124.616
1200	154.076
1600	159.863
50	4.73615
100	20.831
150	40.322
200	61.5084
300	125.405
400	154.299
500	183.208
800	190.779
1200	227.204
1600	231.417
50	6.91646
100	25.8053
150	57.4976
200	87.9852
300	176.959
400	227.107
500	227.319
800	289.475
1200	300.059
1600	295.308
50	0.577316
100	2.40472
150	4.80021
200	7.53382
300	18.315
400	23.4147
500	29.408
800	35.0898
1200	39.1096
1600	38.1633
50	1.00997
100	5.37801
150	9.69072
200	16.3731
300	44.7326
400	56.6281
500	61.5488
800	71.8125
1200	82.7636
1600	79.5699
50	1.53832
100	8.02332
150	15.0145
200	24.8467
300	66.9708
400	93.3521
500	97.1493
800	117.637
1200	118.239
1600	129.885
50	1.89629
100	10.7441
150	21.5901
200	37.7144
300	91.6889
400	135.219
500	136.348
800	177.349
1200	170.716
1600	170.392

## Sheet: PAPC WT 6-21A
wt	50	100	150	200	300	400	500	800	1200	1600
0	0	0	0	0	0	0	0	0	0	0
15	1.51875	5.6499	11.7861	16.9722	34.1185	46.4522	52.8665	62.6744	72.7713	71.0982
30	3.33597	11.0088	24.5321	40.9	74.3144	104.579	113.879	124.616	154.076	159.863
45	4.73615	20.831	40.322	61.5084	125.405	154.299	183.208	190.779	227.204	231.417
60	6.91646	25.8053	57.4976	87.9852	176.959	227.107	227.319	289.475	300.059	295.308
concentration	slope
0	0
50	0.1137
100	0.4453
150	0.9569
200	1.47
300	2.968
400	3.7471
500	3.8999
800	4.7137
1200	5.0303
1600	5.0062

## Sheet: PAPC Mut22 
mut22	50	100	150	200	300	400	500	800	1200	1600
0	0	0	0	0	0	0	0	0	0	0
15	0.577316	2.40472	4.80021	7.53382	18.315	23.4147	29.408	35.0898	39.1096	38.1633
30	1.00997	5.37801	9.69072	16.3731	44.7326	56.6281	61.5488	71.8125	82.7636	79.5699
45	1.53832	8.02332	15.0145	24.8467	66.9708	93.3521	97.1493	117.637	118.239	129.885
60	1.89629	10.7441	21.5901	37.7144	91.6889	135.219	136.348	177.349	170.716	170.392
concentration	slope
0	0
50	0.0317
100	0.1807
150	0.356
200	0.6813
300	1.5469
400	2.2692
500	2.2696
800	2.915
1200	2.8037
1600	2.8834
