# Supplementary material for: Structural basis of phosphatidylcholine recognition by the C2–domain of cytosolic phospholipase A2α
Source: eLife journal article supplement (doi:10.7554/elife.44760), 2019-05-03
Supplement: supp [file 2018-08-03_kinetics 250ng WT and mut19 N65D PAPC 2mM Tx100 KmB, 10 Concentrations.xlsx]

## Sheet: Raw Data
	Sample Name		AA	AA d8
1	1		6650	69200
2	2		24700	80700
3	3		45000	74000
4	4		80800	78400
5	5		217000	83600
6	6		363000	86600
7	7		399000	84200
8	8		520000	91500
9	9		585000	92500
10	10		633000	98300
11	11		16200	79100
12	12		50500	81300
13	13		108000	82100
14	14		187000	84300
15	15		571000	84800
16	16		873000	88200
17	17		929000	93100
18	18		1110000	92200
19	19		1310000	102000
20	20		1520000	115000
21	21		23600	79700
22	22		78500	75500
23	23		171000	83400
24	24		284000	81400
25	25		1020000	98500
26	26		1260000	91100
27	27		1500000	102000
28	28		1830000	97100
29	29		1910000	92100
30	30		2280000	117000
31	31		30800	81600
32	32		102000	78500
33	33		220000	82800
34	34		399000	88400
35	35		1380000	97400
36	36		1770000	94900
37	37		1970000	98300
38	38		2460000	102000
39	39		2690000	93000
40	40		2800000	113000
41	41		6610	77000
42	42		15500	78400
43	43		26900	76500
44	44		42900	76900
45	45		108000	83000
46	46		162000	79900
47	47		177000	82900
48	48		205000	86000
49	49		232000	86800
50	50		253000	95300
51	51		12300	73100
52	52		30700	75800
53	53		50900	75700
54	54		76000	73500
55	55		231000	87500
56	56		365000	84200
57	57		395000	91500
58	58		455000	92600
59	59		541000	89200
60	60		582000	101000
61	61		16600	77000
62	62		41200	80400
63	63		76500	77400
64	64		124000	84400
65	65		335000	88000
66	66		582000	89100
67	67		592000	83100
68	68		683000	92900
69	69		807000	91200
70	70		935000	99100
71	71		25700	72900
72	72		56200	73800
73	73		107000	80200
74	74		185000	84200
75	75		533000	97200
76	76		850000	85200
77	77		829000	91100
78	78		949000	94200
79	79		1260000	99700
80	80		1210000	102000

## Sheet: AA
	Sample Name	AA	AA d8		ng AA		avg		gram of AA	mol AA	nmol AA	nmol AA/min	nmol AA/min/mg cpla2					19	N65D
1	50	6650	69200		3.84393				3.84393e-09	1.26251e-11	0.0126251	0.000210419	0.841675					20	A94Y
2	100	24700	80700		12.2429				1.22429e-08	4.02109e-11	0.0402109	0.000670181	2.68072					21	A94F
3	150	45000	74000		24.3243				2.43243e-08	7.98915e-11	0.0798915	0.00133153	5.3261					22	Y96A
4	200	80800	78400		41.2245				4.12245e-08	1.35399e-10	0.135399	0.00225665	9.02659
5	300	217000	83600		103.828				1.03828e-07	3.41015e-10	0.341015	0.00568358	22.7343
6	400	363000	86600		167.667				1.67667e-07	5.50692e-10	0.550692	0.0091782	36.7128
7	500	399000	84200		189.549				1.89549e-07	6.22559e-10	0.622559	0.010376	41.504
8	800	520000	91500		227.322				2.27322e-07	7.46624e-10	0.746624	0.0124437	49.775
9	1200	585000	92500		252.973				2.52973e-07	8.30872e-10	0.830872	0.0138479	55.3915
10	1600	633000	98300		257.579				2.57579e-07	8.45999e-10	0.845999	0.0141	56.4
11	50	16200	79100		8.19216				8.19216e-09	2.69066e-11	0.0269066	0.000448443	1.79377
12	100	50500	81300		24.8462				2.48462e-08	8.16057e-11	0.0816057	0.0013601	5.44038
13	150	108000	82100		52.6188				5.26188e-08	1.72823e-10	0.172823	0.00288038	11.5215
14	200	187000	84300		88.7307				8.87307e-08	2.9143e-10	0.29143	0.00485716	19.4287
15	300	571000	84800		269.34				2.6934e-07	8.84627e-10	0.884627	0.0147438	58.9751
16	400	873000	88200		395.918				3.95918e-07	1.30037e-09	1.30037	0.0216728	86.6911
17	500	929000	93100		399.141				3.99141e-07	1.31095e-09	1.31095	0.0218492	87.3966
18	800	1110000	92200		481.562				4.81562e-07	1.58166e-09	1.58166	0.0263609	105.444
19	1200	1310000	102000		513.725				5.13725e-07	1.6873e-09	1.6873	0.0281216	112.486
20	1600	1520000	115000		528.696				5.28696e-07	1.73646e-09	1.73646	0.0289411	115.764
21	50	23600	79700		11.8444				1.18444e-08	3.89021e-11	0.0389021	0.000648369	2.59348
22	100	78500	75500		41.5894				4.15894e-08	1.36597e-10	0.136597	0.00227662	9.1065
23	150	171000	83400		82.0144				8.20144e-08	2.6937e-10	0.26937	0.00448951	17.958
24	200	284000	81400		139.558				1.39558e-07	4.58368e-10	0.458368	0.00763946	30.5578
25	300	1020000	98500		414.213				4.14213e-07	1.36045e-09	1.36045	0.0226742	90.6969
26	400	1260000	91100		553.238				5.53238e-07	1.81707e-09	1.81707	0.0302845	121.138
27	500	1500000	102000		588.235				5.88235e-07	1.93202e-09	1.93202	0.0322003	128.801
28	800	1830000	97100		753.862				7.53862e-07	2.47601e-09	2.47601	0.0412668	165.067
29	1200	1910000	92100		829.533				8.29533e-07	2.72454e-09	2.72454	0.045409	181.636
30	1600	2280000	117000		779.487				7.79487e-07	2.56017e-09	2.56017	0.0426695	170.678
31	50	30800	81600		15.098				1.5098e-08	4.95884e-11	0.0495884	0.000826474	3.3059
32	100	102000	78500		51.9745				5.19745e-08	1.70707e-10	0.170707	0.00284511	11.3804
33	150	220000	82800		106.28				1.0628e-07	3.4907e-10	0.34907	0.00581783	23.2713
34	200	399000	88400		180.543				1.80543e-07	5.92981e-10	0.592981	0.00988301	39.532
35	300	1380000	97400		566.735				5.66735e-07	1.8614e-09	1.8614	0.0310234	124.093
36	400	1770000	94900		746.048				7.46048e-07	2.45034e-09	2.45034	0.0408391	163.356
37	500	1970000	98300		801.628				8.01628e-07	2.63289e-09	2.63289	0.0438815	175.526
38	800	2460000	102000		964.706				9.64706e-07	3.16851e-09	3.16851	0.0528085	211.234
39	1200	2690000	93000		1156.99				1.15699e-06	3.80005e-09	3.80005	0.0633342	253.337
40	1600	2800000	113000		991.15				9.9115e-07	3.25536e-09	3.25536	0.0542561	217.024
41	50	6610	77000		3.43377				3.43377e-09	1.1278e-11	0.011278	0.000187966	0.751864
42	100	15500	78400		7.90816				7.90816e-09	2.59738e-11	0.0259738	0.000432897	1.73159
43	150	26900	76500		14.0654				1.40654e-08	4.61967e-11	0.0461967	0.000769945	3.07978
44	200	42900	76900		22.3147				2.23147e-08	7.3291e-11	0.073291	0.00122152	4.88607
45	300	108000	83000		52.0482				5.20482e-08	1.70949e-10	0.170949	0.00284914	11.3966
46	400	162000	79900		81.1014				8.11014e-08	2.66372e-10	0.266372	0.00443953	17.7581
47	500	177000	82900		85.4041				8.54041e-08	2.80504e-10	0.280504	0.00467506	18.7002
48	800	205000	86000		95.3488				9.53488e-08	3.13167e-10	0.313167	0.00521944	20.8778
49	1200	232000	86800		106.912				1.06912e-07	3.51146e-10	0.351146	0.00585244	23.4098
50	1600	253000	95300		106.191				1.06191e-07	3.48777e-10	0.348777	0.00581295	23.2518
51	50	12300	73100		6.73051				6.73051e-09	2.21059e-11	0.0221059	0.000368431	1.47372
52	100	30700	75800		16.2005				1.62005e-08	5.32095e-11	0.0532095	0.000886825	3.5473
53	150	50900	75700		26.8956				2.68956e-08	8.83368e-11	0.0883368	0.00147228	5.88912
54	200	76000	73500		41.3605				4.13605e-08	1.35846e-10	0.135846	0.0022641	9.05639
55	300	231000	87500		105.6				1.056e-07	3.46836e-10	0.346836	0.0057806	23.1224
56	400	365000	84200		173.397				1.73397e-07	5.69509e-10	0.569509	0.00949182	37.9673
57	500	395000	91500		172.678				1.72678e-07	5.67147e-10	0.567147	0.00945246	37.8098
58	800	455000	92600		196.544				1.96544e-07	6.45536e-10	0.645536	0.0107589	43.0357
59	1200	541000	89200		242.601				2.42601e-07	7.96805e-10	0.796805	0.0132801	53.1204
60	1600	582000	101000		230.495				2.30495e-07	7.57045e-10	0.757045	0.0126174	50.4696
61	50	16600	77000		8.62338				8.62338e-09	2.83229e-11	0.0283229	0.000472048	1.88819
62	100	41200	80400		20.4975				2.04975e-08	6.73226e-11	0.0673226	0.00112204	4.48818
63	150	76500	77400		39.5349				3.95349e-08	1.2985e-10	0.12985	0.00216416	8.65664
64	200	124000	84400		58.7678				5.87678e-08	1.93019e-10	0.193019	0.00321698	12.8679
64	300	335000	88000		152.273				1.52273e-07	5.00129e-10	0.500129	0.00833548	33.3419
64	400	582000	89100		261.279				2.61279e-07	8.58154e-10	0.858154	0.0143026	57.2103
64	500	592000	83100		284.958				2.84958e-07	9.35924e-10	0.935924	0.0155987	62.3949
64	800	683000	92900		294.08				2.9408e-07	9.65884e-10	0.965884	0.0160981	64.3923
64	1200	807000	91200		353.947				3.53947e-07	1.16252e-09	1.16252	0.0193753	77.501
64	1600	935000	99100		377.397				3.77397e-07	1.23953e-09	1.23953	0.0206589	82.6355
64	50	25700	72900		14.1015				1.41015e-08	4.63154e-11	0.0463154	0.000771923	3.08769
64	100	56200	73800		30.4607				3.04607e-08	1.00046e-10	0.100046	0.00166743	6.66974
64	150	107000	80200		53.3666				5.33666e-08	1.75279e-10	0.175279	0.00292131	11.6853
64	200	185000	84200		87.886				8.7886e-08	2.88655e-10	0.288655	0.00481092	19.2437
64	300	533000	97200		219.342				2.19342e-07	7.20412e-10	0.720412	0.0120069	48.0275
64	400	850000	85200		399.061				3.99061e-07	1.31069e-09	1.31069	0.0218448	87.3792
64	500	829000	91100		363.996				3.63996e-07	1.19552e-09	1.19552	0.0199253	79.7012
64	800	949000	94200		402.972				4.02972e-07	1.32353e-09	1.32353	0.0220589	88.2356
64	1200	1260000	99700		505.517				5.05517e-07	1.66033e-09	1.66033	0.0276722	110.689
64	1600	1210000	102000		474.51				4.7451e-07	1.55849e-09	1.55849	0.0259749	103.9

## Sheet: conversion before graphs
50	0.841675			wt	50	100	150	200	300	400	500	800	1200	1600
100	2.68072			15	0.841675	2.68072	5.3261	9.02659	22.7343	36.7128	41.504	49.775	55.3915	56.4
150	5.3261			30	1.79377	5.44038	11.5215	19.4287	58.9751	86.6911	87.3966	105.444	112.486	115.764
200	9.02659			45	2.59348	9.1065	17.958	30.5578	90.6969	121.138	128.801	165.067	181.636	170.678
300	22.7343			60	3.3059	11.3804	23.2713	39.532	124.093	163.356	175.526	211.234	253.337	217.024
400	36.7128			N65D mut 19	50	100	150	200	300	400	500	800	1200	1600
500	41.504			15	0.751864	1.73159	3.07978	4.88607	11.3966	17.7581	18.7002	20.8778	23.4098	23.2518
800	49.775			30	1.47372	3.5473	5.88912	9.05639	23.1224	37.9673	37.8098	43.0357	53.1204	50.4696
1200	55.3915			45	1.88819	4.48818	8.65664	12.8679	33.3419	57.2103	62.3949	64.3923	77.501	82.6355
1600	56.4			60	3.08769	6.66974	11.6853	19.2437	48.0275	87.3792	79.7012	88.2356	110.689	103.9
50	1.79377
100	5.44038
150	11.5215
200	19.4287
300	58.9751
400	86.6911
500	87.3966
800	105.444
1200	112.486
1600	115.764
50	2.59348
100	9.1065
150	17.958
200	30.5578
300	90.6969
400	121.138
500	128.801
800	165.067
1200	181.636
1600	170.678
50	3.3059
100	11.3804
150	23.2713
200	39.532
300	124.093
400	163.356
500	175.526
800	211.234
1200	253.337
1600	217.024
50	0.751864
100	1.73159
150	3.07978
200	4.88607
300	11.3966
400	17.7581
500	18.7002
800	20.8778
1200	23.4098
1600	23.2518
50	1.47372
100	3.5473
150	5.88912
200	9.05639
300	23.1224
400	37.9673
500	37.8098
800	43.0357
1200	53.1204
1600	50.4696
50	1.88819
100	4.48818
150	8.65664
200	12.8679
300	33.3419
400	57.2103
500	62.3949
800	64.3923
1200	77.501
1600	82.6355
50	3.08769
100	6.66974
150	11.6853
200	19.2437
300	48.0275
400	87.3792
500	79.7012
800	88.2356
1200	110.689
1600	103.9

## Sheet: PAPC WT 6-21A
wt	50	100	150	200	300	400	500	800	1200	1600
0	0	0	0	0	0	0	0	0	0	0
15	0.841675	2.68072	5.3261	9.02659	22.7343	36.7128	41.504	49.775	55.3915	56.4
30	1.79377	5.44038	11.5215	19.4287	58.9751	86.6911	87.3966	105.444	112.486	115.764
45	2.59348	9.1065	17.958	30.5578	90.6969	121.138	128.801	165.067	181.636	170.678
60	3.3059	11.3804	23.2713	39.532	124.093	163.356	175.526	211.234	253.337	217.024
concentration	slope
0	0
50	0.0558
100	0.1946
150	0.3945
200	0.6706
300	2.1077
400	2.7409
500	2.9223
800	3.5851
1200	4.2195
1600	3.6555

## Sheet: PAPC Mut19 N65D 
mut19	50	100	150	200	300	400	500	800	1200	1600
0	0	0	0	0	0	0	0	0	0	0
15	0.751864	1.73159	3.07978	4.88607	11.3966	17.7581	18.7002	20.8778	23.4098	23.2518
30	1.47372	3.5473	5.88912	9.05639	23.1224	37.9673	37.8098	43.0357	53.1204	50.4696
45	1.88819	4.48818	8.65664	12.8679	33.3419	57.2103	62.3949	64.3923	77.501	82.6355
60	3.08769	6.66974	11.6853	19.2437	48.0275	87.3792	79.7012	88.2356	110.689	103.9
concentration	slope
0	0
50	0.0487
100	0.1073
150	0.193
200	0.3098
300	0.7867
400	1.4281
500	1.354
800	1.4666
1200	1.8365
1600	1.7812
