# Supplementary material for: Structural basis of phosphatidylcholine recognition by the C2–domain of cytosolic phospholipase A2α
Source: eLife journal article supplement (doi:10.7554/elife.44760), 2019-05-03
Supplement: supp [file 2018-08-04_kinetics 250ng WT and mut17 N64A PAPC 2mM Tx100 KmB, 10 Concentrations.xlsx]

## Sheet: Raw Data
	Sample Name		AA	AA d8
1	1		16400	83800
2	2		47400	86900
3	3		93700	90900
4	4		87300	83800
5	5		247000	89300
6	6		388000	95000
7	7		452000	96800
8	8		560000	99400
9	9		612000	100000
10	10		713000	105000
11	11		34600	89000
12	12		96200	86700
13	13		198000	90800
14	14		194000	92800
15	15		621000	94800
16	16		948000	106000
17	17		1120000	102000
18	18		1330000	105000
19	19		1350000	110000
20	20		1560000	108000
21	21		48400	85600
22	22		143000	90500
23	23		361000	99600
24	24		293000	88500
25	25		866000	95600
26	26		1470000	104000
27	27		1620000	102000
28	28		1970000	108000
29	29		2280000	118000
30	30		2490000	111000
31	31		62200	85200
32	32		187000	87500
33	33		511000	99600
34	34		422000	94100
35	35		1270000	105000
36	36		2120000	107000
37	37		2460000	108000
38	38		2870000	132000
39	39		3150000	131000
40	40		3470000	117000
41	41		10000	85400
42	42		33000	88100
43	43		35900	82500
44	44		101000	85200
45	45		226000	92000
46	46		359000	100000
47	47		347000	97500
48	48		466000	95000
49	49		585000	98200
50	50		644000	101000
51	51		20500	85300
52	52		64900	86700
53	53		75400	83000
54	54		246000	91200
55	55		582000	101000
56	56		818000	104000
57	57		782000	104000
58	58		1100000	108000
59	59		1330000	108000
60	60		1370000	102000
61	61		30300	86400
62	62		94700	75700
63	63		117000	82300
64	64		379000	98000
65	65		940000	103000
66	66		1340000	96300
67	67		1310000	102000
68	68		1830000	107000
69	69		1940000	109000
70	70		2160000	108000
71	71		42400	88000
72	72		138000	86300
73	73		156000	85900
74	74		552000	93700
75	75		1310000	106000
76	76		1860000	109000
77	77		1780000	101000
78	78		2400000	111000
79	79		2800000	107000
80	80		2810000	113000

## Sheet: AA
	Sample Name	AA	AA d8		ng AA		avg		gram of AA	mol AA	nmol AA	nmol AA/min	nmol AA/min/mg cpla2					19	N65D
1	50	16400	83800		7.82816				7.82816e-09	2.5711e-11	0.025711	0.000428517	1.71407					20	A94Y
2	100	47400	86900		21.8182				2.18182e-08	7.16603e-11	0.0716603	0.00119434	4.77735					21	A94F
3	150	93700	90900		41.2321				4.12321e-08	1.35424e-10	0.135424	0.00225707	9.02827					22	Y96A
4	200	87300	83800		41.6706				4.16706e-08	1.36864e-10	0.136864	0.00228107	9.12429
5	300	247000	89300		110.638				1.10638e-07	3.63384e-10	0.363384	0.00605639	24.2256
6	400	388000	95000		163.368				1.63368e-07	5.36572e-10	0.536572	0.00894287	35.7715
7	500	452000	96800		186.777				1.86777e-07	6.13455e-10	0.613455	0.0102243	40.897
8	800	560000	99400		225.352				2.25352e-07	7.40153e-10	0.740153	0.0123359	49.3435
9	1200	612000	100000		244.8				2.448e-07	8.04028e-10	0.804028	0.0134005	53.6019
10	1600	713000	105000		271.619				2.71619e-07	8.92114e-10	0.892114	0.0148686	59.4742
11	50	34600	89000		15.5506				1.55506e-08	5.10747e-11	0.0510747	0.000851245	3.40498
12	100	96200	86700		44.3829				4.43829e-08	1.45773e-10	0.145773	0.00242954	9.71817
13	150	198000	90800		87.2247				8.72247e-08	2.86483e-10	0.286483	0.00477472	19.0989
14	200	194000	92800		83.6207				8.36207e-08	2.74646e-10	0.274646	0.00457744	18.3097
15	300	621000	94800		262.025				2.62025e-07	8.60604e-10	0.860604	0.0143434	57.3736
16	400	948000	106000		357.736				3.57736e-07	1.17496e-09	1.17496	0.0195826	78.3305
17	500	1120000	102000		439.216				4.39216e-07	1.44257e-09	1.44257	0.0240429	96.1715
18	800	1330000	105000		506.667				5.06667e-07	1.66411e-09	1.66411	0.0277352	110.941
19	1200	1350000	110000		490.909				4.90909e-07	1.61236e-09	1.61236	0.0268726	107.49
20	1600	1560000	108000		577.778				5.77778e-07	1.89767e-09	1.89767	0.0316278	126.511
21	50	48400	85600		22.6168				2.26168e-08	7.42834e-11	0.0742834	0.00123806	4.95222
22	100	143000	90500		63.2044				6.32044e-08	2.0759e-10	0.20759	0.00345984	13.8394
23	150	361000	99600		144.98				1.4498e-07	4.76176e-10	0.476176	0.00793627	31.7451
24	200	293000	88500		132.429				1.32429e-07	4.34955e-10	0.434955	0.00724925	28.997
25	300	866000	95600		362.343				3.62343e-07	1.19009e-09	1.19009	0.0198348	79.3394
26	400	1470000	104000		565.385				5.65385e-07	1.85697e-09	1.85697	0.0309494	123.798
27	500	1620000	102000		635.294				6.35294e-07	2.08658e-09	2.08658	0.0347763	139.105
28	800	1970000	108000		729.63				7.2963e-07	2.39642e-09	2.39642	0.0399403	159.761
29	1200	2280000	118000		772.881				7.72881e-07	2.53847e-09	2.53847	0.0423079	169.232
30	1600	2490000	111000		897.297				8.97297e-07	2.94711e-09	2.94711	0.0491185	196.474
31	50	62200	85200		29.2019				2.92019e-08	9.59115e-11	0.0959115	0.00159853	6.3941
32	100	187000	87500		85.4857				8.54857e-08	2.80772e-10	0.280772	0.00467953	18.7181
33	150	511000	99600		205.221				2.05221e-07	6.74033e-10	0.674033	0.0112339	44.9356
34	200	422000	94100		179.384				1.79384e-07	5.89173e-10	0.589173	0.00981955	39.2782
35	300	1270000	105000		483.81				4.8381e-07	1.58904e-09	1.58904	0.026484	105.936
36	400	2120000	107000		792.523				7.92523e-07	2.60299e-09	2.60299	0.0433831	173.532
37	500	2460000	108000		911.111				9.11111e-07	2.99248e-09	2.99248	0.0498747	199.499
38	800	2870000	132000		869.697				8.69697e-07	2.85646e-09	2.85646	0.0476076	190.431
39	1200	3150000	131000		961.832				9.61832e-07	3.15907e-09	3.15907	0.0526512	210.605
40	1600	3470000	117000		1186.32				1.18632e-06	3.8964e-09	3.8964	0.06494	259.76
41	50	10000	85400		4.68384				4.68384e-09	1.53837e-11	0.0153837	0.000256396	1.02558
42	100	33000	88100		14.983				1.4983e-08	4.92105e-11	0.0492105	0.000820175	3.2807
43	150	35900	82500		17.4061				1.74061e-08	5.7169e-11	0.057169	0.000952816	3.81127
44	200	101000	85200		47.4178				4.74178e-08	1.55741e-10	0.155741	0.00259568	10.3827
45	300	226000	92000		98.2609				9.82609e-08	3.22731e-10	0.322731	0.00537885	21.5154
46	400	359000	100000		143.6				1.436e-07	4.71644e-10	0.471644	0.00786073	31.4429
47	500	347000	97500		142.359				1.42359e-07	4.67568e-10	0.467568	0.0077928	31.1712
48	800	466000	95000		196.211				1.96211e-07	6.4444e-10	0.64444	0.0107407	42.9626
49	1200	585000	98200		238.289				2.38289e-07	7.82644e-10	0.782644	0.0130441	52.1763
50	1600	644000	101000		255.05				2.5505e-07	8.37692e-10	0.837692	0.0139615	55.8461
51	50	20500	85300		9.61313				9.61313e-09	3.15736e-11	0.0315736	0.000526227	2.10491
52	100	64900	86700		29.9423				2.99423e-08	9.83435e-11	0.0983435	0.00163906	6.55623
53	150	75400	83000		36.3373				3.63373e-08	1.19347e-10	0.119347	0.00198912	7.9565
54	200	246000	91200		107.895				1.07895e-07	3.54373e-10	0.354373	0.00590621	23.6248
55	300	582000	101000		230.495				2.30495e-07	7.57045e-10	0.757045	0.0126174	50.4696
56	400	818000	104000		314.615				3.14615e-07	1.03333e-09	1.03333	0.0172222	68.8888
57	500	782000	104000		300.769				3.00769e-07	9.87855e-10	0.987855	0.0164643	65.857
58	800	1100000	108000		407.407				4.07407e-07	1.3381e-09	1.3381	0.0223017	89.2067
59	1200	1330000	108000		492.593				4.92593e-07	1.61789e-09	1.61789	0.0269648	107.859
60	1600	1370000	102000		537.255				5.37255e-07	1.76458e-09	1.76458	0.0294096	117.638
61	50	30300	86400		14.0278				1.40278e-08	4.60732e-11	0.0460732	0.000767887	3.07155
62	100	94700	75700		50.0396				5.00396e-08	1.64352e-10	0.164352	0.00273919	10.9568
63	150	117000	82300		56.8651				5.68651e-08	1.86769e-10	0.186769	0.00311282	12.4513
64	200	379000	98000		154.694				1.54694e-07	5.08081e-10	0.508081	0.00846802	33.8721
64	300	940000	103000		365.049				3.65049e-07	1.19898e-09	1.19898	0.0199829	79.9317
64	400	1340000	96300		556.594				5.56594e-07	1.82809e-09	1.82809	0.0304682	121.873
64	500	1310000	102000		513.725				5.13725e-07	1.6873e-09	1.6873	0.0281216	112.486
64	800	1830000	107000		684.112				6.84112e-07	2.24692e-09	2.24692	0.0374486	149.795
64	1200	1940000	109000		711.927				7.11927e-07	2.33827e-09	2.33827	0.0389712	155.885
64	1600	2160000	108000		800				8e-07	2.62754e-09	2.62754	0.0437924	175.17
64	50	42400	88000		19.2727				1.92727e-08	6.32999e-11	0.0632999	0.001055	4.21999
64	100	138000	86300		63.9629				6.39629e-08	2.10082e-10	0.210082	0.00350136	14.0054
64	150	156000	85900		72.6426				7.26426e-08	2.3859e-10	0.23859	0.00397649	15.906
64	200	552000	93700		235.646				2.35646e-07	7.73962e-10	0.773962	0.0128994	51.5974
64	300	1310000	106000		494.34				4.9434e-07	1.62362e-09	1.62362	0.0270604	108.242
64	400	1860000	109000		682.569				6.82569e-07	2.24185e-09	2.24185	0.0373641	149.457
64	500	1780000	101000		704.95				7.0495e-07	2.31536e-09	2.31536	0.0385893	154.357
64	800	2400000	111000		864.865				8.64865e-07	2.84059e-09	2.84059	0.0473431	189.372
64	1200	2800000	107000		1046.73				1.04673e-06	3.43791e-09	3.43791	0.0572985	229.194
64	1600	2810000	113000		994.69				9.9469e-07	3.26699e-09	3.26699	0.0544498	217.799

## Sheet: conversion before graphs
50	1.71407			wt	50	100	150	200	300	400	500	800	1200	1600
100	4.77735			15	1.71407	4.77735	9.02827	9.12429	24.2256	35.7715	40.897	49.3435	53.6019	59.4742
150	9.02827			30	3.40498	9.71817	19.0989	18.3097	57.3736	78.3305	96.1715	110.941	107.49	126.511
200	9.12429			45	4.95222	13.8394	31.7451	28.997	79.3394	123.798	139.105	159.761	169.232	196.474
300	24.2256			60	6.3941	18.7181	44.9356	39.2782	105.936	173.532	199.499	190.431	210.605	259.76
400	35.7715			N64A mut 17	50	100	150	200	300	400	500	800	1200	1600
500	40.897			15	1.02558	3.2807	3.81127	10.3827	21.5154	31.4429	31.1712	42.9626	52.1763	55.8461
800	49.3435			30	2.10491	6.55623	7.9565	23.6248	50.4696	68.8888	65.857	89.2067	107.859	117.638
1200	53.6019			45	3.07155	10.9568	12.4513	33.8721	79.9317	121.873	112.486	149.795	155.885	175.17
1600	59.4742			60	4.21999	14.0054	15.906	51.5974	108.242	149.457	154.357	189.372	229.194	217.799
50	3.40498
100	9.71817
150	19.0989
200	18.3097
300	57.3736
400	78.3305
500	96.1715
800	110.941
1200	107.49
1600	126.511
50	4.95222
100	13.8394
150	31.7451
200	28.997
300	79.3394
400	123.798
500	139.105
800	159.761
1200	169.232
1600	196.474
50	6.3941
100	18.7181
150	44.9356
200	39.2782
300	105.936
400	173.532
500	199.499
800	190.431
1200	210.605
1600	259.76
50	1.02558
100	3.2807
150	3.81127
200	10.3827
300	21.5154
400	31.4429
500	31.1712
800	42.9626
1200	52.1763
1600	55.8461
50	2.10491
100	6.55623
150	7.9565
200	23.6248
300	50.4696
400	68.8888
500	65.857
800	89.2067
1200	107.859
1600	117.638
50	3.07155
100	10.9568
150	12.4513
200	33.8721
300	79.9317
400	121.873
500	112.486
800	149.795
1200	155.885
1600	175.17
50	4.21999
100	14.0054
150	15.906
200	51.5974
300	108.242
400	149.457
500	154.357
800	189.372
1200	229.194
1600	217.799

## Sheet: PAPC WT 6-21A
wt	50	100	150	200	300	400	500	800	1200	1600
0	0	0	0	0	0	0	0	0	0	0
15	1.71407	4.77735	9.02827	9.12429	24.2256	35.7715	40.897	49.3435	53.6019	59.4742
30	3.40498	9.71817	19.0989	18.3097	57.3736	78.3305	96.1715	110.941	107.49	126.511
45	4.95222	13.8394	31.7451	28.997	79.3394	123.798	139.105	159.761	169.232	196.474
60	6.3941	18.7181	44.9356	39.2782	105.936	173.532	199.499	190.431	210.605	259.76
concentration	slope
0	0
50	0.1068
100	0.31
150	0.7506
200	0.6562
300	1.7799
400	2.9006
500	3.3147
800	3.2752
1200	3.5789
1600	4.3768

## Sheet: PAPC Mut17 N64A 
mut17	50	100	150	200	300	400	500	800	1200	1600
0	0	0	0	0	0	0	0	0	0	0
15	1.02558	3.2807	3.81127	10.3827	21.5154	31.4429	31.1712	42.9626	52.1763	55.8461
30	2.10491	6.55623	7.9565	23.6248	50.4696	68.8888	65.857	89.2067	107.859	117.638
45	3.07155	10.9568	12.4513	33.8721	79.9317	121.873	112.486	149.795	155.885	175.17
60	4.21999	14.0054	15.906	51.5974	108.242	149.457	154.357	189.372	229.194	217.799
concentration	slope
0	0
50	0.0699
100	0.2379
150	0.2697
200	0.8446
300	1.8327
400	2.5956
500	2.6002
800	3.2372
1200	3.7473
1600	3.6995
