# Supplementary material for: Structural basis of phosphatidylcholine recognition by the C2–domain of cytosolic phospholipase A2α
Source: eLife journal article supplement (doi:10.7554/elife.44760), 2019-05-03
Supplement: supp [file 2018-08-07_kinetics 250ng WT and mut23 Y96F PAPC 2mM Tx100 KmB, 10 Concentrations.xlsx]

## Sheet: Raw Data
	Sample Name		AA	AA d8
1	1		11200	70800
2	2		38200	71100
3	3		73700	77700
4	4		80100	74400
5	5		268000	82100
6	6		358000	83500
7	7		440000	86000
8	8		481000	89000
9	9		613000	91500
10	10		630000	93500
11	11		21900	75600
12	12		84500	74900
13	13		158000	86700
14	14		182000	79900
15	15		603000	91500
16	16		845000	86800
17	17		981000	90100
18	18		1100000	90400
19	19		1330000	94100
20	20		1310000	100000
21	21		31700	72500
22	22		136000	78000
23	23		238000	78700
24	24		293000	82400
25	25		1000000	88300
26	26		1380000	96300
27	27		1540000	91900
28	28		1770000	96100
29	29		2120000	93700
30	30		2040000	97000
31	31		42600	74200
32	32		187000	81900
33	33		341000	78900
34	34		424000	84800
35	35		1430000	94300
36	36		1850000	93300
37	37		2230000	95400
38	38		2330000	93800
39	39		2690000	97100
40	40		2870000	101000
41	41		14900	71700
42	42		39900	74000
43	43		73800	71900
44	44		137000	80600
45	45		293000	79400
46	46		466000	88000
47	47		490000	78500
48	48		603000	90300
49	49		676000	85800
50	50		720000	96700
51	51		25800	70900
52	52		80200	73200
53	53		163000	75800
54	54		286000	76300
55	55		730000	85100
56	56		1070000	91400
57	57		1160000	91000
58	58		1290000	92600
59	59		1330000	108000
60	60		1370000	102000
61	61		30300	86400
62	62		94700	75700
63	63		117000	82300
64	64		379000	98000
65	65		940000	103000
66	66		1340000	96300
67	67		1310000	102000
68	68		1830000	107000
69	69		1940000	109000
70	70		2160000	108000
71	71		42400	88000
72	72		138000	86300
73	73		156000	85900
74	74		552000	93700
75	75		1310000	106000
76	76		1860000	109000
77	77		1780000	101000
78	78		2400000	111000
79	79		2800000	107000
80	80		2810000	113000

## Sheet: AA
	Sample Name	AA	AA d8		ng AA		avg		gram of AA	mol AA	nmol AA	nmol AA/min	nmol AA/min/mg cpla2					19	N65D
1	50	11200	70800		6.32768				6.32768e-09	2.07828e-11	0.0207828	0.00034638	1.38552					20	A94Y
2	100	38200	71100		21.4909				2.14909e-08	7.05852e-11	0.0705852	0.00117642	4.70568					21	A94F
3	150	73700	77700		37.9408				3.79408e-08	1.24614e-10	0.124614	0.0020769	8.30759					22	Y96A
4	200	80100	74400		43.0645				4.30645e-08	1.41442e-10	0.141442	0.00235737	9.42949
5	300	268000	82100		130.572				1.30572e-07	4.28856e-10	0.428856	0.0071476	28.5904
6	400	358000	83500		171.497				1.71497e-07	5.6327e-10	0.56327	0.00938783	37.5513
7	500	440000	86000		204.651				2.04651e-07	6.72162e-10	0.672162	0.0112027	44.8108
8	800	481000	89000		216.18				2.1618e-07	7.10027e-10	0.710027	0.0118338	47.3351
9	1200	613000	91500		267.978				2.67978e-07	8.80155e-10	0.880155	0.0146693	58.677
10	1600	630000	93500		269.519				2.69519e-07	8.85215e-10	0.885215	0.0147536	59.0143
11	50	21900	75600		11.5873				1.15873e-08	3.80577e-11	0.0380577	0.000634295	2.53718
12	100	84500	74900		45.1268				4.51268e-08	1.48216e-10	0.148216	0.00247027	9.88106
13	150	158000	86700		72.895				7.2895e-08	2.39419e-10	0.239419	0.00399031	15.9612
14	200	182000	79900		91.1139				9.11139e-08	2.99257e-10	0.299257	0.00498762	19.9505
15	300	603000	91500		263.607				2.63607e-07	8.65797e-10	0.865797	0.01443	57.7198
16	400	845000	86800		389.401				3.89401e-07	1.27896e-09	1.27896	0.021316	85.264
17	500	981000	90100		435.516				4.35516e-07	1.43042e-09	1.43042	0.0238404	95.3615
18	800	1100000	90400		486.726				4.86726e-07	1.59862e-09	1.59862	0.0266436	106.574
19	1200	1330000	94100		565.356				5.65356e-07	1.85687e-09	1.85687	0.0309479	123.791
20	1600	1310000	100000		524				5.24e-07	1.72104e-09	1.72104	0.028684	114.736
21	50	31700	72500		17.4897				1.74897e-08	5.74435e-11	0.0574435	0.000957392	3.82957
22	100	136000	78000		69.7436				6.97436e-08	2.29068e-10	0.229068	0.0038178	15.2712
23	150	238000	78700		120.966				1.20966e-07	3.97303e-10	0.397303	0.00662172	26.4869
24	200	293000	82400		142.233				1.42233e-07	4.67154e-10	0.467154	0.0077859	31.1436
25	300	1000000	88300		453.001				4.53001e-07	1.48785e-09	1.48785	0.0247975	99.19
26	400	1380000	96300		573.209				5.73209e-07	1.88266e-09	1.88266	0.0313777	125.511
27	500	1540000	91900		670.294				6.70294e-07	2.20153e-09	2.20153	0.0366922	146.769
28	800	1770000	96100		736.733				7.36733e-07	2.41975e-09	2.41975	0.0403291	161.316
29	1200	2120000	93700		905.016				9.05016e-07	2.97246e-09	2.97246	0.049541	198.164
30	1600	2040000	97000		841.237				8.41237e-07	2.76298e-09	2.76298	0.0460497	184.199
31	50	42600	74200		22.965				2.2965e-08	7.54268e-11	0.0754268	0.00125711	5.02845
32	100	187000	81900		91.3309				9.13309e-08	2.9997e-10	0.29997	0.0049995	19.998
33	150	341000	78900		172.877				1.72877e-07	5.67802e-10	0.567802	0.00946337	37.8535
34	200	424000	84800		200				2e-07	6.56886e-10	0.656886	0.0109481	43.7924
35	300	1430000	94300		606.575				6.06575e-07	1.99225e-09	1.99225	0.0332042	132.817
36	400	1850000	93300		793.14				7.9314e-07	2.60501e-09	2.60501	0.0434169	173.668
37	500	2230000	95400		935.01				9.3501e-07	3.07098e-09	3.07098	0.0511829	204.732
38	800	2330000	93800		993.603				9.93603e-07	3.26342e-09	3.26342	0.0543903	217.561
39	1200	2690000	97100		1108.14				1.10814e-06	3.63959e-09	3.63959	0.0606599	242.64
40	1600	2870000	101000		1136.63				1.13663e-06	3.73319e-09	3.73319	0.0622199	248.88
41	50	14900	71700		8.31241				8.31241e-09	2.73015e-11	0.0273015	0.000455026	1.8201
42	100	39900	74000		21.5676				2.15676e-08	7.08372e-11	0.0708372	0.00118062	4.72248
43	150	73800	71900		41.057				4.1057e-08	1.34849e-10	0.134849	0.00224748	8.98993
44	200	137000	80600		67.9901				6.79901e-08	2.23309e-10	0.223309	0.00372181	14.8872
45	300	293000	79400		147.607				1.47607e-07	4.84805e-10	0.484805	0.00808008	32.3203
46	400	466000	88000		211.818				2.11818e-07	6.95702e-10	0.695702	0.011595	46.3801
47	500	490000	78500		249.682				2.49682e-07	8.20061e-10	0.820061	0.0136677	54.6708
48	800	603000	90300		267.11				2.6711e-07	8.77303e-10	0.877303	0.0146217	58.4868
49	1200	676000	85800		315.152				3.15152e-07	1.03509e-09	1.03509	0.0172515	69.0062
50	1600	720000	96700		297.828				2.97828e-07	9.78196e-10	0.978196	0.0163033	65.2131
51	50	25800	70900		14.5557				1.45557e-08	4.78072e-11	0.0478072	0.000796787	3.18715
52	100	80200	73200		43.8251				4.38251e-08	1.43941e-10	0.143941	0.00239901	9.59604
53	150	163000	75800		86.0158				8.60158e-08	2.82513e-10	0.282513	0.00470855	18.8342
54	200	286000	76300		149.934				1.49934e-07	4.92449e-10	0.492449	0.00820749	32.8299
55	300	730000	85100		343.126				3.43126e-07	1.12697e-09	1.12697	0.0187829	75.1315
56	400	1070000	91400		468.271				4.68271e-07	1.538e-09	1.538	0.0256334	102.534
57	500	1160000	91000		509.89				5.0989e-07	1.6747e-09	1.6747	0.0279116	111.647
58	800	1290000	92600		557.235				5.57235e-07	1.8302e-09	1.8302	0.0305033	122.013
59	1200	1330000	108000		492.593				4.92593e-07	1.61789e-09	1.61789	0.0269648	107.859
60	1600	1370000	102000		537.255				5.37255e-07	1.76458e-09	1.76458	0.0294096	117.638
61	50	30300	86400		14.0278				1.40278e-08	4.60732e-11	0.0460732	0.000767887	3.07155
62	100	94700	75700		50.0396				5.00396e-08	1.64352e-10	0.164352	0.00273919	10.9568
63	150	117000	82300		56.8651				5.68651e-08	1.86769e-10	0.186769	0.00311282	12.4513
64	200	379000	98000		154.694				1.54694e-07	5.08081e-10	0.508081	0.00846802	33.8721
64	300	940000	103000		365.049				3.65049e-07	1.19898e-09	1.19898	0.0199829	79.9317
64	400	1340000	96300		556.594				5.56594e-07	1.82809e-09	1.82809	0.0304682	121.873
64	500	1310000	102000		513.725				5.13725e-07	1.6873e-09	1.6873	0.0281216	112.486
64	800	1830000	107000		684.112				6.84112e-07	2.24692e-09	2.24692	0.0374486	149.795
64	1200	1940000	109000		711.927				7.11927e-07	2.33827e-09	2.33827	0.0389712	155.885
64	1600	2160000	108000		800				8e-07	2.62754e-09	2.62754	0.0437924	175.17
64	50	42400	88000		19.2727				1.92727e-08	6.32999e-11	0.0632999	0.001055	4.21999
64	100	138000	86300		63.9629				6.39629e-08	2.10082e-10	0.210082	0.00350136	14.0054
64	150	156000	85900		72.6426				7.26426e-08	2.3859e-10	0.23859	0.00397649	15.906
64	200	552000	93700		235.646				2.35646e-07	7.73962e-10	0.773962	0.0128994	51.5974
64	300	1310000	106000		494.34				4.9434e-07	1.62362e-09	1.62362	0.0270604	108.242
64	400	1860000	109000		682.569				6.82569e-07	2.24185e-09	2.24185	0.0373641	149.457
64	500	1780000	101000		704.95				7.0495e-07	2.31536e-09	2.31536	0.0385893	154.357
64	800	2400000	111000		864.865				8.64865e-07	2.84059e-09	2.84059	0.0473431	189.372
64	1200	2800000	107000		1046.73				1.04673e-06	3.43791e-09	3.43791	0.0572985	229.194
64	1600	2810000	113000		994.69				9.9469e-07	3.26699e-09	3.26699	0.0544498	217.799

## Sheet: conversion before graphs
50	1.38552			wt	50	100	150	200	300	400	500	800	1200	1600
100	4.70568			15	1.38552	4.70568	8.30759	9.42949	28.5904	37.5513	44.8108	47.3351	58.677	59.0143
150	8.30759			30	2.53718	9.88106	15.9612	19.9505	57.7198	85.264	95.3615	106.574	123.791	114.736
200	9.42949			45	3.82957	15.2712	26.4869	31.1436	99.19	125.511	146.769	161.316	198.164	184.199
300	28.5904			60	5.02845	19.998	37.8535	43.7924	132.817	173.668	204.732	217.561	242.64	248.88
400	37.5513			Y96F mut 23	50	100	150	200	300	400	500	800	1200	1600
500	44.8108			15	1.8201	4.72248	8.98993	14.8872	32.3203	46.3801	54.6708	58.4868	69.0062	65.2131
800	47.3351			30	3.18715	9.59604	18.8342	32.8299	75.1315	102.534	111.647	122.013	107.859	117.638
1200	58.677			45	3.07155	10.9568	12.4513	33.8721	79.9317	121.873	112.486	149.795	155.885	175.17
1600	59.0143			60	4.21999	14.0054	15.906	51.5974	108.242	149.457	154.357	189.372	229.194	217.799
50	2.53718
100	9.88106
150	15.9612
200	19.9505
300	57.7198
400	85.264
500	95.3615
800	106.574
1200	123.791
1600	114.736
50	3.82957
100	15.2712
150	26.4869
200	31.1436
300	99.19
400	125.511
500	146.769
800	161.316
1200	198.164
1600	184.199
50	5.02845
100	19.998
150	37.8535
200	43.7924
300	132.817
400	173.668
500	204.732
800	217.561
1200	242.64
1600	248.88
50	1.8201
100	4.72248
150	8.98993
200	14.8872
300	32.3203
400	46.3801
500	54.6708
800	58.4868
1200	69.0062
1600	65.2131
50	3.18715
100	9.59604
150	18.8342
200	32.8299
300	75.1315
400	102.534
500	111.647
800	122.013
1200	107.859
1600	117.638
50	3.07155
100	10.9568
150	12.4513
200	33.8721
300	79.9317
400	121.873
500	112.486
800	149.795
1200	155.885
1600	175.17
50	4.21999
100	14.0054
150	15.906
200	51.5974
300	108.242
400	149.457
500	154.357
800	189.372
1200	229.194
1600	217.799

## Sheet: PAPC WT 6-21A
wt	50	100	150	200	300	400	500	800	1200	1600
0	0	0	0	0	0	0	0	0	0	0
15	1.38552	4.70568	8.30759	9.42949	28.5904	37.5513	44.8108	47.3351	58.677	59.0143
30	2.53718	9.88106	15.9612	19.9505	57.7198	85.264	95.3615	106.574	123.791	114.736
45	3.82957	15.2712	26.4869	31.1436	99.19	125.511	146.769	161.316	198.164	184.199
60	5.02845	19.998	37.8535	43.7924	132.817	173.668	204.732	217.561	242.64	248.88
concentration	slope
0	0
50	0.0833
100	0.3371
150	0.6259
200	0.7287
300	2.2416
400	2.902
500	3.4095
800	3.6607
1200	4.1615
1600	4.153

## Sheet: PAPC Mut23 Y96F
mut23	50	100	150	200	300	400	500	800	1200	1600
0	0	0	0	0	0	0	0	0	0	0
15	1.8201	4.72248	8.98993	14.8872	32.3203	46.3801	54.6708	58.4868	69.0062	65.2131
30	3.18715	9.59604	12.4513	32.8299	75.1315	102.534	111.647	122.013	107.859	117.638
45	3.07155	10.9568	15.906	33.8721	79.9317	121.873	112.486	149.795	155.885	175.17
60	4.21999	14.0054	18.8342	51.5974	108.242	149.457	154.357	189.372	229.194	217.799
concentration	slope
0	0
50	0.0646
100	0.2283
150	0.3412
200	0.8145
300	1.7606
400	2.496
500	2.4435
800	3.1337
1200	3.6351
1600	3.637
