# Supplementary material for: Structural basis of phosphatidylcholine recognition by the C2–domain of cytosolic phospholipase A2α
Source: eLife journal article supplement (doi:10.7554/elife.44760), 2019-05-03
Supplement: supp [file 2018-08-11_kinetics 250ng Mut 17 N64A and mut19 N65D PAPC 2mM Tx100 KmB, 10 Concentrations_2.xlsx]

## Sheet: Raw Data
	Sample Name		AA	AA d8
1	1		7290	72200
2	2		21200	67300
3	3		41700	71200
4	4		80900	73200
5	5		100000	73000
6	6		268000	83700
7	7		271000	84900
8	8		362000	87200
9	9		420000	87300
10	10		410000	79700
11	11		14100	75700
12	12		45500	75100
13	13		89100	71300
14	14		187000	78300
15	15		237000	84900
16	16		626000	89400
17	17		607000	89800
18	18		750000	91500
19	19		1010000	92200
20	20		943000	96800
21	21		19200	80000
22	22		71800	79000
23	23		149000	80200
24	24		289000	82200
25	25		393000	83800
26	26		1130000	95600
27	27		947000	87600
28	28		1250000	90200
29	29		1520000	94700
30	30		1640000	95000
31	31		29100	78900
32	32		99900	79700
33	33		201000	79700
34	34		422000	86600
35	35		544000	88200
36	36		1470000	90600
37	37		1250000	89000
38	38		1740000	98100
39	39		2080000	97500
40	40		2040000	100000
41	41		6940	73000
42	42		14700	76700
43	43		23600	80200
44	44		48300	80100
45	45		90600	82600
46	46		158000	80400
47	47		175000	83800
48	48		207000	92000
49	49		229000	93300
50	50		243000	85000
51	51		12000	74700
52	52		25600	73200
53	53		47800	71900
54	54		87500	79200
55	55		209000	81000
56	56		348000	90200
57	57		361000	83500
58	58		409000	89700
59	59		505000	91200
60	60		503000	89200
61	61		17200	80800
62	62		40400	78200
63	63		68600	77400
64	64		128000	77500
65	65		320000	88000
66	66		560000	93000
67	67		540000	88000
68	68		706000	98700
69	69		735000	95800
70	70		805000	92800
71	71		22700	76100
72	72		51400	75200
73	73		91500	84900
74	74		184000	82100
75	75		430000	86300
76	76		756000	94400
77	77		785000	96100
78	78		944000	93500
79	79		1110000	104000
80	80		1160000	98300

## Sheet: AA
	Sample Name	AA	AA d8		ng AA		avg		gram of AA	mol AA	nmol AA	nmol AA/min	nmol AA/min/mg cpla2					19	N65D
1	50	7290	72200		4.03878				4.03878e-09	1.32651e-11	0.0132651	0.000221085	0.884339					20	A94Y
2	100	21200	67300		12.6003				1.26003e-08	4.13848e-11	0.0413848	0.000689746	2.75899					21	A94F
3	150	41700	71200		23.427				2.3427e-08	7.69442e-11	0.0769442	0.0012824	5.12961					22	Y96A
4	200	80900	73200		44.2077				4.42077e-08	1.45197e-10	0.145197	0.00241995	9.67979
5	300	100000	73000		54.7945				5.47945e-08	1.79969e-10	0.179969	0.00299948	11.9979
6	400	268000	83700		128.076				1.28076e-07	4.20658e-10	0.420658	0.00701097	28.0439
7	500	271000	84900		127.68				1.2768e-07	4.19355e-10	0.419355	0.00698924	27.957
8	800	362000	87200		166.055				1.66055e-07	5.45396e-10	0.545396	0.00908993	36.3597
9	1200	420000	87300		192.44				1.9244e-07	6.32055e-10	0.632055	0.0105343	42.137
10	1600	410000	79700		205.772				2.05772e-07	6.75842e-10	0.675842	0.011264	45.0562
11	50	14100	75700		7.45046				7.45046e-09	2.44705e-11	0.0244705	0.000407842	1.63137
12	100	45500	75100		24.2344				2.42344e-08	7.9596e-11	0.079596	0.0013266	5.3064
13	150	89100	71300		49.986				4.9986e-08	1.64175e-10	0.164175	0.00273626	10.945
14	200	187000	78300		95.53				9.553e-08	3.13762e-10	0.313762	0.00522936	20.9174
15	300	237000	84900		111.661				1.11661e-07	3.66742e-10	0.366742	0.00611237	24.4495
16	400	626000	89400		280.089				2.80089e-07	9.19934e-10	0.919934	0.0153322	61.3289
17	500	607000	89800		270.379				2.70379e-07	8.88039e-10	0.888039	0.0148007	59.2026
18	800	750000	91500		327.869				3.27869e-07	1.07686e-09	1.07686	0.0179477	71.7908
19	1200	1010000	92200		438.178				4.38178e-07	1.43916e-09	1.43916	0.0239861	95.9443
20	1600	943000	96800		389.669				3.89669e-07	1.27984e-09	1.27984	0.0213307	85.3228
21	50	19200	80000		9.6				9.6e-09	3.15305e-11	0.0315305	0.000525509	2.10203
22	100	71800	79000		36.3544				3.63544e-08	1.19404e-10	0.119404	0.00199006	7.96024
23	150	149000	80200		74.3142				7.43142e-08	2.4408e-10	0.24408	0.004068	16.272
24	200	289000	82200		140.633				1.40633e-07	4.61898e-10	0.461898	0.0076983	30.7932
25	300	393000	83800		187.589				1.87589e-07	6.16124e-10	0.616124	0.0102687	41.075
26	400	1130000	95600		472.803				4.72803e-07	1.55289e-09	1.55289	0.0258815	103.526
27	500	947000	87600		432.42				4.3242e-07	1.42025e-09	1.42025	0.0236709	94.6835
28	800	1250000	90200		554.324				5.54324e-07	1.82064e-09	1.82064	0.030344	121.376
29	1200	1520000	94700		642.027				6.42027e-07	2.10869e-09	2.10869	0.0351449	140.58
30	1600	1640000	95000		690.526				6.90526e-07	2.26798e-09	2.26798	0.0377997	151.199
31	50	29100	78900		14.7529				1.47529e-08	4.84547e-11	0.0484547	0.000807578	3.23031
32	100	99900	79700		50.138				5.0138e-08	1.64675e-10	0.164675	0.00274458	10.9783
33	150	201000	79700		100.878				1.00878e-07	3.31328e-10	0.331328	0.00552213	22.0885
34	200	422000	86600		194.919				1.94919e-07	6.40198e-10	0.640198	0.01067	42.6799
35	300	544000	88200		246.712				2.46712e-07	8.10308e-10	0.810308	0.0135051	54.0205
36	400	1470000	90600		649.007				6.49007e-07	2.13162e-09	2.13162	0.0355269	142.108
37	500	1250000	89000		561.798				5.61798e-07	1.84518e-09	1.84518	0.0307531	123.012
38	800	1740000	98100		709.48				7.0948e-07	2.33024e-09	2.33024	0.0388373	155.349
39	1200	2080000	97500		853.333				8.53333e-07	2.80271e-09	2.80271	0.0467119	186.848
40	1600	2040000	100000		816				8.16e-07	2.68009e-09	2.68009	0.0446682	178.673
41	50	6940	73000		3.80274				3.80274e-09	1.24898e-11	0.0124898	0.000208164	0.832655
42	100	14700	76700		7.66623				7.66623e-09	2.51792e-11	0.0251792	0.000419653	1.67861
43	150	23600	80200		11.7706				1.17706e-08	3.86596e-11	0.0386596	0.000644327	2.57731
44	200	48300	80100		24.1199				2.41199e-08	7.92199e-11	0.0792199	0.00132033	5.28133
45	300	90600	82600		43.8741				4.38741e-08	1.44101e-10	0.144101	0.00240169	9.60676
46	400	158000	80400		78.607				7.8607e-08	2.58179e-10	0.258179	0.00430298	17.2119
47	500	175000	83800		83.5322				8.35322e-08	2.74356e-10	0.274356	0.00457259	18.2904
48	800	207000	92000		90				9e-08	2.95599e-10	0.295599	0.00492664	19.7066
49	1200	229000	93300		98.1779				9.81779e-08	3.22458e-10	0.322458	0.00537431	21.4972
50	1600	243000	85000		114.353				1.14353e-07	3.75584e-10	0.375584	0.00625974	25.0389
51	50	12000	74700		6.4257				6.4257e-09	2.11048e-11	0.0211048	0.000351746	1.40698
52	100	25600	73200		13.9891				1.39891e-08	4.59461e-11	0.0459461	0.000765769	3.06307
53	150	47800	71900		26.5925				2.65925e-08	8.73412e-11	0.0873412	0.00145569	5.82274
54	200	87500	79200		44.1919				4.41919e-08	1.45145e-10	0.145145	0.00241909	9.67635
55	300	209000	81000		103.21				1.0321e-07	3.38986e-10	0.338986	0.00564976	22.599
56	400	348000	90200		154.324				1.54324e-07	5.06865e-10	0.506865	0.00844776	33.791
57	500	361000	83500		172.934				1.72934e-07	5.6799e-10	0.56799	0.0094665	37.866
58	800	409000	89700		182.386				1.82386e-07	5.99033e-10	0.599033	0.00998388	39.9355
59	1200	505000	91200		221.491				2.21491e-07	7.27472e-10	0.727472	0.0121245	48.4982
60	1600	503000	89200		225.561				2.25561e-07	7.40838e-10	0.740838	0.0123473	49.3892
61	50	17200	80800		8.51485				8.51485e-09	2.79664e-11	0.0279664	0.000466107	1.86443
62	100	40400	78200		20.665				2.0665e-08	6.78726e-11	0.0678726	0.00113121	4.52484
63	150	68600	77400		35.4522				3.54522e-08	1.1644e-10	0.11644	0.00194067	7.76268
64	200	128000	77500		66.0645				6.60645e-08	2.16984e-10	0.216984	0.0036164	14.4656
64	300	320000	88000		145.455				1.45455e-07	4.77735e-10	0.477735	0.00796225	31.849
64	400	560000	93000		240.86				2.4086e-07	7.91088e-10	0.791088	0.0131848	52.7392
64	500	540000	88000		245.455				2.45455e-07	8.06178e-10	0.806178	0.0134363	53.7452
64	800	706000	98700		286.12				2.8612e-07	9.39739e-10	0.939739	0.0156623	62.6493
64	1200	735000	95800		306.889				3.06889e-07	1.00796e-09	1.00796	0.0167993	67.1971
64	1600	805000	92800		346.983				3.46983e-07	1.13964e-09	1.13964	0.018994	75.976
64	50	22700	76100		11.9317				1.19317e-08	3.91887e-11	0.0391887	0.000653145	2.61258
64	100	51400	75200		27.3404				2.73404e-08	8.97977e-11	0.0897977	0.00149663	5.98651
64	150	91500	84900		43.1095				4.31095e-08	1.4159e-10	0.14159	0.00235984	9.43935
64	200	184000	82100		89.6468				8.96468e-08	2.94438e-10	0.294438	0.00490731	19.6292
64	300	430000	86300		199.305				1.99305e-07	6.54602e-10	0.654602	0.01091	43.6402
64	400	756000	94400		320.339				3.20339e-07	1.05213e-09	1.05213	0.0175355	70.142
64	500	785000	96100		326.743				3.26743e-07	1.07316e-09	1.07316	0.0178861	71.5443
64	800	944000	93500		403.85				4.0385e-07	1.32642e-09	1.32642	0.022107	88.4278
64	1200	1110000	104000		426.923				4.26923e-07	1.4022e-09	1.4022	0.02337	93.4799
64	1600	1160000	98300		472.024				4.72024e-07	1.55033e-09	1.55033	0.0258388	103.355

## Sheet: conversion before graphs
50	0.884339			mut17	50	100	150	200	300	400	500	800	1200	1600
100	2.75899			15	0.884339	2.75899	5.12961	9.67979	11.9979	28.0439	27.957	36.3597	42.137	45.0562
150	5.12961			30	1.63137	5.3064	10.945	20.9174	24.4495	61.3289	59.2026	71.7908	95.9443	85.3228
200	9.67979			45	2.10203	7.96024	16.272	30.7932	41.075	103.526	94.6835	121.376	140.58	151.199
300	11.9979			60	3.23031	10.9783	22.0885	42.6799	54.0205	142.108	123.012	155.349	186.848	178.673
400	28.0439			mut19	50	100	150	200	300	400	500	800	1200	1600
500	27.957			15	0.832655	1.67861	2.57731	5.28133	9.60676	17.2119	18.2904	19.7066	21.4972	25.0389
800	36.3597			30	1.40698	3.06307	5.82274	9.67635	22.599	33.791	37.866	39.9355	48.4982	49.3892
1200	42.137			45	1.86443	4.52484	7.76268	14.4656	31.849	52.7392	53.7452	62.6493	67.1971	75.976
1600	45.0562			60	2.61258	5.98651	9.43935	19.6292	43.6402	70.142	71.5443	88.4278	93.4799	103.355
50	1.63137
100	5.3064
150	10.945
200	20.9174
300	24.4495
400	61.3289
500	59.2026
800	71.7908
1200	95.9443
1600	85.3228
50	2.10203
100	7.96024
150	16.272
200	30.7932
300	41.075
400	103.526
500	94.6835
800	121.376
1200	140.58
1600	151.199
50	3.23031
100	10.9783
150	22.0885
200	42.6799
300	54.0205
400	142.108
500	123.012
800	155.349
1200	186.848
1600	178.673
50	0.832655
100	1.67861
150	2.57731
200	5.28133
300	9.60676
400	17.2119
500	18.2904
800	19.7066
1200	21.4972
1600	25.0389
50	1.40698
100	3.06307
150	5.82274
200	9.67635
300	22.599
400	33.791
500	37.866
800	39.9355
1200	48.4982
1600	49.3892
50	1.86443
100	4.52484
150	7.76268
200	14.4656
300	31.849
400	52.7392
500	53.7452
800	62.6493
1200	67.1971
1600	75.976
50	2.61258
100	5.98651
150	9.43935
200	19.6292
300	43.6402
400	70.142
500	71.5443
800	88.4278
1200	93.4799
1600	103.355

## Sheet: PAPC Mut17 N64A
mut17	50	100	150	200	300	400	500	800	1200	1600
0	0	0	0	0	0	0	0	0	0	0
15	0.884339	2.75899	5.12961	9.67979	11.9979	28.0439	27.957	36.3597	42.137	45.0562
30	1.63137	5.3064	10.945	20.9174	24.4495	61.3289	59.2026	71.7908	95.9443	85.3228
45	2.10203	7.96024	16.272	30.7932	41.075	103.526	94.6835	121.376	140.58	151.199
60	3.23031	10.9783	22.0885	42.6799	54.0205	142.108	123.012	155.349	186.848	178.673
concentration	slope
0	0
50	0.0512
100	0.1811
150	0.3688
200	0.7098
300	0.9141
400	2.398
500	2.085
800	2.6381
1200	3.1476
1600	3.0899

## Sheet: PAPC Mut19 N65D
mut19	50	100	150	200	300	400	500	800	1200	1600
0	0	0	0	0	0	0	0	0	0	0
15	0.832655	1.67861	2.57731	5.28133	9.60676	17.2119	18.2904	19.7066	21.4972	25.0389
30	1.40698	3.06307	5.82274	9.67635	22.599	33.791	37.866	39.9355	48.4982	49.3892
45	1.86443	4.52484	7.76268	14.4656	31.849	52.7392	53.7452	62.6493	67.1971	75.976
60	2.61258	5.98651	9.43935	19.6292	43.6402	70.142	71.5443	88.4278	93.4799	103.355
concentration	slope
0	0
50	0.0417
100	0.0988
150	0.1769
200	0.323
300	0.7302
400	1.1721
500	1.1903
800	1.4653
1200	1.5511
1600	1.7177
