# Supplementary material for: Structural basis of phosphatidylcholine recognition by the C2–domain of cytosolic phospholipase A2α
Source: eLife journal article supplement (doi:10.7554/elife.44760), 2019-05-03
Supplement: supp [file 2018-08-12_kinetics 250ng Mut 17 N64A and mut19 N65D PAPC 2mM Tx100 KmB, 10 Concentrations_3.xlsx]

## Sheet: Raw Data
	Sample Name		AA	AA d8
1	1		6510	73600
2	2		21500	74900
3	3		44300	76100
4	4		50700	78500
5	5		138000	76200
6	6		147000	79300
7	7		249000	80000
8	8		328000	83900
9	9		402000	81100
10	10		419000	90500
11	11		12600	74100
12	12		39900	74000
13	13		86200	79200
14	14		106000	81300
15	15		324000	86300
16	16		367000	84100
17	17		562000	91400
18	18		785000	89800
19	19		892000	94400
20	20		1040000	113000
21	21		21200	81500
22	22		63100	78700
23	23		131000	79500
24	24		166000	78200
25	25		530000	88400
26	26		716000	92400
27	27		938000	94700
28	28		1240000	95100
29	29		1470000	101000
30	30		1660000	128000
31	31		27000	77300
32	32		89200	76900
33	33		185000	82800
34	34		244000	85500
35	35		836000	95600
36	36		1030000	90200
37	37		1320000	98000
38	38		1740000	97000
39	39		1980000	103000
40	40		2260000	119000
41	41		7490	82100
42	42		13400	77500
43	43		24800	80900
44	44		42400	83000
45	45		80800	81600
46	46		155000	90300
47	47		182000	88400
48	48		210000	86200
49	49		272000	90500
50	50		243000	93700
51	51		13400	84500
52	52		23100	81900
53	53		45000	77000
54	54		86700	77400
55	55		169000	85400
56	56		338000	88300
57	57		389000	89600
58	58		440000	87400
59	59		565000	98200
60	60		581000	99700
61	61		18700	83900
62	62		32700	80700
63	63		67100	78700
64	64		127000	81400
65	65		269000	89700
66	66		553000	89900
67	67		630000	98400
68	68		728000	97000
69	69		981000	105000
70	70		834000	100000
71	71		24500	79700
72	72		44200	82000
73	73		96000	82000
74	74		191000	83900
75	75		387000	85700
76	76		844000	97500
77	77		867000	96500
78	78		922000	95700
79	79		1320000	96100
80	80		1290000	103000

## Sheet: AA
	Sample Name	AA	AA d8		ng AA		avg		gram of AA	mol AA	nmol AA	nmol AA/min	nmol AA/min/mg cpla2					19	N65D
1	50	6510	73600		3.53804				3.53804e-09	1.16205e-11	0.0116205	0.000193674	0.774697					20	A94Y
2	100	21500	74900		11.482				1.1482e-08	3.77117e-11	0.0377117	0.000628529	2.51412					21	A94F
3	150	44300	76100		23.2852				2.32852e-08	7.64784e-11	0.0764784	0.00127464	5.09856					22	Y96A
4	200	50700	78500		25.8344				2.58344e-08	8.48512e-11	0.0848512	0.00141419	5.65675
5	300	138000	76200		72.4409				7.24409e-08	2.37927e-10	0.237927	0.00396545	15.8618
6	400	147000	79300		74.1488				7.41488e-08	2.43536e-10	0.243536	0.00405894	16.2358
7	500	249000	80000		124.5				1.245e-07	4.08911e-10	0.408911	0.00681519	27.2608
8	800	328000	83900		156.377				1.56377e-07	5.13608e-10	0.513608	0.00856013	34.2405
9	1200	402000	81100		198.274				1.98274e-07	6.51216e-10	0.651216	0.0108536	43.4144
10	1600	419000	90500		185.193				1.85193e-07	6.08255e-10	0.608255	0.0101376	40.5503
11	50	12600	74100		6.80162				6.80162e-09	2.23394e-11	0.0223394	0.000372324	1.4893
12	100	39900	74000		21.5676				2.15676e-08	7.08372e-11	0.0708372	0.00118062	4.72248
13	150	86200	79200		43.5354				4.35354e-08	1.42989e-10	0.142989	0.00238315	9.53259
14	200	106000	81300		52.1525				5.21525e-08	1.71291e-10	0.171291	0.00285485	11.4194
15	300	324000	86300		150.174				1.50174e-07	4.93235e-10	0.493235	0.00822059	32.8824
16	400	367000	84100		174.554				1.74554e-07	5.73311e-10	0.573311	0.00955518	38.2207
17	500	562000	91400		245.952				2.45952e-07	8.07811e-10	0.807811	0.0134635	53.8541
18	800	785000	89800		349.666				3.49666e-07	1.14845e-09	1.14845	0.0191409	76.5635
19	1200	892000	94400		377.966				3.77966e-07	1.2414e-09	1.2414	0.02069	82.7602
20	1600	1040000	113000		368.142				3.68142e-07	1.20914e-09	1.20914	0.0201523	80.609
21	50	21200	81500		10.4049				1.04049e-08	3.41742e-11	0.0341742	0.00056957	2.27828
22	100	63100	78700		32.0712				3.20712e-08	1.05335e-10	0.105335	0.00175559	7.02236
23	150	131000	79500		65.9119				6.59119e-08	2.16483e-10	0.216483	0.00360805	14.4322
24	200	166000	78200		84.9105				8.49105e-08	2.78882e-10	0.278882	0.00464804	18.5922
25	300	530000	88400		239.819				2.39819e-07	7.87669e-10	0.787669	0.0131278	52.5112
26	400	716000	92400		309.957				3.09957e-07	1.01803e-09	1.01803	0.0169672	67.8687
27	500	938000	94700		396.199				3.96199e-07	1.30129e-09	1.30129	0.0216881	86.7524
28	800	1240000	95100		521.556				5.21556e-07	1.71301e-09	1.71301	0.0285502	114.201
29	1200	1470000	101000		582.178				5.82178e-07	1.91212e-09	1.91212	0.0318687	127.475
30	1600	1660000	128000		518.75				5.1875e-07	1.7038e-09	1.7038	0.0283966	113.587
31	50	27000	77300		13.9715				1.39715e-08	4.58885e-11	0.0458885	0.000764809	3.05924
32	100	89200	76900		46.3979				4.63979e-08	1.52391e-10	0.152391	0.00253984	10.1594
33	150	185000	82800		89.372				8.9372e-08	2.93536e-10	0.293536	0.00489227	19.5691
34	200	244000	85500		114.152				1.14152e-07	3.74924e-10	0.374924	0.00624874	24.995
35	300	836000	95600		349.791				3.49791e-07	1.14886e-09	1.14886	0.0191477	76.5909
36	400	1030000	90200		456.763				4.56763e-07	1.5002e-09	1.5002	0.0250034	100.014
37	500	1320000	98000		538.776				5.38776e-07	1.76957e-09	1.76957	0.0294928	117.971
38	800	1740000	97000		717.526				7.17526e-07	2.35666e-09	2.35666	0.0392777	157.111
39	1200	1980000	103000		768.932				7.68932e-07	2.5255e-09	2.5255	0.0420917	168.367
40	1600	2260000	119000		759.664				7.59664e-07	2.49506e-09	2.49506	0.0415844	166.337
41	50	7490	82100		3.64921				3.64921e-09	1.19856e-11	0.0119856	0.000199759	0.799038
42	100	13400	77500		6.91613				6.91613e-09	2.27155e-11	0.0227155	0.000378592	1.51437
43	150	24800	80900		12.2621				1.22621e-08	4.02738e-11	0.0402738	0.000671231	2.68492
44	200	42400	83000		20.4337				2.04337e-08	6.71132e-11	0.0671132	0.00111855	4.47421
45	300	80800	81600		39.6078				3.96078e-08	1.30089e-10	0.130089	0.00216815	8.67261
46	400	155000	90300		68.66				6.866e-08	2.25509e-10	0.225509	0.00375848	15.0339
47	500	182000	88400		82.3529				8.23529e-08	2.70482e-10	0.270482	0.00450804	18.0322
48	800	210000	86200		97.4478				9.74478e-08	3.2006e-10	0.32006	0.00533434	21.3374
49	1200	272000	90500		120.221				1.20221e-07	3.94857e-10	0.394857	0.00658096	26.3238
50	1600	243000	93700		103.735				1.03735e-07	3.40711e-10	0.340711	0.00567852	22.7141
51	50	13400	84500		6.3432				6.3432e-09	2.08338e-11	0.0208338	0.00034723	1.38892
52	100	23100	81900		11.2821				1.12821e-08	3.70551e-11	0.0370551	0.000617585	2.47034
53	150	45000	77000		23.3766				2.33766e-08	7.67789e-11	0.0767789	0.00127965	5.11859
54	200	86700	77400		44.8062				4.48062e-08	1.47163e-10	0.147163	0.00245271	9.81085
55	300	169000	85400		79.1569				7.91569e-08	2.59985e-10	0.259985	0.00433309	17.3324
56	400	338000	88300		153.114				1.53114e-07	5.02893e-10	0.502893	0.00838156	33.5262
57	500	389000	89600		173.661				1.73661e-07	5.70376e-10	0.570376	0.00950627	38.0251
58	800	440000	87400		201.373				2.01373e-07	6.61395e-10	0.661395	0.0110233	44.093
59	1200	565000	98200		230.143				2.30143e-07	7.55887e-10	0.755887	0.0125981	50.3925
60	1600	581000	99700		233.099				2.33099e-07	7.65598e-10	0.765598	0.01276	51.0399
61	50	18700	83900		8.91538				8.91538e-09	2.92819e-11	0.0292819	0.000488032	1.95213
62	100	32700	80700		16.2082				1.62082e-08	5.32346e-11	0.0532346	0.000887244	3.54897
63	150	67100	78700		34.1042				3.41042e-08	1.12013e-10	0.112013	0.00186688	7.46752
64	200	127000	81400		62.4079				6.24079e-08	2.04974e-10	0.204974	0.00341624	13.6649
64	300	269000	89700		119.955				1.19955e-07	3.93985e-10	0.393985	0.00656642	26.2657
64	400	553000	89900		246.051				2.46051e-07	8.08138e-10	0.808138	0.013469	53.8758
64	500	630000	98400		256.098				2.56098e-07	8.41134e-10	0.841134	0.0140189	56.0756
64	800	728000	97000		300.206				3.00206e-07	9.86006e-10	0.986006	0.0164334	65.7337
64	1200	981000	105000		373.714				3.73714e-07	1.22744e-09	1.22744	0.0204573	81.8292
64	1600	834000	100000		333.6				3.336e-07	1.09569e-09	1.09569	0.0182614	73.0457
64	50	24500	79700		12.2961				1.22961e-08	4.03857e-11	0.0403857	0.000673095	2.69238
64	100	44200	82000		21.561				2.1561e-08	7.08155e-11	0.0708155	0.00118026	4.72103
64	150	96000	82000		46.8293				4.68293e-08	1.53807e-10	0.153807	0.00256346	10.2538
64	200	191000	83900		91.0608				9.10608e-08	2.99083e-10	0.299083	0.00498471	19.9388
64	300	387000	85700		180.63				1.8063e-07	5.93267e-10	0.593267	0.00988778	39.5511
64	400	844000	97500		346.256				3.46256e-07	1.13725e-09	1.13725	0.0189542	75.817
64	500	867000	96500		359.378				3.59378e-07	1.18035e-09	1.18035	0.0196725	78.6902
64	800	922000	95700		385.371				3.85371e-07	1.26572e-09	1.26572	0.0210954	84.3816
64	1200	1320000	96100		549.428				5.49428e-07	1.80456e-09	1.80456	0.0300759	120.304
64	1600	1290000	103000		500.971				5.00971e-07	1.6454e-09	1.6454	0.0274234	109.694

## Sheet: conversion before graphs
50	0.774697			mut17	50	100	150	200	300	400	500	800	1200	1600
100	2.51412			15	0.774697	2.51412	5.09856	5.65675	15.8618	16.2358	27.2608	34.2405	43.4144	40.5503
150	5.09856			30	1.4893	4.72248	9.53259	11.4194	32.8824	38.2207	53.8541	76.5635	82.7602	80.609
200	5.65675			45	2.27828	7.02236	14.4322	18.5922	52.5112	67.8687	86.7524	114.201	127.475	113.587
300	15.8618			60	3.05924	10.1594	19.5691	24.995	76.5909	100.014	117.971	157.111	168.367	166.337
400	16.2358			mut19	50	100	150	200	300	400	500	800	1200	1600
500	27.2608			15	0.799038	1.51437	2.68492	4.47421	8.67261	15.0339	18.0322	21.3374	26.3238	22.7141
800	34.2405			30	1.38892	2.47034	5.11859	9.81085	17.3324	33.5262	38.0251	44.093	50.3925	51.0399
1200	43.4144			45	1.95213	3.54897	7.46752	13.6649	26.2657	53.8758	56.0756	65.7337	81.8292	73.0457
1600	40.5503			60	2.69238	4.72103	10.2538	19.9388	39.5511	75.817	78.6902	84.3816	120.304	109.694
50	1.4893
100	4.72248
150	9.53259
200	11.4194
300	32.8824
400	38.2207
500	53.8541
800	76.5635
1200	82.7602
1600	80.609
50	2.27828
100	7.02236
150	14.4322
200	18.5922
300	52.5112
400	67.8687
500	86.7524
800	114.201
1200	127.475
1600	113.587
50	3.05924
100	10.1594
150	19.5691
200	24.995
300	76.5909
400	100.014
500	117.971
800	157.111
1200	168.367
1600	166.337
50	0.799038
100	1.51437
150	2.68492
200	4.47421
300	8.67261
400	15.0339
500	18.0322
800	21.3374
1200	26.3238
1600	22.7141
50	1.38892
100	2.47034
150	5.11859
200	9.81085
300	17.3324
400	33.5262
500	38.0251
800	44.093
1200	50.3925
1600	51.0399
50	1.95213
100	3.54897
150	7.46752
200	13.6649
300	26.2657
400	53.8758
500	56.0756
800	65.7337
1200	81.8292
1600	73.0457
50	2.69238
100	4.72103
150	10.2538
200	19.9388
300	39.5511
400	75.817
500	78.6902
800	84.3816
1200	120.304
1600	109.694

## Sheet: PAPC Mut17 N64A
mut17	50	100	150	200	300	400	500	800	1200	1600
0	0	0	0	0	0	0	0	0	0	0
15	0.774697	2.51412	5.09856	5.65675	15.8618	16.2358	27.2608	34.2405	43.4144	40.5503
30	1.4893	4.72248	9.53259	11.4194	32.8824	38.2207	53.8541	76.5635	82.7602	80.609
45	2.27828	7.02236	14.4322	18.5922	52.5112	67.8687	86.7524	114.201	127.475	113.587
60	3.05924	10.1594	19.5691	24.995	76.5909	100.014	117.971	157.111	168.367	166.337
concentration	slope
0	0
50	0.0508
100	0.1655
150	0.3231
200	0.4195
300	1.2655
400	1.6777
500	1.9696
800	2.6279
1200	2.8053
1600	2.7047

## Sheet: PAPC Mut19 N65D
mut19	50	100	150	200	300	400	500	800	1200	1600
0	0	0	0	0	0	0	0	0	0	0
15	0.799038	1.51437	2.68492	4.47421	8.67261	15.0339	18.0322	21.3374	26.3238	22.7141
30	1.38892	2.47034	5.11859	9.81085	17.3324	33.5262	38.0251	44.093	50.3925	51.0399
45	1.95213	3.54897	7.46752	13.6649	26.2657	53.8758	56.0756	65.7337	81.8292	73.0457
60	2.69238	4.72103	10.2538	19.9388	39.5511	75.817	78.6902	84.3816	120.304	109.694
concentration	slope
0	0
50	0.0436
100	0.0765
150	0.1656
200	0.3271
300	0.6446
400	1.2698
500	1.3028
800	1.4211
1200	1.9741
1600	1.7981
