# Supplementary material for: Structural basis of phosphatidylcholine recognition by the C2–domain of cytosolic phospholipase A2α
Source: eLife journal article supplement (doi:10.7554/elife.44760), 2019-05-03
Supplement: supp [file 2018-08-13_kinetics 250ng Mut 17 N64A and mut19 N65D PAPC 2mM Tx100 KmB, 10 Concentrations_4.xlsx]

## Sheet: Raw Data
	Sample Name		AA	AA d8
1	1		13000	80500
2	2		34900	81000
3	3		64500	83900
4	4		80200	84600
5	5		277000	94300
6	6		374000	96400
7	7		403000	92800
8	8		502000	101000
9	9		619000	101000
10	10		619000	104000
11	11		28200	89100
12	12		71700	85400
13	13		141000	90200
14	14		181000	92100
15	15		619000	106000
16	16		865000	101000
17	17		955000	106000
18	18		1190000	106000
19	19		1410000	108000
20	20		1430000	109000
21	21		41700	88200
22	22		113000	89000
23	23		229000	92900
24	24		276000	95100
25	25		1010000	101000
26	26		1360000	107000
27	27		1490000	105000
28	28		1860000	108000
29	29		2230000	110000
30	30		2220000	117000
31	31		57000	87000
32	32		153000	90200
33	33		317000	92300
34	34		370000	94800
35	35		1390000	107000
36	36		1940000	107000
37	37		2010000	108000
38	38		2560000	111000
39	39		2820000	113000
40	40		3020000	121000
41	41		8370	87700
42	42		15500	84000
43	43		26900	85400
44	44		42100	84300
45	45		94000	87900
46	46		172000	90700
47	47		217000	92400
48	48		238000	92000
49	49		281000	96000
50	50		286000	98400
51	51		14000	79800
52	52		29800	80200
53	53		48500	81100
54	54		84100	85700
55	55		198000	88700
56	56		361000	96400
57	57		464000	97500
58	58		499000	100000
59	59		620000	103000
60	60		597000	109000
61	61		19800	82700
62	62		39100	82300
63	63		71200	83600
64	64		123000	88600
65	65		310000	95600
66	66		568000	96900
67	67		712000	102000
68	68		766000	104000
69	69		968000	107000
70	70		945000	109000
71	71		25500	84700
72	72		55100	83700
73	73		97500	91400
74	74		164000	93300
75	75		424000	95500
76	76		783000	102000
77	77		994000	104000
78	78		1060000	99500
79	79		1390000	109000
80	80		1310000	110000

## Sheet: AA
	Sample Name	AA	AA d8		ng AA		avg		gram of AA	mol AA	nmol AA	nmol AA/min	nmol AA/min/mg cpla2					19	N65D
1	50	13000	80500		6.45963				6.45963e-09	2.12162e-11	0.0212162	0.000353603	1.41441					20	A94Y
2	100	34900	81000		17.2346				1.72346e-08	5.66057e-11	0.0566057	0.000943429	3.77371					21	A94F
3	150	64500	83900		30.7509				3.07509e-08	1.00999e-10	0.100999	0.00168332	6.73328					22	Y96A
4	200	80200	84600		37.9196				3.79196e-08	1.24544e-10	0.124544	0.00207574	8.30295
5	300	277000	94300		117.497				1.17497e-07	3.85912e-10	0.385912	0.00643186	25.7274
6	400	374000	96400		155.187				1.55187e-07	5.097e-10	0.5097	0.008495	33.98
7	500	403000	92800		173.707				1.73707e-07	5.70528e-10	0.570528	0.0095088	38.0352
8	800	502000	101000		198.812				1.98812e-07	6.52984e-10	0.652984	0.0108831	43.5322
9	1200	619000	101000		245.149				2.45149e-07	8.05173e-10	0.805173	0.0134195	53.6782
10	1600	619000	104000		238.077				2.38077e-07	7.81947e-10	0.781947	0.0130324	52.1298
11	50	28200	89100		12.6599				1.26599e-08	4.15807e-11	0.0415807	0.000693011	2.77204
12	100	71700	85400		33.5831				3.35831e-08	1.10301e-10	0.110301	0.00183836	7.35343
13	150	141000	90200		62.5277				6.25277e-08	2.05368e-10	0.205368	0.0034228	13.6912
14	200	181000	92100		78.6102				7.86102e-08	2.5819e-10	0.25819	0.00430316	17.2126
15	300	619000	106000		233.585				2.33585e-07	7.67193e-10	0.767193	0.0127866	51.1462
16	400	865000	101000		342.574				3.42574e-07	1.12516e-09	1.12516	0.0187527	75.0107
17	500	955000	106000		360.377				3.60377e-07	1.18363e-09	1.18363	0.0197272	78.9089
18	800	1190000	106000		449.057				4.49057e-07	1.47489e-09	1.47489	0.0245816	98.3263
19	1200	1410000	108000		522.222				5.22222e-07	1.7152e-09	1.7152	0.0285867	114.347
20	1600	1430000	109000		524.771				5.24771e-07	1.72357e-09	1.72357	0.0287262	114.905
21	50	41700	88200		18.9116				1.89116e-08	6.21137e-11	0.0621137	0.00103523	4.14091
22	100	113000	89000		50.7865				5.07865e-08	1.66805e-10	0.166805	0.00278008	11.1203
23	150	229000	92900		98.6006				9.86006e-08	3.23847e-10	0.323847	0.00539745	21.5898
24	200	276000	95100		116.088				1.16088e-07	3.81284e-10	0.381284	0.00635473	25.4189
25	300	1010000	101000		400				4e-07	1.31377e-09	1.31377	0.0218962	87.5848
26	400	1360000	107000		508.411				5.08411e-07	1.66984e-09	1.66984	0.0278307	111.323
27	500	1490000	105000		567.619				5.67619e-07	1.8643e-09	1.8643	0.0310717	124.287
28	800	1860000	108000		688.889				6.88889e-07	2.26261e-09	2.26261	0.0377101	150.84
29	1200	2230000	110000		810.909				8.10909e-07	2.66337e-09	2.66337	0.0443896	177.558
30	1600	2220000	117000		758.974				7.58974e-07	2.4928e-09	2.4928	0.0415466	166.187
31	50	57000	87000		26.2069				2.62069e-08	8.60747e-11	0.0860747	0.00143458	5.73831
32	100	153000	90200		67.8492				6.78492e-08	2.22846e-10	0.222846	0.0037141	14.8564
33	150	317000	92300		137.378				1.37378e-07	4.51209e-10	0.451209	0.00752015	30.0806
34	200	370000	94800		156.118				1.56118e-07	5.12759e-10	0.512759	0.00854598	34.1839
35	300	1390000	107000		519.626				5.19626e-07	1.70668e-09	1.70668	0.0284446	113.778
36	400	1940000	107000		725.234				7.25234e-07	2.38198e-09	2.38198	0.0396996	158.799
37	500	2010000	108000		744.444				7.44444e-07	2.44508e-09	2.44508	0.0407513	163.005
38	800	2560000	111000		922.523				9.22523e-07	3.02996e-09	3.02996	0.0504993	201.997
39	1200	2820000	113000		998.23				9.9823e-07	3.27862e-09	3.27862	0.0546436	218.574
40	1600	3020000	121000		998.347				9.98347e-07	3.279e-09	3.279	0.05465	218.6
41	50	8370	87700		3.81756				3.81756e-09	1.25385e-11	0.0125385	0.000208975	0.8359
42	100	15500	84000		7.38095				7.38095e-09	2.42422e-11	0.0242422	0.000404037	1.61615
43	150	26900	85400		12.5995				1.25995e-08	4.13823e-11	0.0413823	0.000689705	2.75882
44	200	42100	84300		19.9763				1.99763e-08	6.56107e-11	0.0656107	0.00109351	4.37404
45	300	94000	87900		42.7759				4.27759e-08	1.40494e-10	0.140494	0.00234157	9.36629
46	400	172000	90700		75.8545				7.58545e-08	2.49139e-10	0.249139	0.00415231	16.6092
47	500	217000	92400		93.9394				9.39394e-08	3.08537e-10	0.308537	0.00514229	20.5692
48	800	238000	92000		103.478				1.03478e-07	3.39867e-10	0.339867	0.00566445	22.6578
49	1200	281000	96000		117.083				1.17083e-07	3.84552e-10	0.384552	0.0064092	25.6368
50	1600	286000	98400		116.26				1.1626e-07	3.81848e-10	0.381848	0.00636414	25.4566
51	50	14000	79800		7.01754				7.01754e-09	2.30486e-11	0.0230486	0.000384144	1.53658
52	100	29800	80200		14.8628				1.48628e-08	4.8816e-11	0.048816	0.000813599	3.2544
53	150	48500	81100		23.9211				2.39211e-08	7.85671e-11	0.0785671	0.00130945	5.23781
54	200	84100	85700		39.2532				3.92532e-08	1.28924e-10	0.128924	0.00214874	8.59496
55	300	198000	88700		89.2897				8.92897e-08	2.93266e-10	0.293266	0.00488776	19.5511
56	400	361000	96400		149.793				1.49793e-07	4.91983e-10	0.491983	0.00819972	32.7989
57	500	464000	97500		190.359				1.90359e-07	6.25221e-10	0.625221	0.0104203	41.6814
58	800	499000	100000		199.6				1.996e-07	6.55572e-10	0.655572	0.0109262	43.7048
59	1200	620000	103000		240.777				2.40777e-07	7.90814e-10	0.790814	0.0131802	52.7209
60	1600	597000	109000		219.083				2.19083e-07	7.19561e-10	0.719561	0.0119927	47.9707
61	50	19800	82700		9.57678				9.57678e-09	3.14543e-11	0.0314543	0.000524238	2.09695
62	100	39100	82300		19.0036				1.90036e-08	6.24161e-11	0.0624161	0.00104027	4.16108
63	150	71200	83600		34.067				3.4067e-08	1.11891e-10	0.111891	0.00186484	7.45937
64	200	123000	88600		55.5305				5.55305e-08	1.82386e-10	0.182386	0.00303977	12.1591
64	300	310000	95600		129.707				1.29707e-07	4.26014e-10	0.426014	0.00710023	28.4009
64	400	568000	96900		234.469				2.34469e-07	7.70095e-10	0.770095	0.0128349	51.3397
64	500	712000	102000		279.216				2.79216e-07	9.17064e-10	0.917064	0.0152844	61.1376
64	800	766000	104000		294.615				2.94615e-07	9.67643e-10	0.967643	0.0161274	64.5096
64	1200	968000	107000		361.869				3.61869e-07	1.18853e-09	1.18853	0.0198089	79.2356
64	1600	945000	109000		346.789				3.46789e-07	1.139e-09	1.139	0.0189834	75.9336
64	50	25500	84700		12.0425				1.20425e-08	3.95527e-11	0.0395527	0.000659212	2.63685
64	100	55100	83700		26.3321				2.63321e-08	8.6486e-11	0.086486	0.00144143	5.76574
64	150	97500	91400		42.6696				4.26696e-08	1.40145e-10	0.140145	0.00233575	9.34302
64	200	164000	93300		70.3108				7.03108e-08	2.30931e-10	0.230931	0.00384885	15.3954
64	300	424000	95500		177.592				1.77592e-07	5.83287e-10	0.583287	0.00972145	38.8858
64	400	783000	102000		307.059				3.07059e-07	1.00851e-09	1.00851	0.0168085	67.2342
64	500	994000	104000		382.308				3.82308e-07	1.25566e-09	1.25566	0.0209277	83.7108
64	800	1060000	99500		426.131				4.26131e-07	1.3996e-09	1.3996	0.0233266	93.3064
64	1200	1390000	109000		510.092				5.10092e-07	1.67536e-09	1.67536	0.0279227	111.691
64	1600	1310000	110000		476.364				4.76364e-07	1.56458e-09	1.56458	0.0260764	104.306

## Sheet: conversion before graphs
50	1.41441			mut17	50	100	150	200	300	400	500	800	1200	1600
100	3.77371			15	1.41441	3.77371	6.73328	8.30295	25.7274	33.98	38.0352	43.5322	53.6782	52.1298
150	6.73328			30	2.77204	7.35343	13.6912	17.2126	51.1462	75.0107	78.9089	98.3263	114.347	114.905
200	8.30295			45	4.14091	11.1203	21.5898	25.4189	87.5848	111.323	124.287	150.84	177.558	166.187
300	25.7274			60	5.73831	14.8564	30.0806	34.1839	113.778	158.799	163.005	201.997	218.574	218.6
400	33.98			mut19	50	100	150	200	300	400	500	800	1200	1600
500	38.0352			15	0.8359	1.61615	2.75882	4.37404	9.36629	16.6092	20.5692	22.6578	25.6368	25.4566
800	43.5322			30	1.53658	3.2544	5.23781	8.59496	19.5511	32.7989	41.6814	43.7048	52.7209	47.9707
1200	53.6782			45	2.09695	4.16108	7.45937	12.1591	28.4009	51.3397	61.1376	64.5096	79.2356	75.9336
1600	52.1298			60	2.63685	5.76574	9.34302	15.3954	38.8858	67.2342	83.7108	93.3064	111.691	104.306
50	2.77204
100	7.35343
150	13.6912
200	17.2126
300	51.1462
400	75.0107
500	78.9089
800	98.3263
1200	114.347
1600	114.905
50	4.14091
100	11.1203
150	21.5898
200	25.4189
300	87.5848
400	111.323
500	124.287
800	150.84
1200	177.558
1600	166.187
50	5.73831
100	14.8564
150	30.0806
200	34.1839
300	113.778
400	158.799
500	163.005
800	201.997
1200	218.574
1600	218.6
50	0.8359
100	1.61615
150	2.75882
200	4.37404
300	9.36629
400	16.6092
500	20.5692
800	22.6578
1200	25.6368
1600	25.4566
50	1.53658
100	3.2544
150	5.23781
200	8.59496
300	19.5511
400	32.7989
500	41.6814
800	43.7048
1200	52.7209
1600	47.9707
50	2.09695
100	4.16108
150	7.45937
200	12.1591
300	28.4009
400	51.3397
500	61.1376
800	64.5096
1200	79.2356
1600	75.9336
50	2.63685
100	5.76574
150	9.34302
200	15.3954
300	38.8858
400	67.2342
500	83.7108
800	93.3064
1200	111.691
1600	104.306

## Sheet: PAPC Mut17 N64A
mut17	50	100	150	200	300	400	500	800	1200	1600
0	0	0	0	0	0	0	0	0	0	0
15	1.41441	3.77371	6.73328	8.30295	25.7274	33.98	38.0352	43.5322	53.6782	52.1298
30	2.77204	7.35343	13.6912	17.2126	51.1462	75.0107	78.9089	98.3263	114.347	114.905
45	4.14091	11.1203	21.5898	25.4189	87.5848	111.323	124.287	150.84	177.558	166.187
60	5.73831	14.8564	30.0806	34.1839	113.778	158.799	163.005	201.997	218.574	218.6
concentration	slope
0	0
50	0.0947
100	0.2471
150	0.5001
200	0.5699
300	1.9294
400	2.6329
500	2.7484
800	3.4087
1200	3.7402
1600	3.675

## Sheet: PAPC Mut19 N65D
mut19	50	100	150	200	300	400	500	800	1200	1600
0	0	0	0	0	0	0	0	0	0	0
15	0.8359	1.61615	2.75882	4.37404	9.36629	16.6092	20.5692	22.6578	25.6368	25.4566
30	1.53658	3.2544	5.23781	8.59496	19.5511	32.7989	41.6814	43.7048	52.7209	47.9707
45	2.09695	4.16108	7.45937	12.1591	28.4009	51.3397	61.1376	64.5096	79.2356	75.9336
60	2.63685	5.76574	9.34302	15.3954	38.8858	67.2342	83.7108	93.3064	111.691	104.306
concentration	slope
0	0
50	0.0436
100	0.0938
150	0.1657
200	0.2572
300	0.6454
400	1.128
500	1.3866
800	1.5231
1200	1.8465
1600	1.7273
