# Supplementary material for: Structural basis of phosphatidylcholine recognition by the C2–domain of cytosolic phospholipase A2α
Source: eLife journal article supplement (doi:10.7554/elife.44760), 2019-05-03
Supplement: supp [file 2018-08-14_kinetics 250ng Mut 22 Y96A and mut23 Y96F PAPC 2mM Tx100 KmB, 10 Concentrations_2.xlsx]

## Sheet: Raw Data
	Sample Name		AA	AA d8
1	1		6020	71500
2	2		13400	71000
3	3		24500	70900
4	4		23500	71800
5	5		120000	78100
6	6		194000	82100
7	7		123000	73100
8	8		223000	78600
9	9		268000	88500
10	10		246000	80700
11	11		12800	71100
12	12		27900	76800
13	13		51400	69600
14	14		49500	69600
15	15		275000	79800
16	16		434000	78800
17	17		311000	79800
18	18		498000	81200
19	19		598000	84200
20	20		598000	90600
21	21		16800	70000
22	22		37400	68800
23	23		80700	72000
24	24		73300	72000
25	25		408000	73900
26	26		674000	84900
27	27		558000	79200
28	28		858000	83100
29	29		879000	78700
30	30		882000	81000
31	31		23400	64800
32	32		51300	66600
33	33		118000	76200
34	34		101000	67100
35	35		676000	86700
36	36		935000	76500
37	37		808000	78200
38	38		1110000	82100
39	39		1280000	86100
40	40		1240000	86700
41	41		9790	71300
42	42		36800	73000
43	43		63700	73100
44	44		110000	73600
45	45		233000	74100
46	46		360000	79200
47	47		387000	82600
48	48		402000	81600
49	49		532000	84300
50	50		539000	88000
51	51		18900	64200
52	52		75800	73200
53	53		142000	76600
54	54		249000	73200
55	55		558000	78500
56	56		856000	82900
57	57		894000	84900
58	58		1060000	88400
59	59		1120000	88900
60	60		1210000	90900
61	61		29500	70300
62	62		124000	73500
63	63		222000	72800
64	64		394000	77300
65	65		917000	82900
66	66		1300000	82700
67	67		1310000	78800
68	68		1580000	84100
69	69		1870000	92500
70	70		1860000	91600
71	71		39800	64900
72	72		183000	71500
73	73		296000	71900
74	74		577000	82700
75	75		1310000	90200
76	76		1870000	91400
77	77		1850000	83200
78	78		2140000	83300
79	79		2320000	89500
80	80		2610000	94800

## Sheet: AA
	Sample Name	AA	AA d8		ng AA		avg		gram of AA	mol AA	nmol AA	nmol AA/min	nmol AA/min/mg cpla2					19	N65D
1	50	6020	71500		3.36783				3.36783e-09	1.10614e-11	0.0110614	0.000184357	0.737427					20	A94Y
2	100	13400	71000		7.5493				7.5493e-09	2.47951e-11	0.0247951	0.000413252	1.65301					21	A94F
3	150	24500	70900		13.8223				1.38223e-08	4.53983e-11	0.0453983	0.000756639	3.02655					22	Y96A
4	200	23500	71800		13.0919				1.30919e-08	4.29995e-11	0.0429995	0.000716658	2.86663
5	300	120000	78100		61.4597				6.14597e-08	2.0186e-10	0.20186	0.00336433	13.4573
6	400	194000	82100		94.5189				9.45189e-08	3.10441e-10	0.310441	0.00517401	20.696
7	500	123000	73100		67.3051				6.73051e-08	2.21059e-10	0.221059	0.00368431	14.7372
8	800	223000	78600		113.486				1.13486e-07	3.72737e-10	0.372737	0.00621228	24.8491
9	1200	268000	88500		121.13				1.2113e-07	3.97843e-10	0.397843	0.00663071	26.5228
10	1600	246000	80700		121.933				1.21933e-07	4.00481e-10	0.400481	0.00667468	26.6987
11	50	12800	71100		7.20113				7.20113e-09	2.36516e-11	0.0236516	0.000394193	1.57677
12	100	27900	76800		14.5312				1.45312e-08	4.77269e-11	0.0477269	0.000795448	3.18179
13	150	51400	69600		29.5402				2.95402e-08	9.70228e-11	0.0970228	0.00161705	6.46819
14	200	49500	69600		28.4483				2.84483e-08	9.34364e-11	0.0934364	0.00155727	6.22909
15	300	275000	79800		137.845				1.37845e-07	4.52741e-10	0.452741	0.00754568	30.1827
16	400	434000	78800		220.305				2.20305e-07	7.23575e-10	0.723575	0.0120596	48.2383
17	500	311000	79800		155.89				1.5589e-07	5.12009e-10	0.512009	0.00853348	34.1339
18	800	498000	81200		245.32				2.4532e-07	8.05737e-10	0.805737	0.0134289	53.7158
19	1200	598000	84200		284.086				2.84086e-07	9.33059e-10	0.933059	0.015551	62.2039
20	1600	598000	90600		264.018				2.64018e-07	8.67147e-10	0.867147	0.0144525	57.8098
21	50	16800	70000		9.6				9.6e-09	3.15305e-11	0.0315305	0.000525509	2.10203
22	100	37400	68800		21.7442				2.17442e-08	7.14172e-11	0.0714172	0.00119029	4.76115
23	150	80700	72000		44.8333				4.48333e-08	1.47252e-10	0.147252	0.0024542	9.81679
24	200	73300	72000		40.7222				4.07222e-08	1.33749e-10	0.133749	0.00222915	8.91662
25	300	408000	73900		220.839				2.20839e-07	7.2533e-10	0.72533	0.0120888	48.3553
26	400	674000	84900		317.55				3.1755e-07	1.04297e-09	1.04297	0.0173828	69.5314
27	500	558000	79200		281.818				2.81818e-07	9.25612e-10	0.925612	0.0154269	61.7075
28	800	858000	83100		412.996				4.12996e-07	1.35646e-09	1.35646	0.0226076	90.4305
29	1200	879000	78700		446.76				4.4676e-07	1.46735e-09	1.46735	0.0244559	97.8234
30	1600	882000	81000		435.556				4.35556e-07	1.43055e-09	1.43055	0.0238425	95.3701
31	50	23400	64800		14.4444				1.44444e-08	4.74418e-11	0.0474418	0.000790696	3.16278
32	100	51300	66600		30.8108				3.08108e-08	1.01196e-10	0.101196	0.0016866	6.7464
33	150	118000	76200		61.9423				6.19423e-08	2.03445e-10	0.203445	0.00339075	13.563
34	200	101000	67100		60.2086				6.02086e-08	1.97751e-10	0.197751	0.00329585	13.1834
35	300	676000	86700		311.88				3.1188e-07	1.02435e-09	1.02435	0.0170725	68.2899
36	400	935000	76500		488.889				4.88889e-07	1.60572e-09	1.60572	0.026762	107.048
37	500	808000	78200		413.299				4.13299e-07	1.35745e-09	1.35745	0.0226242	90.4968
38	800	1110000	82100		540.804				5.40804e-07	1.77623e-09	1.77623	0.0296039	118.415
39	1200	1280000	86100		594.657				5.94657e-07	1.95311e-09	1.95311	0.0325518	130.207
40	1600	1240000	86700		572.088				5.72088e-07	1.87898e-09	1.87898	0.0313164	125.265
41	50	9790	71300		5.49229				5.49229e-09	1.8039e-11	0.018039	0.00030065	1.2026
42	100	36800	73000		20.1644				2.01644e-08	6.62285e-11	0.0662285	0.00110381	4.41523
43	150	63700	73100		34.8564				3.48564e-08	1.14483e-10	0.114483	0.00190805	7.63222
44	200	110000	73600		59.7826				5.97826e-08	1.96352e-10	0.196352	0.00327253	13.0901
45	300	233000	74100		125.776				1.25776e-07	4.13102e-10	0.413102	0.00688504	27.5402
46	400	360000	79200		181.818				1.81818e-07	5.97169e-10	0.597169	0.00995282	39.8113
47	500	387000	82600		187.409				1.87409e-07	6.15532e-10	0.615532	0.0102589	41.0355
48	800	402000	81600		197.059				1.97059e-07	6.47226e-10	0.647226	0.0107871	43.1484
49	1200	532000	84300		252.432				2.52432e-07	8.29094e-10	0.829094	0.0138182	55.273
50	1600	539000	88000		245				2.45e-07	8.04685e-10	0.804685	0.0134114	53.6457
51	50	18900	64200		11.7757				1.17757e-08	3.86765e-11	0.0386765	0.000644608	2.57843
52	100	75800	73200		41.4208				4.14208e-08	1.36044e-10	0.136044	0.00226739	9.06957
53	150	142000	76600		74.1514				7.41514e-08	2.43545e-10	0.243545	0.00405909	16.2363
54	200	249000	73200		136.066				1.36066e-07	4.46898e-10	0.446898	0.0074483	29.7932
55	300	558000	78500		284.331				2.84331e-07	9.33866e-10	0.933866	0.0155644	62.2577
56	400	856000	82900		413.028				4.13028e-07	1.35656e-09	1.35656	0.0226093	90.4374
57	500	894000	84900		421.201				4.21201e-07	1.38341e-09	1.38341	0.0230568	92.2271
58	800	1060000	88400		479.638				4.79638e-07	1.57534e-09	1.57534	0.0262556	105.022
59	1200	1120000	88900		503.937				5.03937e-07	1.65515e-09	1.65515	0.0275858	110.343
60	1600	1210000	90900		532.453				5.32453e-07	1.74881e-09	1.74881	0.0291468	116.587
61	50	29500	70300		16.7852				1.67852e-08	5.51298e-11	0.0551298	0.00091883	3.67532
62	100	124000	73500		67.483				6.7483e-08	2.21643e-10	0.221643	0.00369405	14.7762
63	150	222000	72800		121.978				1.21978e-07	4.00628e-10	0.400628	0.00667714	26.7085
64	200	394000	77300		203.881				2.03881e-07	6.69633e-10	0.669633	0.0111605	44.6422
64	300	917000	82900		442.461				4.42461e-07	1.45323e-09	1.45323	0.0242205	96.8821
64	400	1300000	82700		628.779				6.28779e-07	2.06518e-09	2.06518	0.0344197	137.679
64	500	1310000	78800		664.975				6.64975e-07	2.18406e-09	2.18406	0.036401	145.604
64	800	1580000	84100		751.486				7.51486e-07	2.4682e-09	2.4682	0.0411367	164.547
64	1200	1870000	92500		808.649				8.08649e-07	2.65595e-09	2.65595	0.0442658	177.063
64	1600	1860000	91600		812.227				8.12227e-07	2.6677e-09	2.6677	0.0444617	177.847
64	50	39800	64900		24.53				2.453e-08	8.05672e-11	0.0805672	0.00134279	5.37115
64	100	183000	71500		102.378				1.02378e-07	3.36252e-10	0.336252	0.0056042	22.4168
64	150	296000	71900		164.673				1.64673e-07	5.40857e-10	0.540857	0.00901429	36.0572
64	200	577000	82700		279.081				2.79081e-07	9.16622e-10	0.916622	0.015277	61.1081
64	300	1310000	90200		580.931				5.80931e-07	1.90803e-09	1.90803	0.0318005	127.202
64	400	1870000	91400		818.381				8.18381e-07	2.68791e-09	2.68791	0.0447986	179.194
64	500	1850000	83200		889.423				8.89423e-07	2.92125e-09	2.92125	0.0486875	194.75
64	800	2140000	83300		1027.61				1.02761e-06	3.37512e-09	3.37512	0.0562519	225.008
64	1200	2320000	89500		1036.87				1.03687e-06	3.40553e-09	3.40553	0.0567589	227.035
64	1600	2610000	94800		1101.27				1.10127e-06	3.61703e-09	3.61703	0.0602838	241.135

## Sheet: conversion before graphs
50	0.737427			mut22	50	100	150	200	300	400	500	800	1200	1600
100	1.65301			15	0.737427	1.65301	3.02655	2.86663	13.4573	20.696	14.7372	24.8491	26.5228	26.6987
150	3.02655			30	1.57677	3.18179	6.46819	6.22909	30.1827	48.2383	34.1339	53.7158	62.2039	57.8098
200	2.86663			45	2.10203	4.76115	9.81679	8.91662	48.3553	69.5314	61.7075	90.4305	97.8234	95.3701
300	13.4573			60	3.16278	6.7464	13.563	13.1834	68.2899	107.048	90.4968	118.415	130.207	125.265
400	20.696			mut23	50	100	150	200	300	400	500	800	1200	1600
500	14.7372			15	1.2026	4.41523	7.63222	13.0901	27.5402	39.8113	41.0355	43.1484	55.273	53.6457
800	24.8491			30	2.57843	9.06957	16.2363	29.7932	62.2577	90.4374	92.2271	105.022	110.343	116.587
1200	26.5228			45	3.67532	14.7762	26.7085	44.6422	96.8821	137.679	145.604	164.547	177.063	177.847
1600	26.6987			60	5.37115	22.4168	36.0572	61.1081	127.202	179.194	194.75	225.008	227.035	241.135
50	1.57677
100	3.18179
150	6.46819
200	6.22909
300	30.1827
400	48.2383
500	34.1339
800	53.7158
1200	62.2039
1600	57.8098
50	2.10203
100	4.76115
150	9.81679
200	8.91662
300	48.3553
400	69.5314
500	61.7075
800	90.4305
1200	97.8234
1600	95.3701
50	3.16278
100	6.7464
150	13.563
200	13.1834
300	68.2899
400	107.048
500	90.4968
800	118.415
1200	130.207
1600	125.265
50	1.2026
100	4.41523
150	7.63222
200	13.0901
300	27.5402
400	39.8113
500	41.0355
800	43.1484
1200	55.273
1600	53.6457
50	2.57843
100	9.06957
150	16.2363
200	29.7932
300	62.2577
400	90.4374
500	92.2271
800	105.022
1200	110.343
1600	116.587
50	3.67532
100	14.7762
150	26.7085
200	44.6422
300	96.8821
400	137.679
500	145.604
800	164.547
1200	177.063
1600	177.847
50	5.37115
100	22.4168
150	36.0572
200	61.1081
300	127.202
400	179.194
500	194.75
800	225.008
1200	227.035
1600	241.135

## Sheet: PAPC Mut22 Y96A
mut 22	50	100	150	200	300	400	500	800	1200	1600
0	0	0	0	0	0	0	0	0	0	0
15	0.737427	1.65301	3.02655	2.86663	13.4573	20.696	14.7372	24.8491	26.5228	26.6987
30	1.57677	3.18179	6.46819	6.22909	30.1827	48.2383	34.1339	53.7158	62.2039	57.8098
45	2.10203	4.76115	9.81679	8.91662	48.3553	69.5314	61.7075	90.4305	97.8234	95.3701
60	3.16278	6.7464	13.563	13.1834	68.2899	107.048	90.4968	118.415	130.207	125.265
concentration	slope
0	0
50	0.0513
100	0.1107
150	0.2261
200	0.2161
300	1.1432
400	1.7529
500	1.5198
800	2.0161
1200	2.2114
1600	2.128

## Sheet: PAPC Mut23 Y96F
mut23	50	100	150	200	300	400	500	800	1200	1600
0	0	0	0	0	0	0	0	0	0	0
15	1.2026	4.41523	7.63222	13.0901	27.5402	39.8113	41.0355	43.1484	55.273	53.6457
30	2.57843	9.06957	16.2363	29.7932	62.2577	90.4374	92.2271	105.022	110.343	116.587
45	3.67532	14.7762	26.7085	44.6422	96.8821	137.679	145.604	164.547	177.063	177.847
60	5.37115	22.4168	36.0572	61.1081	127.202	179.194	194.75	225.008	227.035	241.135
concentration	slope
0	0
50	0.0881
100	0.368
150	0.5915
200	1.0251
300	2.1583
400	3.0417
500	3.2938
800	3.8094
1200	3.8391
1600	4.0431
