# Supplementary material for: Structural basis of phosphatidylcholine recognition by the C2–domain of cytosolic phospholipase A2α
Source: eLife journal article supplement (doi:10.7554/elife.44760), 2019-05-03
Supplement: supp [file 2018-08-15_kinetics 250ng Mut 22 Y96A and mut23 Y96F PAPC 2mM Tx100 KmB, 10 Concentrations_3.xlsx]

## Sheet: Raw Data
	Sample Name		AA	AA d8
1	1		5920	90700
2	2		21300	89000
3	3		24400	88900
4	4		41200	92200
5	5		86500	91100
6	6		124000	89800
7	7		228000	99900
8	8		331000	103000
9	9		403000	105000
10	10		383000	106000
11	11		12200	91900
12	12		44700	89800
13	13		51900	92100
14	14		86800	92500
15	15		248000	98900
16	16		408000	99700
17	17		563000	105000
18	18		780000	109000
19	19		906000	110000
20	20		888000	114000
21	21		17200	83600
22	22		67500	87700
23	23		78100	91100
24	24		138000	90800
25	25		408000	95700
26	26		767000	104000
27	27		955000	106000
28	28		1210000	107000
29	29		1470000	116000
30	30		1520000	127000
31	31		25400	90600
32	32		87400	84800
33	33		107000	87600
34	34		186000	90700
35	35		649000	110000
36	36		1160000	109000
37	37		1410000	110000
38	38		1730000	105000
39	39		2030000	120000
40	40		2230000	136000
41	41		17200	89300
42	42		41600	88800
43	43		103000	93900
44	44		160000	95400
45	45		277000	101000
46	46		434000	98100
47	47		500000	99500
48	48		648000	109000
49	49		714000	110000
50	50		773000	109000
51	51		36000	89700
52	52		90500	96000
53	53		236000	101000
54	54		356000	100000
55	55		732000	102000
56	56		1030000	112000
57	57		1230000	110000
58	58		1460000	108000
59	59		1560000	115000
60	60		1680000	113000
61	61		53000	93900
62	62		149000	95100
63	63		359000	92900
64	64		608000	104000
65	65		1110000	104000
66	66		1660000	108000
67	67		2090000	115000
68	68		2190000	114000
69	69		2620000	109000
70	70		2710000	120000
71	71		68300	90800
72	72		198000	93000
73	73		483000	97100
74	74		868000	105000
75	75		1650000	112000
76	76		2180000	113000
77	77		2850000	115000
78	78		3250000	106000
79	79		3390000	113000
80	80		3710000	124000

## Sheet: AA
	Sample Name	AA	AA d8		ng AA		avg		gram of AA	mol AA	nmol AA	nmol AA/min	nmol AA/min/mg cpla2					19	N65D
1	50	5920	90700		2.6108				2.6108e-09	8.575e-12	0.008575	0.000142917	0.571667					20	A94Y
2	100	21300	89000		9.57303				9.57303e-09	3.1442e-11	0.031442	0.000524033	2.09613					21	A94F
3	150	24400	88900		10.9786				1.09786e-08	3.60585e-11	0.0360585	0.000600975	2.4039					22	Y96A
4	200	41200	92200		17.8742				1.78742e-08	5.87065e-11	0.0587065	0.000978442	3.91377
5	300	86500	91100		37.9802				3.79802e-08	1.24743e-10	0.124743	0.00207906	8.31623
6	400	124000	89800		55.2339				5.52339e-08	1.81412e-10	0.181412	0.00302353	12.0941
7	500	228000	99900		91.2913				9.12913e-08	2.9984e-10	0.29984	0.00499733	19.9893
8	800	331000	103000		128.544				1.28544e-07	4.22193e-10	0.422193	0.00703654	28.1462
9	1200	403000	105000		153.524				1.53524e-07	5.04238e-10	0.504238	0.00840397	33.6159
10	1600	383000	106000		144.528				1.44528e-07	4.74693e-10	0.474693	0.00791155	31.6462
11	50	12200	91900		5.31012				5.31012e-09	1.74407e-11	0.0174407	0.000290679	1.16271
12	100	44700	89800		19.9109				1.99109e-08	6.5396e-11	0.065396	0.00108993	4.35973
13	150	51900	92100		22.5407				2.25407e-08	7.40334e-11	0.0740334	0.00123389	4.93556
14	200	86800	92500		37.5351				3.75351e-08	1.23281e-10	0.123281	0.00205469	8.21877
15	300	248000	98900		100.303				1.00303e-07	3.29439e-10	0.329439	0.00549065	21.9626
16	400	408000	99700		163.691				1.63691e-07	5.37632e-10	0.537632	0.00896053	35.8421
17	500	563000	105000		214.476				2.14476e-07	7.04432e-10	0.704432	0.0117405	46.9621
18	800	780000	109000		286.239				2.86239e-07	9.4013e-10	0.94013	0.0156688	62.6753
19	1200	906000	110000		329.455				3.29455e-07	1.08207e-09	1.08207	0.0180345	72.138
20	1600	888000	114000		311.579				3.11579e-07	1.02336e-09	1.02336	0.017056	68.2239
21	50	17200	83600		8.22967				8.22967e-09	2.70298e-11	0.0270298	0.000450496	1.80198
22	100	67500	87700		30.7868				3.07868e-08	1.01117e-10	0.101117	0.00168528	6.74113
23	150	78100	91100		34.292				3.4292e-08	1.1263e-10	0.11263	0.00187716	7.50864
24	200	138000	90800		60.793				6.0793e-08	1.9967e-10	0.19967	0.00332784	13.3113
25	300	408000	95700		170.533				1.70533e-07	5.60103e-10	0.560103	0.00933505	37.3402
26	400	767000	104000		295				2.95e-07	9.68907e-10	0.968907	0.0161484	64.5938
27	500	955000	106000		360.377				3.60377e-07	1.18363e-09	1.18363	0.0197272	78.9089
28	800	1210000	107000		452.336				4.52336e-07	1.48567e-09	1.48567	0.0247611	99.0445
29	1200	1470000	116000		506.897				5.06897e-07	1.66487e-09	1.66487	0.0277478	110.991
30	1600	1520000	127000		478.74				4.7874e-07	1.57239e-09	1.57239	0.0262065	104.826
31	50	25400	90600		11.2141				1.12141e-08	3.6832e-11	0.036832	0.000613867	2.45547
32	100	87400	84800		41.2264				4.12264e-08	1.35405e-10	0.135405	0.00225675	9.02702
33	150	107000	87600		48.8584				4.88584e-08	1.60472e-10	0.160472	0.00267454	10.6981
34	200	186000	90700		82.0287				8.20287e-08	2.69417e-10	0.269417	0.00449029	17.9612
35	300	649000	110000		236				2.36e-07	7.75125e-10	0.775125	0.0129188	51.675
36	400	1160000	109000		425.688				4.25688e-07	1.39814e-09	1.39814	0.0233024	93.2095
37	500	1410000	110000		512.727				5.12727e-07	1.68402e-09	1.68402	0.0280669	112.268
38	800	1730000	105000		659.048				6.59048e-07	2.1646e-09	2.1646	0.0360766	144.306
39	1200	2030000	120000		676.667				6.76667e-07	2.22246e-09	2.22246	0.0370411	148.164
40	1600	2230000	136000		655.882				6.55882e-07	2.1542e-09	2.1542	0.0359033	143.613
41	50	17200	89300		7.70437				7.70437e-09	2.53044e-11	0.0253044	0.000421741	1.68696
42	100	41600	88800		18.7387				1.87387e-08	6.15461e-11	0.0615461	0.00102577	4.10307
43	150	103000	93900		43.8765				4.38765e-08	1.44109e-10	0.144109	0.00240182	9.60728
44	200	160000	95400		67.086				6.7086e-08	2.20339e-10	0.220339	0.00367232	14.6893
45	300	277000	101000		109.703				1.09703e-07	3.60312e-10	0.360312	0.00600519	24.0208
46	400	434000	98100		176.962				1.76962e-07	5.8122e-10	0.58122	0.009687	38.748
47	500	500000	99500		201.005				2.01005e-07	6.60187e-10	0.660187	0.0110031	44.0125
48	800	648000	109000		237.798				2.37798e-07	7.81031e-10	0.781031	0.0130172	52.0688
49	1200	714000	110000		259.636				2.59636e-07	8.52757e-10	0.852757	0.0142126	56.8505
50	1600	773000	109000		283.67				2.8367e-07	9.31693e-10	0.931693	0.0155282	62.1129
51	50	36000	89700		16.0535				1.60535e-08	5.27266e-11	0.0527266	0.000878777	3.51511
52	100	90500	96000		37.7083				3.77083e-08	1.2385e-10	0.12385	0.00206417	8.25669
53	150	236000	101000		93.4653				9.34653e-08	3.0698e-10	0.30698	0.00511634	20.4654
54	200	356000	100000		142.4				1.424e-07	4.67703e-10	0.467703	0.00779505	31.1802
55	300	732000	102000		287.059				2.87059e-07	9.42824e-10	0.942824	0.0157137	62.855
56	400	1030000	112000		367.857				3.67857e-07	1.2082e-09	1.2082	0.0201367	80.5467
57	500	1230000	110000		447.273				4.47273e-07	1.46904e-09	1.46904	0.0244839	97.9357
58	800	1460000	108000		540.741				5.40741e-07	1.77602e-09	1.77602	0.0296004	118.402
59	1200	1560000	115000		542.609				5.42609e-07	1.78216e-09	1.78216	0.0297027	118.811
60	1600	1680000	113000		594.69				5.9469e-07	1.95322e-09	1.95322	0.0325536	130.215
61	50	53000	93900		22.5772				2.25772e-08	7.41532e-11	0.0741532	0.00123589	4.94355
62	100	149000	95100		62.6709				6.26709e-08	2.05838e-10	0.205838	0.00343063	13.7225
63	150	359000	92900		154.575				1.54575e-07	5.0769e-10	0.50769	0.0084615	33.846
64	200	608000	104000		233.846				2.33846e-07	7.68051e-10	0.768051	0.0128009	51.2034
64	300	1110000	104000		426.923				4.26923e-07	1.4022e-09	1.4022	0.02337	93.4799
64	400	1660000	108000		614.815				6.14815e-07	2.01932e-09	2.01932	0.0336553	134.621
64	500	2090000	115000		726.957				7.26957e-07	2.38764e-09	2.38764	0.039794	159.176
64	800	2190000	114000		768.421				7.68421e-07	2.52382e-09	2.52382	0.0420637	168.255
64	1200	2620000	109000		961.468				9.61468e-07	3.15787e-09	3.15787	0.0526312	210.525
64	1600	2710000	120000		903.333				9.03333e-07	2.96693e-09	2.96693	0.0494489	197.796
64	50	68300	90800		30.0881				3.00881e-08	9.88223e-11	0.0988223	0.00164704	6.58815
64	100	198000	93000		85.1613				8.51613e-08	2.79706e-10	0.279706	0.00466177	18.6471
64	150	483000	97100		198.97				1.9897e-07	6.53503e-10	0.653503	0.0108917	43.5669
64	200	868000	105000		330.667				3.30667e-07	1.08605e-09	1.08605	0.0181009	72.4034
64	300	1650000	112000		589.286				5.89286e-07	1.93547e-09	1.93547	0.0322578	129.031
64	400	2180000	113000		771.681				7.71681e-07	2.53453e-09	2.53453	0.0422422	168.969
64	500	2850000	115000		991.304				9.91304e-07	3.25587e-09	3.25587	0.0542645	217.058
64	800	3250000	106000		1226.42				1.22642e-06	4.02807e-09	4.02807	0.0671346	268.538
64	1200	3390000	113000		1200				1.2e-06	3.94132e-09	3.94132	0.0656886	262.754
64	1600	3710000	124000		1196.77				1.19677e-06	3.93072e-09	3.93072	0.065512	262.048

## Sheet: conversion before graphs
50	0.571667			mut22	50	100	150	200	300	400	500	800	1200	1600
100	2.09613			15	0.571667	2.09613	2.4039	3.91377	8.31623	12.0941	19.9893	28.1462	33.6159	31.6462
150	2.4039			30	1.16271	4.35973	4.93556	8.21877	21.9626	35.8421	46.9621	62.6753	72.138	68.2239
200	3.91377			45	1.80198	6.74113	7.50864	13.3113	37.3402	64.5938	78.9089	99.0445	110.991	104.826
300	8.31623			60	2.45547	9.02702	10.6981	17.9612	51.675	93.2095	112.268	144.306	148.164	143.613
400	12.0941			mut23	50	100	150	200	300	400	500	800	1200	1600
500	19.9893			15	1.68696	4.10307	9.60728	14.6893	24.0208	38.748	44.0125	52.0688	56.8505	62.1129
800	28.1462			30	3.51511	8.25669	20.4654	31.1802	62.855	80.5467	97.9357	118.402	118.811	130.215
1200	33.6159			45	4.94355	13.7225	33.846	51.2034	93.4799	134.621	159.176	168.255	210.525	197.796
1600	31.6462			60	6.58815	18.6471	43.5669	72.4034	129.031	168.969	217.058	268.538	262.754	262.048
50	1.16271
100	4.35973
150	4.93556
200	8.21877
300	21.9626
400	35.8421
500	46.9621
800	62.6753
1200	72.138
1600	68.2239
50	1.80198
100	6.74113
150	7.50864
200	13.3113
300	37.3402
400	64.5938
500	78.9089
800	99.0445
1200	110.991
1600	104.826
50	2.45547
100	9.02702
150	10.6981
200	17.9612
300	51.675
400	93.2095
500	112.268
800	144.306
1200	148.164
1600	143.613
50	1.68696
100	4.10307
150	9.60728
200	14.6893
300	24.0208
400	38.748
500	44.0125
800	52.0688
1200	56.8505
1600	62.1129
50	3.51511
100	8.25669
150	20.4654
200	31.1802
300	62.855
400	80.5467
500	97.9357
800	118.402
1200	118.811
1600	130.215
50	4.94355
100	13.7225
150	33.846
200	51.2034
300	93.4799
400	134.621
500	159.176
800	168.255
1200	210.525
1600	197.796
50	6.58815
100	18.6471
150	43.5669
200	72.4034
300	129.031
400	168.969
500	217.058
800	268.538
1200	262.754
1600	262.048

## Sheet: PAPC Mut22 Y96A
mut22	50	100	150	200	300	400	500	800	1200	1600
0	0	0	0	0	0	0	0	0	0	0
15	0.571667	2.09613	2.4039	3.91377	8.31623	12.0941	19.9893	28.1462	33.6159	31.6462
30	1.16271	4.35973	4.93556	8.21877	21.9626	35.8421	46.9621	62.6753	72.138	68.2239
45	1.80198	6.74113	7.50864	13.3113	37.3402	64.5938	78.9089	99.0445	110.991	104.826
60	2.45547	9.02702	10.6981	17.9612	51.675	93.2095	112.268	144.306	148.164	143.613
concentration	slope
0	0
50	0.0409
100	0.1513
150	0.176
200	0.3021
300	0.8825
400	1.5928
500	1.8897
800	2.3967
1200	2.4914
1600	2.4027

## Sheet: PAPC Mut23 Y96F
mut 23	50	100	150	200	300	400	500	800	1200	1600
0	0	0	0	0	0	0	0	0	0	0
15	1.68696	4.10307	9.60728	14.6893	24.0208	38.748	44.0125	52.0688	56.8505	62.1129
30	3.51511	8.25669	20.4654	31.1802	62.855	80.5467	97.9357	118.402	118.811	130.215
45	4.94355	13.7225	33.846	51.2034	93.4799	134.621	159.176	168.255	210.525	197.796
60	6.58815	18.6471	43.5669	72.4034	129.031	168.969	217.058	268.538	262.754	262.048
concentration	slope
0	0
50	0.1096
100	0.3128
150	0.7493
200	1.2088
300	2.1835
400	2.8921
500	3.6619
800	4.3551
1200	4.5279
1600	4.3985
