# Supplementary material for: Structural basis of phosphatidylcholine recognition by the C2–domain of cytosolic phospholipase A2α
Source: eLife journal article supplement (doi:10.7554/elife.44760), 2019-05-03
Supplement: supp [file 2018-08-16_kinetics 250ng Mut 22 Y96A and mut23 Y96F PAPC 2mM Tx100 KmB, 10 Concentrations_4.xlsx]

## Sheet: Raw Data
	Sample Name		AA	AA d8
1	1		5630	82800
2	2		16200	81700
3	3		21700	79200
4	4		34900	77700
5	5		78600	84100
6	6		215000	86800
7	7		205000	88200
8	8		277000	95400
9	9		354000	98700
10	10		302000	100000
11	11		9940	80600
12	12		29200	79800
13	13	VIAL BROKE IN BATH	624	325
14	14		65800	77600
15	15		171000	83200
16	16		490000	94900
17	17		500000	95600
18	18		624000	100000
19	19		769000	98200
20	20		761000	118000
21	21		15100	77500
22	22		45600	78800
23	23		64000	80500
24	24		112000	81700
25	25		289000	84900
26	26		828000	97300
27	27		837000	92000
28	28		964000	96500
29	29		1310000	112000
30	30		1370000	133000
31	31		19800	79600
32	32		63600	78700
33	33		88300	78800
34	34		152000	80100
35	35		389000	86000
36	36		1130000	96100
37	37		1120000	92800
38	38		1410000	94900
39	39		1890000	106000
40	40		1950000	121000
41	41		13000	85900
42	42		48200	86400
43	43		102000	88700
44	44		166000	90100
45	45		324000	95900
46	46		440000	94800
47	47		553000	98300
48	48		620000	97600
49	49		694000	95100
50	50		766000	103000
51	51		26500	81500
52	52		96400	81400
53	53		242000	93100
54	54		420000	88500
55	55		713000	91600
56	56		1050000	99000
57	57		1170000	98400
58	58		1350000	100000
59	59		1570000	106000
60	60		1590000	106000
61	61		35900	80700
62	62		158000	81800
63	63		356000	86300
64	64		662000	90500
65	65		1150000	98200
66	66		1590000	99200
67	67		1870000	101000
68	68		2120000	98000
69	69		2440000	105000
70	70		2530000	105000
71	71		52000	80100
72	72		220000	84900
73	73		492000	86200
74	74		930000	95200
75	75		1530000	91300
76	76		2210000	97500
77	77		2350000	97200
78	78		2800000	105000
79	79		3290000	104000
80	80		3300000	102000

## Sheet: AA
	Sample Name	AA	AA d8		ng AA		avg		gram of AA	mol AA	nmol AA	nmol AA/min	nmol AA/min/mg cpla2					19	N65D
1	50	5630	82800		2.71981				2.71981e-09	8.93301e-12	0.00893301	0.000148884	0.595534					20	A94Y
2	100	16200	81700		7.93146				7.93146e-09	2.60503e-11	0.0260503	0.000434172	1.73669					21	A94F
3	150	21700	79200		10.9596				1.09596e-08	3.5996e-11	0.035996	0.000599934	2.39973					22	Y96A
4	200	34900	77700		17.9665				1.79665e-08	5.90098e-11	0.0590098	0.000983497	3.93399
5	300	78600	84100		37.3841				3.73841e-08	1.22785e-10	0.122785	0.00204642	8.18569
6	400	215000	86800		99.0783				9.90783e-08	3.25416e-10	0.325416	0.0054236	21.6944
7	500	205000	88200		92.9705				9.29705e-08	3.05355e-10	0.305355	0.00508925	20.357
8	800	277000	95400		116.143				1.16143e-07	3.81462e-10	0.381462	0.0063577	25.4308
9	1200	354000	98700		143.465				1.43465e-07	4.71201e-10	0.471201	0.00785335	31.4134
10	1600	302000	100000		120.8				1.208e-07	3.96759e-10	0.396759	0.00661265	26.4506
11	50	9940	80600		4.933				4.933e-09	1.62021e-11	0.0162021	0.000270035	1.08014
12	100	29200	79800		14.6366				1.46366e-08	4.80728e-11	0.0480728	0.000801214	3.20486
13	VIAL BROKE IN BATH												VIAL BROKE IN BATH
14	200	65800	77600		33.9175				3.39175e-08	1.114e-10	0.1114	0.00185666	7.42665
15	300	171000	83200		82.2115				8.22115e-08	2.70018e-10	0.270018	0.0045003	18.0012
16	400	490000	94900		206.533				2.06533e-07	6.78344e-10	0.678344	0.0113057	45.2229
17	500	500000	95600		209.205				2.09205e-07	6.87119e-10	0.687119	0.011452	45.8079
18	800	624000	100000		249.6				2.496e-07	8.19794e-10	0.819794	0.0136632	54.6529
19	1200	769000	98200		313.238				3.13238e-07	1.02881e-09	1.02881	0.0171468	68.5873
20	1600	761000	118000		257.966				2.57966e-07	8.47271e-10	0.847271	0.0141212	56.4848
21	50	15100	77500		7.79355				7.79355e-09	2.55974e-11	0.0255974	0.000426623	1.70649
22	100	45600	78800		23.1472				2.31472e-08	7.60254e-11	0.0760254	0.00126709	5.06836
23	150	64000	80500		31.8012				3.18012e-08	1.04449e-10	0.104449	0.00174082	6.96326
24	200	112000	81700		54.8348				5.48348e-08	1.80101e-10	0.180101	0.00300168	12.0067
25	300	289000	84900		136.16				1.3616e-07	4.47209e-10	0.447209	0.00745348	29.8139
26	400	828000	97300		340.391				3.40391e-07	1.11799e-09	1.11799	0.0186331	74.5326
27	500	837000	92000		363.913				3.63913e-07	1.19525e-09	1.19525	0.0199208	79.6831
28	800	964000	96500		399.585				3.99585e-07	1.31241e-09	1.31241	0.0218735	87.494
29	1200	1310000	112000		467.857				4.67857e-07	1.53664e-09	1.53664	0.0256107	102.443
30	1600	1370000	133000		412.03				4.1203e-07	1.35328e-09	1.35328	0.0225547	90.2189
31	50	19800	79600		9.94975				9.94975e-09	3.26792e-11	0.0326792	0.000544654	2.17862
32	100	63600	78700		32.3253				3.23253e-08	1.0617e-10	0.10617	0.0017695	7.07801
33	150	88300	78800		44.8223				4.48223e-08	1.47216e-10	0.147216	0.0024536	9.81439
34	200	152000	80100		75.9051				7.59051e-08	2.49305e-10	0.249305	0.00415508	16.6203
35	300	389000	86000		180.93				1.8093e-07	5.94253e-10	0.594253	0.00990421	39.6168
36	400	1130000	96100		470.343				4.70343e-07	1.54481e-09	1.54481	0.0257468	102.987
37	500	1120000	92800		482.759				4.82759e-07	1.58559e-09	1.58559	0.0264264	105.706
38	800	1410000	94900		594.31				5.9431e-07	1.95197e-09	1.95197	0.0325328	130.131
39	1200	1890000	106000		713.208				7.13208e-07	2.34248e-09	2.34248	0.0390413	156.165
40	1600	1950000	121000		644.628				6.44628e-07	2.11724e-09	2.11724	0.0352873	141.149
41	50	13000	85900		6.05355				6.05355e-09	1.98825e-11	0.0198825	0.000331374	1.3255
42	100	48200	86400		22.3148				2.23148e-08	7.32914e-11	0.0732914	0.00122152	4.8861
43	150	102000	88700		45.9977				4.59977e-08	1.51076e-10	0.151076	0.00251794	10.0718
44	200	166000	90100		73.6959				7.36959e-08	2.42049e-10	0.242049	0.00403415	16.1366
45	300	324000	95900		135.141				1.35141e-07	4.4386e-10	0.44386	0.00739767	29.5907
46	400	440000	94800		185.654				1.85654e-07	6.09767e-10	0.609767	0.0101628	40.6512
47	500	553000	98300		225.025				2.25025e-07	7.3908e-10	0.73908	0.012318	49.272
48	800	620000	97600		254.098				2.54098e-07	8.34568e-10	0.834568	0.0139095	55.6379
49	1200	694000	95100		291.903				2.91903e-07	9.58736e-10	0.958736	0.0159789	63.9157
50	1600	766000	103000		297.476				2.97476e-07	9.77038e-10	0.977038	0.016284	65.1359
51	50	26500	81500		13.0061				1.30061e-08	4.27177e-11	0.0427177	0.000711962	2.84785
52	100	96400	81400		47.371				4.7371e-08	1.55587e-10	0.155587	0.00259311	10.3724
53	150	242000	93100		103.974				1.03974e-07	3.41496e-10	0.341496	0.0056916	22.7664
54	200	420000	88500		189.831				1.89831e-07	6.23485e-10	0.623485	0.0103914	41.5657
55	300	713000	91600		311.354				3.11354e-07	1.02262e-09	1.02262	0.0170437	68.1746
56	400	1050000	99000		424.242				4.24242e-07	1.39339e-09	1.39339	0.0232232	92.8929
57	500	1170000	98400		475.61				4.7561e-07	1.56211e-09	1.56211	0.0260351	104.14
58	800	1350000	100000		540				5.4e-07	1.77359e-09	1.77359	0.0295599	118.239
59	1200	1570000	106000		592.453				5.92453e-07	1.94587e-09	1.94587	0.0324312	129.725
60	1600	1590000	106000		600				6e-07	1.97066e-09	1.97066	0.0328443	131.377
61	50	35900	80700		17.7943				1.77943e-08	5.84441e-11	0.0584441	0.000974069	3.89627
62	100	158000	81800		77.2616				7.72616e-08	2.5376e-10	0.25376	0.00422934	16.9174
63	150	356000	86300		165.006				1.65006e-07	5.4195e-10	0.54195	0.0090325	36.13
64	200	662000	90500		292.597				2.92597e-07	9.61013e-10	0.961013	0.0160169	64.0675
64	300	1150000	98200		468.432				4.68432e-07	1.53853e-09	1.53853	0.0256422	102.569
64	400	1590000	99200		641.129				6.41129e-07	2.10574e-09	2.10574	0.0350957	140.383
64	500	1870000	101000		740.594				7.40594e-07	2.43243e-09	2.43243	0.0405405	162.162
64	800	2120000	98000		865.306				8.65306e-07	2.84204e-09	2.84204	0.0473673	189.469
64	1200	2440000	105000		929.524				9.29524e-07	3.05296e-09	3.05296	0.0508826	203.53
64	1600	2530000	105000		963.81				9.6381e-07	3.16556e-09	3.16556	0.0527594	211.038
64	50	52000	80100		25.9675				2.59675e-08	8.52886e-11	0.0852886	0.00142148	5.6859
64	100	220000	84900		103.651				1.03651e-07	3.40436e-10	0.340436	0.00567393	22.6957
64	150	492000	86200		228.306				2.28306e-07	7.49856e-10	0.749856	0.0124976	49.9904
64	200	930000	95200		390.756				3.90756e-07	1.28341e-09	1.28341	0.0213902	85.5608
64	300	1530000	91300		670.318				6.70318e-07	2.20161e-09	2.20161	0.0366935	146.774
64	400	2210000	97500		906.667				9.06667e-07	2.97788e-09	2.97788	0.0496314	198.526
64	500	2350000	97200		967.078				9.67078e-07	3.1763e-09	3.1763	0.0529383	211.753
64	800	2800000	105000		1066.67				1.06667e-06	3.50339e-09	3.50339	0.0583899	233.559
64	1200	3290000	104000		1265.38				1.26538e-06	4.15607e-09	4.15607	0.0692678	277.071
64	1600	3300000	102000		1294.12				1.29412e-06	4.25044e-09	4.25044	0.0708406	283.363

## Sheet: conversion before graphs
50	0.595534			mut22	50	100	150	200	300	400	500	800	1200	1600
100	1.73669			15	0.595534	1.73669	2.39973	3.93399	8.18569	21.6944	20.357	25.4308	31.4134	26.4506
150	2.39973			30	1.08014	3.20486	VIAL BROKE IN BATH	7.42665	18.0012	45.2229	45.8079	54.6529	68.5873	56.4848
200	3.93399			45	1.70649	5.06836	6.96326	12.0067	29.8139	74.5326	79.6831	87.494	102.443	90.2189
300	8.18569			60	2.17862	7.07801	9.81439	16.6203	39.6168	102.987	105.706	130.131	156.165	141.149
400	21.6944			mut23	50	100	150	200	300	400	500	800	1200	1600
500	20.357			15	1.3255	4.8861	10.0718	16.1366	29.5907	40.6512	49.272	55.6379	63.9157	65.1359
800	25.4308			30	2.84785	10.3724	22.7664	41.5657	68.1746	92.8929	104.14	118.239	129.725	131.377
1200	31.4134			45	3.89627	16.9174	36.13	64.0675	102.569	140.383	162.162	189.469	203.53	211.038
1600	26.4506			60	5.6859	22.6957	49.9904	85.5608	146.774	198.526	211.753	233.559	277.071	283.363
50	1.08014
100	3.20486
150	VIAL BROKE IN BATH
200	7.42665
300	18.0012
400	45.2229
500	45.8079
800	54.6529
1200	68.5873
1600	56.4848
50	1.70649
100	5.06836
150	6.96326
200	12.0067
300	29.8139
400	74.5326
500	79.6831
800	87.494
1200	102.443
1600	90.2189
50	2.17862
100	7.07801
150	9.81439
200	16.6203
300	39.6168
400	102.987
500	105.706
800	130.131
1200	156.165
1600	141.149
50	1.3255
100	4.8861
150	10.0718
200	16.1366
300	29.5907
400	40.6512
500	49.272
800	55.6379
1200	63.9157
1600	65.1359
50	2.84785
100	10.3724
150	22.7664
200	41.5657
300	68.1746
400	92.8929
500	104.14
800	118.239
1200	129.725
1600	131.377
50	3.89627
100	16.9174
150	36.13
200	64.0675
300	102.569
400	140.383
500	162.162
800	189.469
1200	203.53
1600	211.038
50	5.6859
100	22.6957
150	49.9904
200	85.5608
300	146.774
400	198.526
500	211.753
800	233.559
1200	277.071
1600	283.363

## Sheet: PAPC Mut22 Y96A
mut22	50	100	150	200	300	400	500	800	1200	1600
0	0	0	0	0	0	0	0	0	0	0
15	0.595534	1.73669	2.39973	3.93399	8.18569	21.6944	20.357	25.4308	31.4134	26.4506
30	1.08014	3.20486		7.42665	18.0012	45.2229	45.8079	54.6529	68.5873	56.4848
45	1.70649	5.06836	6.96326	12.0067	29.8139	74.5326	79.6831	87.494	102.443	90.2189
60	2.17862	7.07801	9.81439	16.6203	39.6168	102.987	105.706	130.131	156.165	141.149
			VIAL BROKE IN BATH
concentration	slope
0	0
50	0.0365
100	0.1166
150	0.1613
200	0.2754
300	0.6724
400	1.7254
500	1.8049
800	2.1488
1200	2.5557
1600	2.3071

## Sheet: PAPC Mut23 Y96F
mut23	50	100	150	200	300	400	500	800	1200	1600
0	0	0	0	0	0	0	0	0	0	0
15	1.3255	4.8861	10.0718	16.1366	29.5907	40.6512	49.272	55.6379	63.9157	65.1359
30	2.84785	10.3724	22.7664	41.5657	68.1746	92.8929	104.14	118.239	129.725	131.377
45	3.89627	16.9174	36.13	64.0675	102.569	140.383	162.162	189.469	203.53	211.038
60	5.6859	22.6957	49.9904	85.5608	146.774	198.526	211.753	233.559	277.071	283.363
concentration	slope
0	0
50	0.093
100	0.3828
150	0.8072
200	1.4603
300	2.4435
400	3.3119
500	3.576
800	4.0063
1200	4.625
1600	4.7508
