# Supplementary material for: Structural basis of phosphatidylcholine recognition by the C2–domain of cytosolic phospholipase A2α
Source: eLife journal article supplement (doi:10.7554/elife.44760), 2019-05-03
Supplement: supp [file elife-44760-supp-v1.zip]

Archive with 10 entries (10 files):
- elife_poa_e44760_Figure_4_figure_supplement_2.pdf
- elife_poa_e44760_Figure_4_source_data_1.pdf
- elife_poa_e44760_Figure_6_figure_supplement_1.pdf
- elife_poa_e44760_Figure_3_source_data_2.zip
- elife_poa_e44760_Figure_1_figure_supplement_2.pdf
- elife_poa_e44760_Figure_2_figure_supplement_1.pdf
- elife_poa_e44760_Transparent_Reporting_File.doc
- elife_poa_e44760_Figure_3_source_data_1.pdf
- elife_poa_e44760_Figure_1_figure_supplement_1.pdf
- elife_poa_e44760_Figure_4_figure_supplement_1.pdf
