# Supplementary material for: Structural basis of phosphatidylcholine recognition by the C2–domain of cytosolic phospholipase A2α
Source: eLife journal article supplement (doi:10.7554/elife.44760), 2019-05-03
Supplement: supp [file elife-44760-supp-v1.zip › elife_poa_e44760_Figure_1_figure_supplement_1.pdf]

Figure 1, supplement 1

cPLA2 $\alpha$  (GIVA) sequences

|       |             |                                                            |             |                                                                                                                                                                                                                                                                                                                                                                                                                         |             |             |             |              |     |
|-------|-------------|------------------------------------------------------------|-------------|-------------------------------------------------------------------------------------------------------------------------------------------------------------------------------------------------------------------------------------------------------------------------------------------------------------------------------------------------------------------------------------------------------------------------|-------------|-------------|-------------|--------------|-----|
| HUMAN | MSFIDPYQHI  | IVEHQYSHKF                                                 | TVVVLRA TKV | TKGAFGDMLD                                                                                                                                                                                                                                                                                                                                                                                                              | TPDPYVELFI  | STTPDSRKRT  | RHFNNNDINPV | WNETFEFILD   | 80  |
| MOUSE | MSFIDPYQHI  | IVEHQYSHKF                                                 | TVVVLRA TKV | TKGTFGDMLD                                                                                                                                                                                                                                                                                                                                                                                                              | TPDPYVELFI  | STTPDSRKRT  | RHFNNNDINPV | WNETFEFILD   | 80  |
| CHICK | MSFIDPYQHI  | VVEHQYSHVF                                                 | TVTVRKATNV  | TKGAIGDMLD                                                                                                                                                                                                                                                                                                                                                                                                              | TPDPYVELFI  | PSAPDCRKR   | KHFNNNDVNPV | WNETFEFILD   | 80  |
|       | *****       | :***** *                                                   | **.* :*: *  | ***:.****                                                                                                                                                                                                                                                                                                                                                                                                               | *****       | ..*:.****   | :***:***    | *****        |     |
| HUMAN | PNQENVLEIT  | LM <span style="background-color: yellow;">DANYVMDE</span> | TLGTATFTVS  | SMKVGEKKEV                                                                                                                                                                                                                                                                                                                                                                                                              | PFIFNQVTEM  | VLEMSLEVCS  | CPDLRFSMAL  | CDQEKTFRQQ   | 160 |
| MOUSE | PNQENVLEIT  | LM <span style="background-color: yellow;">DANYVMDE</span> | TLGTATFPVS  | SMKVGEKKEV                                                                                                                                                                                                                                                                                                                                                                                                              | PFIFNQVTEM  | ILEMSLEVCS  | CPDLRFSMAL  | CDQEKTFRQQ   | 160 |
| CHICK | PNQDNVLEVT  | LM <span style="background-color: yellow;">DANYVMDE</span> | TLGMATFPIS  | SLKLGEKKEV                                                                                                                                                                                                                                                                                                                                                                                                              | QLTFNNVTEM  | TLELSLEVCS  | STDLRFSMAL  | CDEEKKFRQQ   | 160 |
|       | ***:****:*  | ** <span style="background-color: yellow;">DANYVMDE</span> | *** **.*:   | *:~:*****                                                                                                                                                                                                                                                                                                                                                                                                               | : **~:****  | **~:*****   | ..*****     | **~:***.**** |     |
| HUMAN | RKEHIRESMK  | KLLGPKNSEG                                                 | LHSARDVPV   | AILGSGGGFR                                                                                                                                                                                                                                                                                                                                                                                                              | AMVGFSGVMK  | ALYESGILDC  | ATYVAGLSGS  | TWYMSTLYSH   | 240 |
| MOUSE | RKENIKENMK  | KLLGPKKSEG                                                 | LYSTRDVPV   | AILGSGGGFR                                                                                                                                                                                                                                                                                                                                                                                                              | AMVGFSGVMK  | ALYESGILDC  | ATYIAGLSGS  | TWYMSTLYSH   | 240 |
| CHICK | RKDNIMQSMK  | SFLGEENSKN                                                 | LTTSRDVPVI  | AVLGSGGGFR                                                                                                                                                                                                                                                                                                                                                                                                              | AMVGFAGVMK  | ALYESGVLD   | ATYIAGLSGS  | TWYMSTLYSH   | 240 |
|       | **~:~* :~** | ~**~* :~**~                                                | * :~:*****  | *:***** <span style="background-color: yellow;">GGFR</span>                                                                                                                                                                                                                                                                                                                                                             | *****~:**** | *****~:***  | ***~:*****  | *****        |     |
| HUMAN | PDFPEKGPEE  | INEELMKNVS                                                 | HNPLLLLTPO  | KVKRYVESLW                                                                                                                                                                                                                                                                                                                                                                                                              | KKKSSGQPV   | FTDIFGMLIG  | ETLIHNRMT   | TLSSLKEKVN   | 320 |
| MOUSE | PDFPEKGPEE  | INEELMKNVS                                                 | HNPLLLLTPO  | KVKRYVESLW                                                                                                                                                                                                                                                                                                                                                                                                              | KKKSSGQPV   | FTDIFGMLIG  | ETLIQNRMS   | TLSSLKEKVN   | 320 |
| CHICK | PDFPEKGPEE  | INQELMNSVS                                                 | HNPLLLLTPO  | KVKRYIEALW                                                                                                                                                                                                                                                                                                                                                                                                              | NKKSSGQPV   | FTDIFGMLIG  | ETLIHNRMD   | TLSDMKEKVS   | 320 |
|       | *****~:*    | **~:***~:~*                                                | *****~:***  | *****~:~*~*                                                                                                                                                                                                                                                                                                                                                                                                             | *****~:***  | *****~:***  | *****~:***  | ***~:~*~*~*  |     |
| HUMAN | TAQCPLPLFT  | CLHVKPDVSE                                                 | LMFADWVEFS  | PYEIGMAKYG                                                                                                                                                                                                                                                                                                                                                                                                              | TFMAPDLFGS  | KFFMGTVVKK  | YEENPLHFLM  | GVWGSAFSIL   | 400 |
| MOUSE | AARCPLPLFT  | CLHVKPDVSE                                                 | LMFADWVEFS  | PYEIGMAKYG                                                                                                                                                                                                                                                                                                                                                                                                              | TFMAPDLFGS  | KFFMGTVVKK  | YEENPLHFLM  | GVWGSAFSIL   | 400 |
| CHICK | EAQCALPLFT  | CLHVKPDVSE                                                 | LMFADWVEFS  | PYEIGMAKYG                                                                                                                                                                                                                                                                                                                                                                                                              | TFMSPDLFGS  | KFFMGTVVKK  | YSENPLHFLM  | GVWGSAFSIL   | 400 |
|       | *~:~*~*~*~* | *****~:***                                                 | *****~:***  | *****~:***                                                                                                                                                                                                                                                                                                                                                                                                              | ***~:*****  | *****~:***  | *~:*****~*  | *****~:***   |     |
| HUMAN | FNRVLGVSGS  | QSRGSTMEEE                                                 | LENITTKHIV  | SNDSSDSDDE                                                                                                                                                                                                                                                                                                                                                                                                              | SHEPKGTENE  | DAGSDYQSDN  | QASWIHRMIM  | ALVSDSALFN   | 480 |
| MOUSE | FNRVLGVSGS  | QNKGSTMEEE                                                 | LENITAKHIV  | SNDSSDSDDE                                                                                                                                                                                                                                                                                                                                                                                                              | AQGPKGTENE  | EAEKEYQSDN  | QASWVHRMLM  | ALVSDSALFN   | 480 |
| CHICK | FNRVLGVSNS  | QNKGPSTMEEE                                                | LENIRLKLHV  | SNDSSDSEDE                                                                                                                                                                                                                                                                                                                                                                                                              | SQHPKGTENS  | EANEYQNSS   | QESWVQRMLM  | ALVGDSALFN   | 480 |
|       | *****~:*    | *~:~*~*~*~*                                                | ****~*~:*   | *****~:~*~*                                                                                                                                                                                                                                                                                                                                                                                                             | :: *****    | :*~:~*~*~*  | *~:~*~*~*   | ***~:*****   |     |
| HUMAN | TREGRAGKVH  | NFMLGLNLNT                                                 | SYPLSPLSDF  | ATQDSFDDDE                                                                                                                                                                                                                                                                                                                                                                                                              | LDAAVADPDE  | FERIYEPLDV  | KSKKIHVVD   | GLTFNLPYPL   | 560 |
| MOUSE | TREGRAGKVH  | NFMLGLNLNT                                                 | SYPLSPLRDF  | SSQDSFD-DE                                                                                                                                                                                                                                                                                                                                                                                                              | LDAAVADPDE  | FERIYEPLDV  | KSKKIHVVD   | GLTFNLPYPL   | 560 |
| CHICK | TREGRAGKVH  | NFMLGLNLNS                                                 | CYPLSPLADL  | LTQESVEEDE                                                                                                                                                                                                                                                                                                                                                                                                              | LDAAVADPDE  | FERIYEPLDV  | KSKKIHVVD   | GLTFNLPYPL   | 560 |
|       | *****~:***  | *****~:~*~*                                                | ~*~*~*~*~*  | :~*~:~*~*~*                                                                                                                                                                                                                                                                                                                                                                                                             | *****~:***  | *****~:***  | *****~:~*~* | *****~:***   |     |
| HUMAN | ILRPQRGVDL  | IISFDFSA                                                   | SDSSPPFKEL  | LLAEKWAKMN                                                                                                                                                                                                                                                                                                                                                                                                              | KLPFPKIDPY  | VFDREGLKEC  | YVFKPKNPDM  | EKDCPTIIHF   | 640 |
| MOUSE | ILRPQRGVDL  | IISFDFSA                                                   | SDTSPPFKEI  | LLAEKWAKMN                                                                                                                                                                                                                                                                                                                                                                                                              | KLPFPKIDPY  | VFDREGLKEC  | YVFKPKNPV   | EKDCPTIIHF   | 640 |
| CHICK | ILRPQRGVDL  | IISFDFSA                                                   | SDSSPPFKEL  | LLAEKWAKMN                                                                                                                                                                                                                                                                                                                                                                                                              | KLPFPKIDPN  | VFDREGLKEC  | YVFKPKDTSS  | EKDCPTIIHF   | 640 |
|       | *****~:***  | *****~:~*~*                                                | **~:*****~* | *****~:***                                                                                                                                                                                                                                                                                                                                                                                                              | *****~:***  | *****~:***  | *****~:~*~* | *****~:***   |     |
| HUMAN | VLANINFRKY  | RAPGVPRETE                                                 | EEKEIADF    | FDDPESPFST                                                                                                                                                                                                                                                                                                                                                                                                              | FNFQYPNQAF  | KRLHDLMHFN  | TLNNIDVIKE  | AMVESIEYRR   | 720 |
| MOUSE | VLANINFRKY  | KAPGLPRETE                                                 | EEKEIADF    | FDDPESPFST                                                                                                                                                                                                                                                                                                                                                                                                              | FNFQYPNQAF  | KRLHDLMYFN  | TLNNIDVIK   | AIVESIEYRR   | 720 |
| CHICK | VLANINFRKY  | KAPGLPRETE                                                 | EEKDFADF    | FDDPNTPFST                                                                                                                                                                                                                                                                                                                                                                                                              | FNFQYPNEAF  | KRLHDLMEFN  | TLNNLDVIK   | AMMESIEYRK   | 720 |
|       | *****~:***  | :***~:~*~*                                                 | ***~:~*~*   | *****~:~*~*                                                                                                                                                                                                                                                                                                                                                                                                             | *****~:~*~* | *****~:~*~* | *****~:~*~* | *~:~*~*~*    |     |
| HUMAN | QNPSRCSVSL  | SNVEARRFFN                                                 | KEFLSKPKA   | In C2-Domain, Ca <sup>2+</sup> binding residues are cyan, DHPC binding residues are yellow, C1P binding residues are beige, and membrane interaction residues are burgundy.<br>In Catalytic Domain, active site residues are orange, PAPC polar headgroup interacting residues are blue, PAPC acyl chain interacting residues are lavender, PIP2 interacting residues are magenta, and phosphorylation sites are green. |             |             |             |              |     |
| MOUSE | QNPSRCSVSL  | SNVEARKFFN                                                 | KEFLSKPTV   |                                                                                                                                                                                                                                                                                                                                                                                                                         |             |             |             |              |     |
| CHICK | ENPSRCSVSL  | SSVEARRFFN                                                 | KNNLNNH-T   |                                                                                                                                                                                                                                                                                                                                                                                                                         |             |             |             |              |     |
|       | :*****~*~*  | *~:*****~*                                                 | *~:~*~*~*   |                                                                                                                                                                                                                                                                                                                                                                                                                         |             |             |             |              |     |
