# Supplementary material for: Structural basis of phosphatidylcholine recognition by the C2–domain of cytosolic phospholipase A2α
Source: eLife journal article supplement (doi:10.7554/elife.44760), 2019-05-03
Supplement: supp [file elife-44760-supp-v1.zip › elife_poa_e44760_Figure_1_figure_supplement_2.pdf]

Figure 1, supplement 2

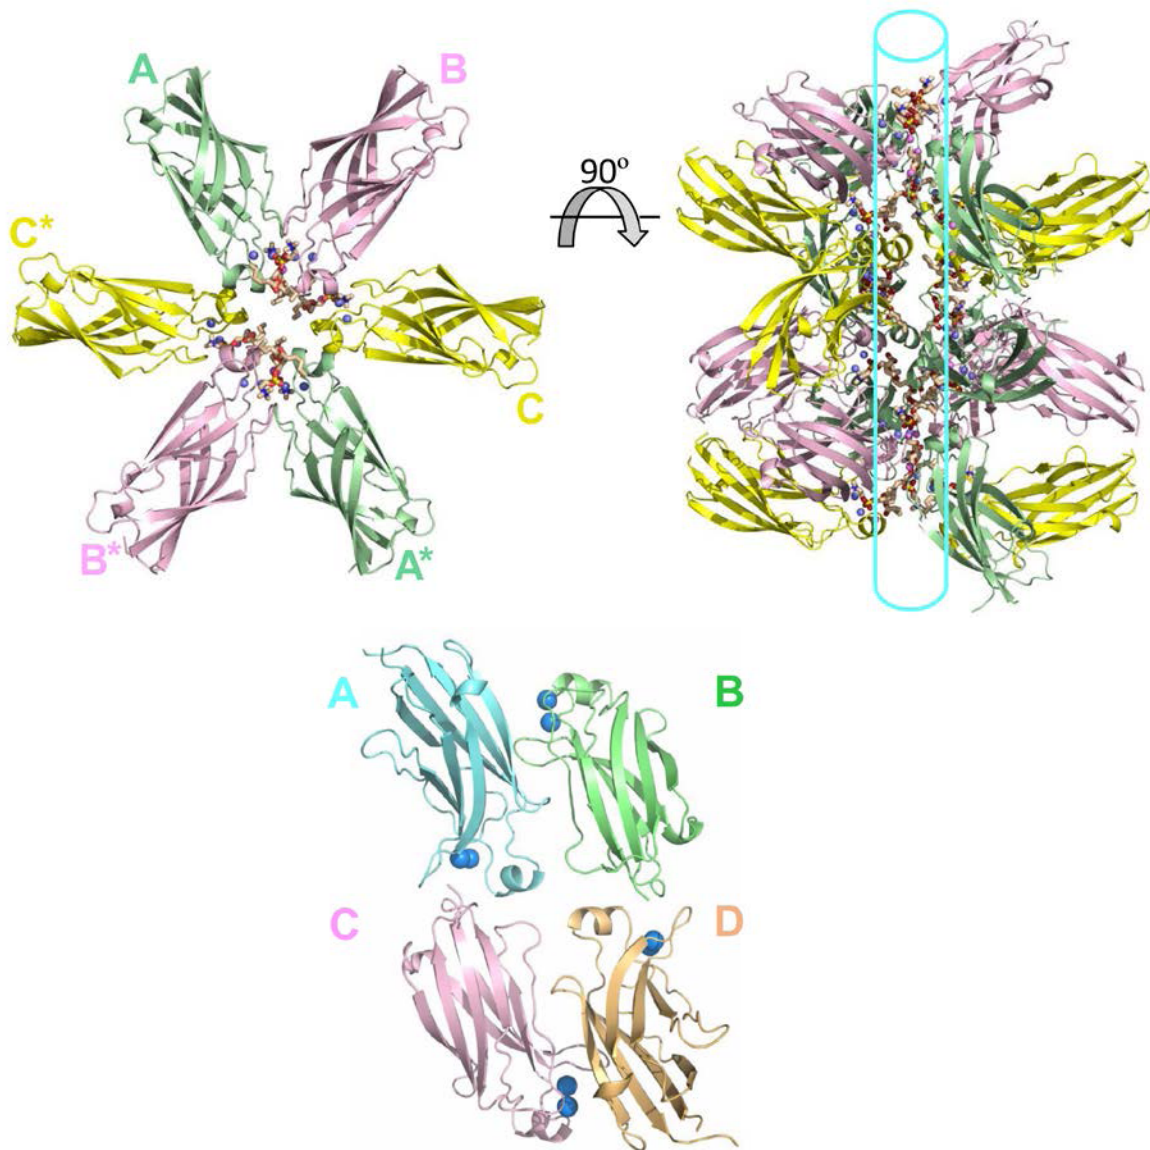

**Figure 1-S2.** Tubular topology formed in the crystal lattice of the cPLA<sub>2</sub> C2-domain/DHPC structural complex. **(Upper Left panel)** Cross-sectional view of three complexes of cPLA<sub>2</sub> C2-PC in the asymmetric unit (labeled A, B, C) and three complexes in the neighboring asymmetric unit (A\*, B\* and C\*) that together form a ring-like structure. The hexanoyl acyl chains associated in one complex are separated from hexanoyl acyl chains in adjacent complexes by 4.9 to 7.2 Å. **(Upper Right panel)** Rotation by 90° reveals PC lipids packed into a ring-like topology that forms a tubular-like scaffold. **(Lower panel)** The crystal packing lattice of lipid-free human cPLA2α C2-domain (PDB: 1RLW). The incorporated Ca<sup>2+</sup> is shown in blue spheres. Protomer A packs with protomers B and C, but not with protomer D.
