# Supplementary material for: Structural basis of phosphatidylcholine recognition by the C2–domain of cytosolic phospholipase A2α
Source: eLife journal article supplement (doi:10.7554/elife.44760), 2019-05-03

Figure S2, supplement 1

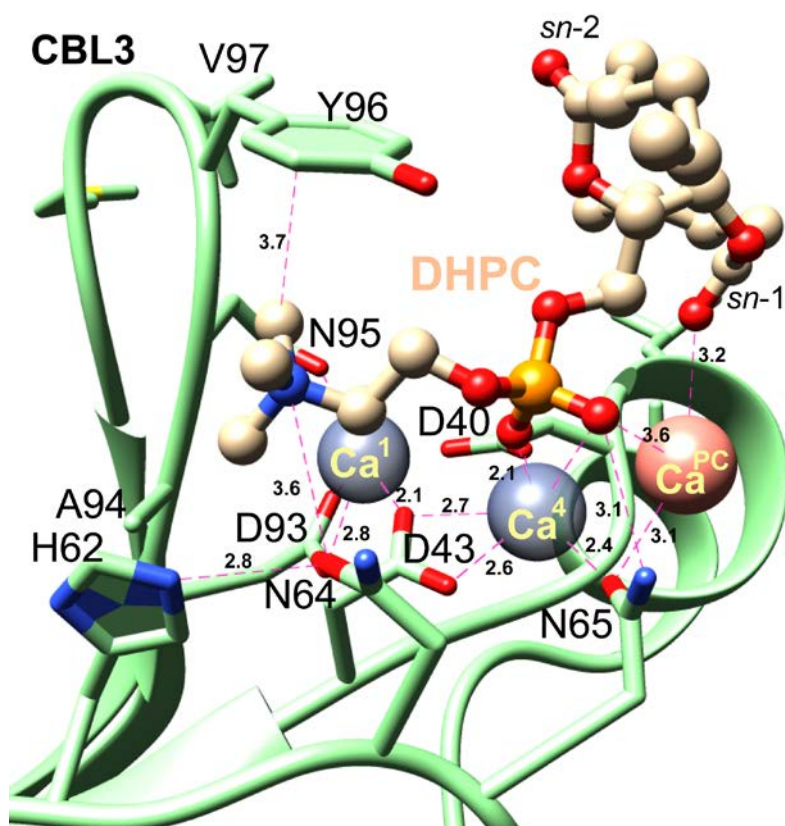

**Figure 2-S1. Zoomed views of the cPLA2α C2-Domain complexed w/ Ca<sup>2+</sup> and DHPC**

C2-domain and DHPC are shown in lime green and beige, respectively. Nitrogen, oxygen, and phosphorus atoms are blue, red, and orange, respectively. Numeric labels for dashed lines equal distances in Ångströms. Lower structure provides a 'backside' view (relative to the upper structure) by rotation 180° in the xy plane.

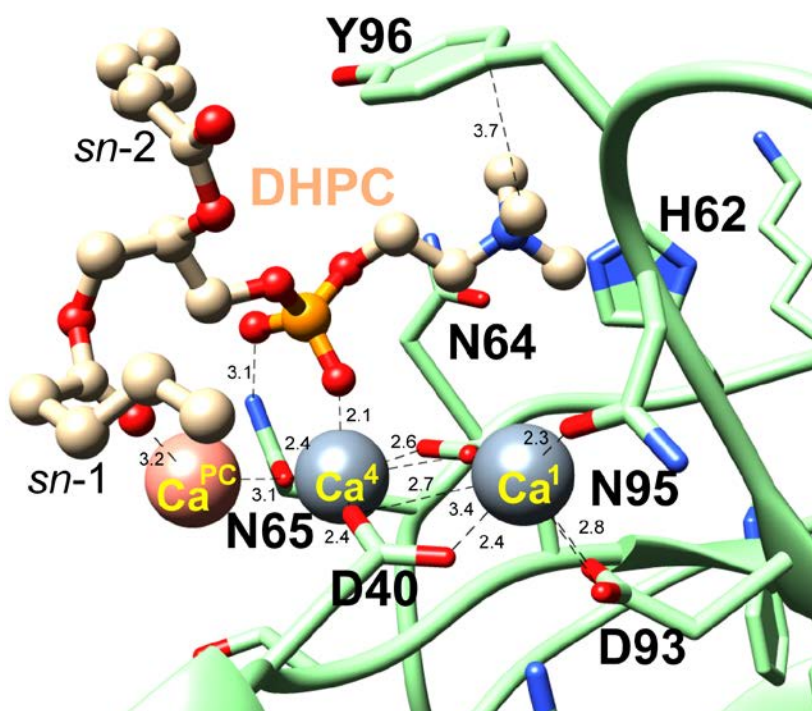

Supplement: supp [file elife-44760-supp-v1.zip › elife_poa_e44760_Figure_2_figure_supplement_1.pdf]
