# Supplementary material for: Structural basis of phosphatidylcholine recognition by the C2–domain of cytosolic phospholipase A2α
Source: eLife journal article supplement (doi:10.7554/elife.44760), 2019-05-03
Supplement: supp [file elife-44760-supp-v1.zip › elife_poa_e44760_Figure_3_source_data_1.pdf]

**Figure 3 - source data 1** Membrane partitioning of cPLA2 $\alpha$  C2-domains and cPLA2 $\alpha$  catalytic activity with point mutated C2-domains in PC binding region.

Figure 3A

| C2 domain conc. ( $\mu$ M) | C2 WT | Y96F  | Y96A  | N65D  |
|----------------------------|-------|-------|-------|-------|
| 0.00                       | 0.00  | 0.00  | 0.00  | 0.00  |
| 0.10                       | 10.72 | 10.43 | 1.89  | 2.63  |
| 0.20                       | 26.35 | 23.37 | 4.12  | 5.81  |
| 0.40                       | 44.29 | 43.70 | 9.18  | 9.90  |
| 0.60                       | 57.12 | 51.53 | 13.41 | 14.22 |
| 1.00                       | 68.78 | 58.39 | 18.31 | 20.94 |
| 2.00                       | 79.89 | 67.15 | 28.58 | 32.01 |
| 4.00                       | 84.69 | 75.06 | 39.52 | 43.39 |

Figure 3B

| [Ca <sup>2+</sup> ] ( $\mu$ M) | C2 WT | Y96F | Y96A  | N65D  |
|--------------------------------|-------|------|-------|-------|
| 0.00                           | 0.00  | 0.00 | 0.00  | 0.00  |
| 0.22                           | 0.01  | 0.02 | -0.01 | -0.01 |
| 0.60                           | 0.07  | 0.03 | 0.03  | 0.03  |
| 1.00                           | 0.15  | 0.07 | 0.03  | 0.05  |
| 2.20                           | 0.52  | 0.13 | 0.05  | 0.11  |
| 6.00                           | 0.87  | 0.54 | 0.16  | 0.28  |
| 10.00                          | 0.93  | 0.66 | 0.24  | 0.32  |
| 22.00                          | 0.96  | 0.70 | 0.31  | 0.48  |
| 60.00                          | 0.97  | 0.81 | 0.36  | 0.67  |
| 100.00                         | 0.98  | 0.78 | 0.43  | 0.69  |
| 220.00                         | 1.00  | 0.84 | 0.47  | 0.74  |

Figure 3C

| lipid Conc. ( $\mu$ M) | C2 WT | Y96F | Y96A | N65D |
|------------------------|-------|------|------|------|
| 0.00                   | 0.00  | 0.00 | 0.00 | 0.00 |
| 0.44                   | 0.21  | 0.21 | 0.05 | 0.06 |
| 0.72                   | 0.40  | 0.38 | 0.09 | 0.10 |
| 1.20                   | 0.44  | 0.38 | 0.21 | 0.21 |
| 2.00                   | 0.66  | 0.64 | 0.30 | 0.29 |
| 4.40                   | 0.95  | 0.84 | 0.51 | 0.64 |
| 7.20                   | 1.12  | 0.96 | 0.70 | 0.81 |
| 12.00                  | 1.14  | 1.10 | 0.83 | 0.92 |
| 20.00                  | 1.22  | 1.11 | 0.97 | 1.00 |

Figure 3D

|      | Affinity | SD   |
|------|----------|------|
| WT   | 1.00     | 0.10 |
| Y96A | 0.27     | 0.04 |
| Y96F | 0.99     | 0.09 |
| N65D | 0.35     | 0.02 |
