# Supplementary material for: Structural basis of phosphatidylcholine recognition by the C2–domain of cytosolic phospholipase A2α
Source: eLife journal article supplement (doi:10.7554/elife.44760), 2019-05-03
Supplement: supp [file elife-44760-supp-v1.zip › elife_poa_e44760_Figure_4_figure_supplement_2.pdf]

**Figure 4, supplement 2**

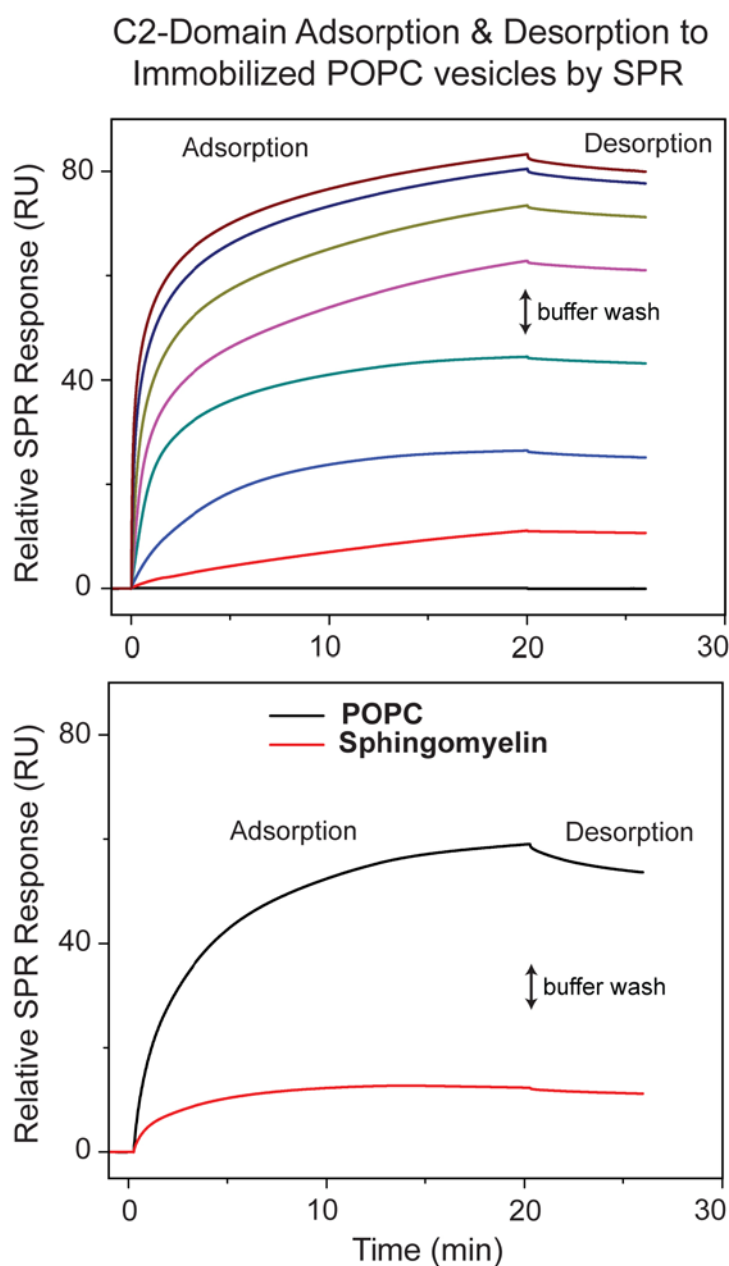

**Figure 4-S2. (Upper panel)** SPR data showing cPLA<sub>2</sub> C2-domain adsorption/desorption to/from immobilized POPC vesicles at varying protein concentrations (0.1, 0.2, 0.4, 0.6, 1, 2, and 4  $\mu$ M; bottom to top) and 5  $\mu$ l/min flow rate. The two-headed arrow indicates switch to buffer containing no protein. The same approach was used to assess C2-domain adsorption to immobilized 18:1-SM vesicles shown in Fig. 4C & 4D. The  $K_d$  values calculated from the binding isotherms for C2-domain and the point mutants are reported in Table 1. **(Lower panel)** SPR data showing the time-dependence for cPLA<sub>2</sub> C2-domain adsorption/desorption to/from immobilized 18:1 SM vesicles at 0.6  $\mu$ M protein concentration.
