# Supplementary material for: Structural basis of phosphatidylcholine recognition by the C2–domain of cytosolic phospholipase A2α
Source: eLife journal article supplement (doi:10.7554/elife.44760), 2019-05-03

**Figure 6, supplement 1**

**Figure 6-S1.**  $\text{Ca}^{2+}$  binding site differences in synaptotagmin-1 C2A domain versus cPLA2 C2-domain complexed with DHPC.

cPLA2 C2-domain (green) is shown with bound  $\text{Ca}^{2+}$  (green) and bound DHPC (yellow). Both  $\text{Ca}_4$  and  $\text{Ca}^{\text{PC}}$  are directly involved in DHPC binding.

Synaptotagmin-1 C2A domain (beige) also binds three  $\text{Ca}^{2+}$  atoms (plum) (PBD:1BYN). Only one  $\text{Ca}^{2+}$  binding site ( $\text{Ca}_1$ ) overlaps with cPLA2 C2-domain. In contrast, all three  $\text{Ca}^{2+}$  binding positions in synaptotagmin-1 C2B domain (Fig. 6C) overlap with those in synaptotagmin-1 C2A.  $\text{Ca}^{2+}$  binding site identification corresponds with the numbering system of Sudhoff & Rizo (1998).

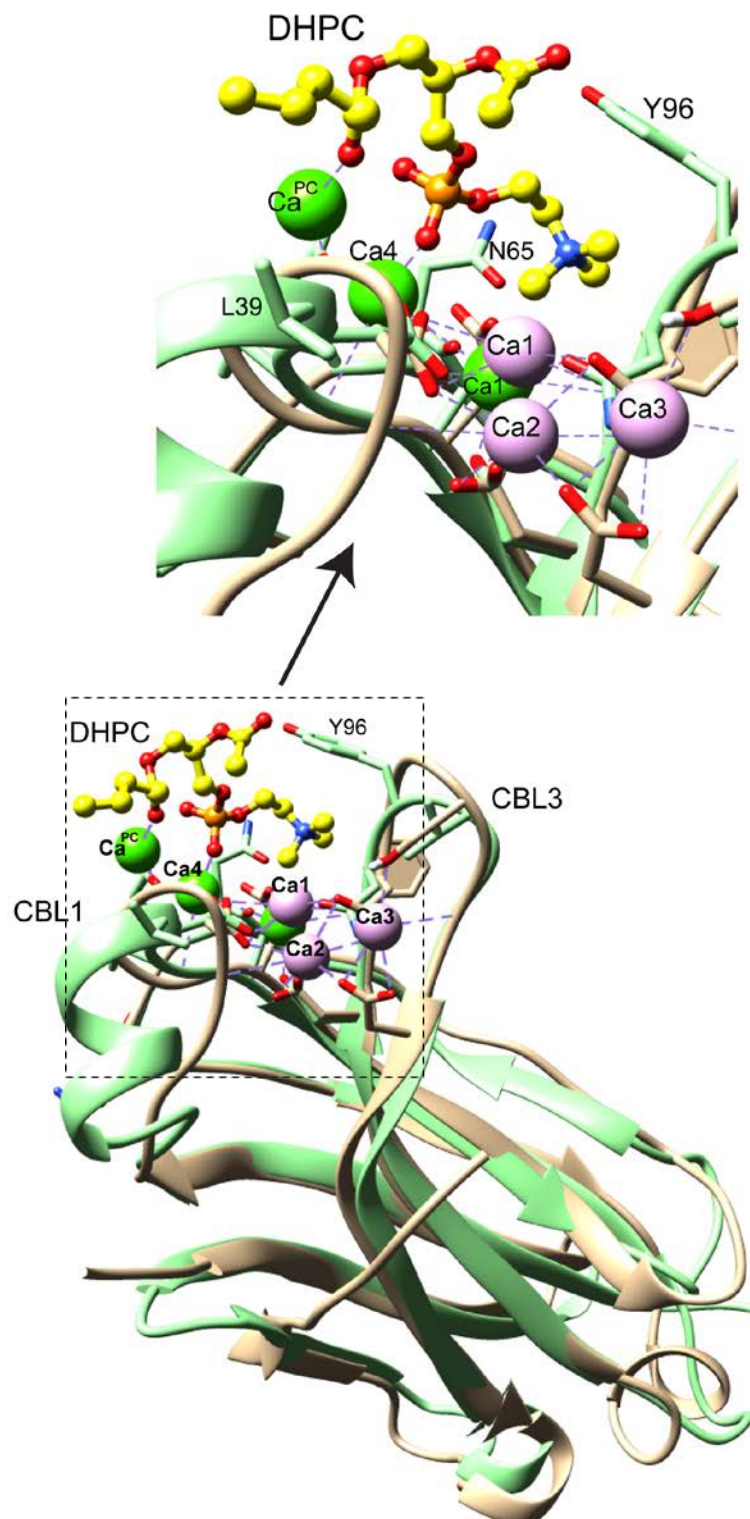

Supplement: supp [file elife-44760-supp-v1.zip › elife_poa_e44760_Figure_6_figure_supplement_1.pdf]
